# Supplementary material for: From plants to nematodes: Serratia grimesii BXF1 genome reveals an adaptation to the modulation of multi-species interactions
Source: PubMed Central journal article supplement (PMC6113876; doi:10.1099/mgen.0.000178), 2018-05-21
Supplement: mgen-4-178-s001.pdf [file mgen-4-178-s001.pdf]

## Supplementary information

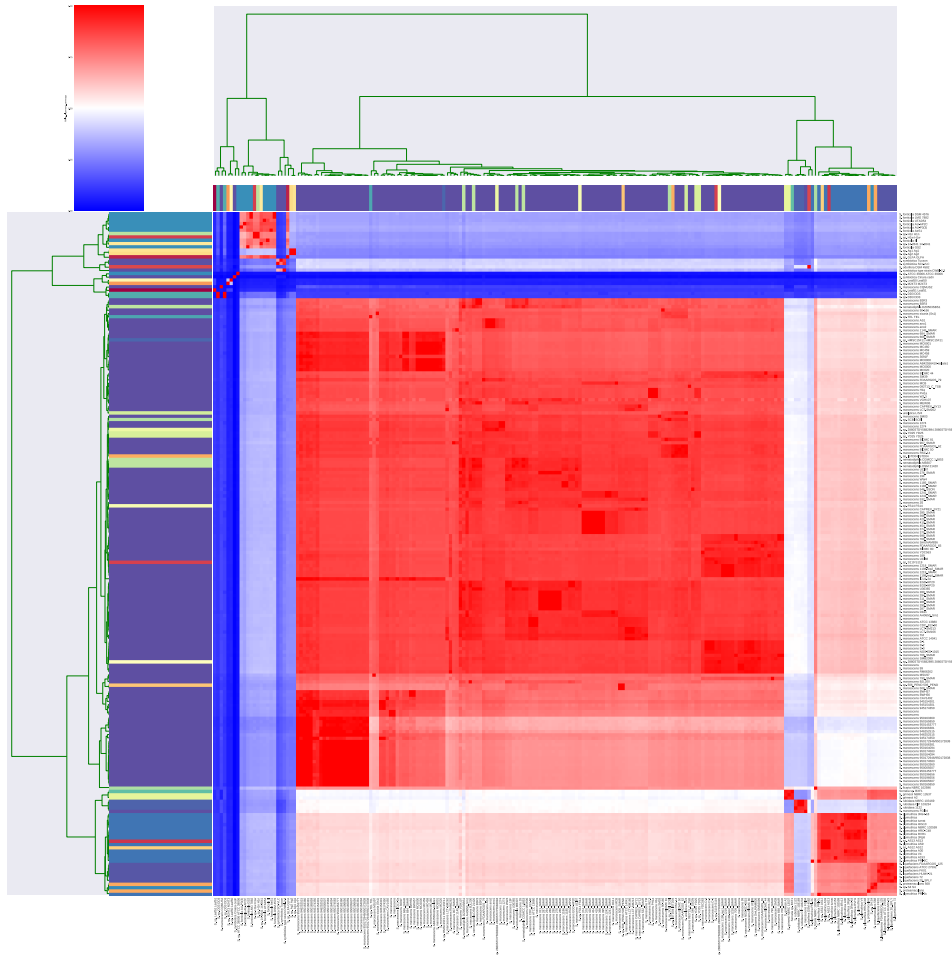

**Figure S1-** Results obtained from pyani analysis in the comparison of Genome alignment coverage average from over 200 *Serratia* species genomes available in the NCBI database. For purposes of easier identification, strain BXF1 is the only one where the labels list it as *Serratia*, while others are annotated as *S*. Red colouring indicates a higher alignment coverage and percentage identity between genomes. Blue colouring indicates a lower alignment coverage and percentage identity between genomes.

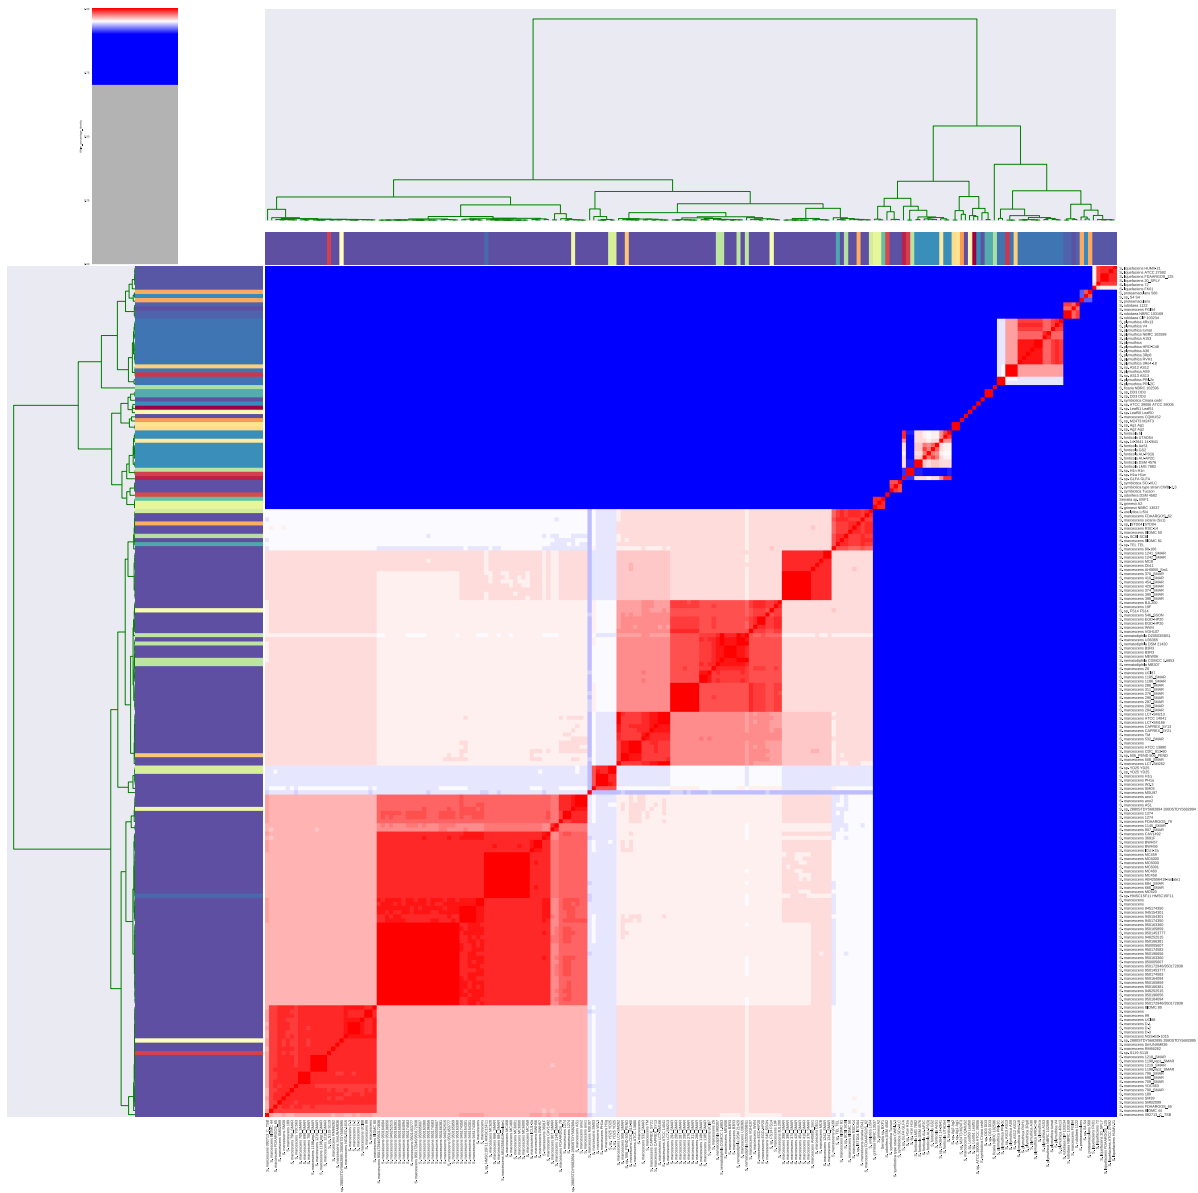

**Figure S2-** Results obtained from pyani analysis in the comparison of average nucleotide identity (ANI) values from over 200 *Serratia* species genomes available in the NCBI database. For purposes of easier identification, strain BXF1 is the only one where the labels list it as *Serratia*, while others are annotated as *S.* Red colouring indicates a higher alignment coverage and percentage identity between genomes. Blue colouring indicates a lower alignment coverage and percentage identity between genomes.

**Table S1-** Genomic islands predicted by Island Viewer and phage sequences predicted by Phast.

| Locus        | Gene start | Gene end | Strand | Product                                                  | External Annotations |     |   |     |
|--------------|------------|----------|--------|----------------------------------------------------------|----------------------|-----|---|-----|
| SGBXF1_00106 | 118994     | 120193   | 1      | putative transporter YycB                                | Phage                | GI1 |   |     |
| SGBXF1_00107 | 120270     | 121616   | 1      | hypothetical protein                                     |                      |     |   |     |
| SGBXF1_00109 | 121987     | 123171   | 1      | Putative prophage CPS-53 integrase                       |                      |     |   |     |
| SGBXF1_00110 | 123168     | 123998   | 1      | hypothetical protein                                     |                      |     |   |     |
| SGBXF1_00111 | 124119     | 124415   | 1      | Prophage CP4-57 regulatory protein (AlpA)                |                      |     |   |     |
| SGBXF1_00112 | 124762     | 124938   | 1      | hypothetical protein                                     |                      |     |   |     |
| SGBXF1_00113 | 124931     | 125284   | 1      | hypothetical protein                                     |                      |     |   |     |
| SGBXF1_00114 | 125329     | 125610   | 1      | hypothetical protein                                     |                      |     |   |     |
| SGBXF1_00115 | 125607     | 125957   | 1      | hypothetical protein                                     |                      |     |   |     |
| SGBXF1_00116 | 125967     | 128648   | 1      | DNA primase TraC                                         |                      |     |   |     |
| SGBXF1_00117 | 129069     | 129818   | 1      | hypothetical protein                                     |                      |     |   |     |
| SGBXF1_00118 | 129821     | 130057   | 1      | DNA-binding transcriptional regulator                    |                      |     |   |     |
| SGBXF1_00119 | 130359     | 131639   | 1      | Reverse transcriptase (RNA-dependent DNA polymerase)     |                      |     |   |     |
| SGBXF1_00120 | 131630     | 133651   | 1      | Reverse transcriptase (RNA-dependent DNA polymerase)     |                      |     |   |     |
| SGBXF1_00121 | 134184     | 135638   | -1     | putative HTH-type transcriptional regulator YdcR         |                      |     |   |     |
| SGBXF1_00122 | 135911     | 136483   | 1      | hypothetical protein                                     |                      |     |   |     |
| SGBXF1_00123 | 136644     | 136967   | 1      | Inner membrane protein YiaW                              |                      |     |   |     |
| SGBXF1_00124 | 136973     | 138109   | 1      | Inner membrane protein YibH                              |                      |     |   |     |
| SGBXF1_00125 | 138674     | 139405   | 1      | Transcriptional activator protein EsaR                   |                      |     |   |     |
| SGBXF1_00332 | 366000     | 366248   | 1      | hypothetical protein                                     |                      |     |   |     |
| SGBXF1_00333 | 366911     | 368521   | 1      | Flavin-dependent tryptophan halogenase PmA               | Pyrrolnitrin         | GI2 |   |     |
| SGBXF1_00334 | 368521     | 369603   | 1      | Monodechloroaminopyrrolnitrin synthase PmB               |                      |     |   |     |
| SGBXF1_00335 | 369648     | 371351   | 1      | Monomeric sarcosine oxidase                              |                      |     |   |     |
| SGBXF1_00336 | 371373     | 372467   | 1      | Aminopyrrolnitrin oxygenase PmD                          |                      |     |   |     |
| SGBXF1_00337 | 372467     | 372637   | 1      | FMN reductase (NADH) RutF                                |                      |     |   |     |
| SGBXF1_00338 | 372634     | 373878   | 1      | High-affinity Na(+)/H(+) antiporter NhaS3                |                      |     |   |     |
| SGBXF1_00410 | 444559     | 445029   | -1     | Arginine repressor                                       | -                    | GI3 |   |     |
| SGBXF1_00411 | 445495     | 446433   | 1      | Malate dehydrogenase                                     |                      |     |   |     |
| SGBXF1_00412 | 446502     | 446762   | -1     | DNA-binding transcriptional regulator Nlp                |                      |     |   |     |
| SGBXF1_00413 | 446944     | 447294   | 1      | Mu DNA-binding domain protein                            |                      |     |   |     |
| SGBXF1_00414 | 447343     | 448314   | -1     | Octaprenyl-diphosphate synthase                          |                      |     |   |     |
| SGBXF1_00415 | 448584     | 448895   | 1      | 50S ribosomal protein L21                                |                      |     |   |     |
| SGBXF1_00508 | 547614     | 548066   | -1     | DNA polymerase III subunit chi                           | -                    | GI4 |   |     |
| SGBXF1_00509 | 548262     | 549773   | -1     | Cytosol aminopeptidase                                   |                      |     |   |     |
| SGBXF1_00510 | 550054     | 551148   | 1      | Lipopolysaccharide export system permease protein LptF   |                      |     |   |     |
| SGBXF1_00511 | 551148     | 552218   | 1      | Lipopolysaccharide export system permease protein LptG   |                      |     |   |     |
| SGBXF1_00513 | 552789     | 554051   | 1      | Prophage CP4-57 integrase                                |                      |     |   |     |
| SGBXF1_00514 | 554150     | 556588   | 1      | hypothetical protein                                     |                      |     |   |     |
| SGBXF1_00515 | 557324     | 557593   | 1      | hypothetical protein                                     |                      |     |   |     |
| SGBXF1_00516 | 557705     | 558037   | -1     | hypothetical protein                                     |                      |     |   |     |
| SGBXF1_00517 | 558058     | 558291   | -1     | hypothetical protein                                     |                      |     |   |     |
| SGBXF1_00518 | 558767     | 559672   | 1      | hypothetical protein                                     |                      |     |   |     |
| SGBXF1_00519 | 560008     | 560643   | 1      | Carbonic anhydrase 1                                     |                      |     |   |     |
| SGBXF1_00514 | 554150     | 556588   | 1      | hypothetical protein                                     |                      |     |   |     |
| SGBXF1_00515 | 557324     | 557593   | 1      | hypothetical protein                                     |                      |     |   |     |
| SGBXF1_00516 | 557705     | 558037   | -1     | hypothetical protein                                     |                      |     |   |     |
| SGBXF1_00517 | 558058     | 558291   | -1     | hypothetical protein                                     |                      |     |   |     |
| SGBXF1_00518 | 558767     | 559672   | 1      | hypothetical protein                                     |                      |     |   |     |
| SGBXF1_01012 | 1096443    | 1096757  | 1      | transcriptional regulator BoIA                           |                      |     | - | GI5 |
| SGBXF1_01013 | 1097124    | 1098428  | 1      | Trigger factor                                           |                      |     |   |     |
| SGBXF1_01014 | 1098992    | 1099615  | 1      | ATP-dependent Clp protease proteolytic subunit precursor |                      |     |   |     |
| SGBXF1_01015 | 1099779    | 1101050  | 1      | ATP-dependent Clp protease ATP-binding subunit ClpX      |                      |     |   |     |
| SGBXF1_01016 | 1101245    | 1103599  | 1      | Lon protease                                             |                      |     |   |     |
| SGBXF1_01017 | 1103816    | 1104088  | 1      | DNA-binding protein HU-beta                              |                      |     |   |     |
| SGBXF1_01018 | 1104271    | 1106157  | 1      | Peptidyl-prolyl cis-trans isomerase D                    |                      |     |   |     |
| SGBXF1_01019 | 1106297    | 1106683  | 1      | ComE operon protein 1                                    |                      |     |   |     |
| SGBXF1_01020 | 1106840    | 1107256  | 1      | Long-chain acyl-CoA thioesterase FadM                    |                      |     |   |     |
| SGBXF1_01021 | 1107371    | 1108069  | -1     | 7-cyano-7-deazaguanine synthase                          |                      |     |   |     |

|              |         |         |    |                                                                    |           |     |       |     |
|--------------|---------|---------|----|--------------------------------------------------------------------|-----------|-----|-------|-----|
| SGBXF1_01549 | 1653087 | 1654127 | 1  | Polysaccharide biosynthesis/export protein                         | O-antigen | GI6 |       |     |
| SGBXF1_01550 | 1654132 | 1654566 | 1  | Low molecular weight protein-tyrosine-phosphatase wzb              |           |     |       |     |
| SGBXF1_01551 | 1654579 | 1656750 | 1  | Tyrosine-protein kinase wzc                                        |           |     |       |     |
| SGBXF1_01552 | 1656914 | 1658035 | 1  | Glycosyl transferases group 1                                      |           |     |       |     |
| SGBXF1_01553 | 1658113 | 1659531 | 1  | hypothetical protein                                               |           |     |       |     |
| SGBXF1_01554 | 1659528 | 1660586 | 1  | D-inositol 3-phosphate glycosyltransferase                         |           |     |       |     |
| SGBXF1_01555 | 1660644 | 1661375 | 1  | hypothetical protein                                               |           |     |       |     |
| SGBXF1_01556 | 1661952 | 1663385 | 1  | UDP-glucose:undecaprenyl-phosphate glucose-1-phosphate transferase |           |     |       |     |
| SGBXF1_01557 | 1663567 | 1665174 | 1  | hypothetical protein                                               |           |     |       |     |
| SGBXF1_01562 | 1674316 | 1675551 | 1  | Putative O-antigen transporter                                     |           |     |       |     |
| SGBXF1_01563 | 1675551 | 1676648 | 1  | UDP-galactopyranose mutase                                         |           |     |       |     |
| SGBXF1_01564 | 1676657 | 1677640 | 1  | hypothetical protein                                               |           |     |       |     |
| SGBXF1_01565 | 1677826 | 1679250 | 1  | Mannose-1-phosphate guanylyltransferase 1                          |           |     |       |     |
| SGBXF1_01567 | 1680798 | 1681811 | 1  | UDP-glucose 4-epimerase                                            |           |     |       |     |
| SGBXF1_01568 | 1681954 | 1683018 | 1  | dTDP-glucose 4,6-dehydratase 2                                     |           |     |       |     |
| SGBXF1_01569 | 1683039 | 1683908 | 1  | Glucose-1-phosphate thymidyltransferase 2                          |           |     |       |     |
| SGBXF1_01570 | 1683910 | 1684443 | 1  | dTDP-4-dehydrorhamnose 3,5-epimerase                               |           |     |       |     |
| SGBXF1_01571 | 1684443 | 1685306 | 1  | dTDP-4-dehydrorhamnose reductase                                   |           |     |       |     |
| SGBXF1_01572 | 1685435 | 1686298 | 1  | hypothetical protein                                               |           |     |       |     |
| SGBXF1_01573 | 1686861 | 1687394 | 1  | dTDP-4-dehydrorhamnose 3,5-epimerase                               |           |     |       |     |
| SGBXF1_01574 | 1687502 | 1688377 | 1  | dTDP-4-dehydrorhamnose reductase                                   |           |     |       |     |
| SGBXF1_01575 | 1688399 | 1689187 | 1  | Teichoic acid translocation permease protein TagG                  |           |     |       |     |
| SGBXF1_01576 | 1689177 | 1690568 | 1  | Teichoic acids export ATP-binding protein TagH                     |           |     |       |     |
| SGBXF1_01577 | 1690561 | 1694577 | 1  | ?-D-glucose-1-phosphatase                                          |           |     |       |     |
| SGBXF1_01578 | 1694640 | 1695566 | 1  | putative glycosyl transferase                                      |           |     |       |     |
| SGBXF1_01579 | 1695581 | 1696399 | 1  | N-acetylglucosaminyl-diphospho-decaprenol L-rhamnosyltransferase   |           |     |       |     |
| SGBXF1_01580 | 1696469 | 1696612 | 1  | hypothetical protein                                               |           |     |       |     |
| SGBXF1_01758 | 1892516 | 1893679 | -1 | Tyrosine recombinase XerD                                          |           |     | Phage | GI7 |
| SGBXF1_01759 | 1894061 | 1894729 | -1 | hypothetical protein                                               |           |     |       |     |
| SGBXF1_01760 | 1894726 | 1894908 | -1 | hypothetical protein                                               |           |     |       |     |
| SGBXF1_01761 | 1894924 | 1895313 | -1 | hypothetical protein                                               |           |     |       |     |
| SGBXF1_01762 | 1895772 | 1896029 | -1 | hypothetical protein                                               |           |     |       |     |
| SGBXF1_01763 | 1896088 | 1896453 | -1 | hypothetical protein                                               |           |     |       |     |
| SGBXF1_01764 | 1896450 | 1896629 | -1 | hypothetical protein                                               |           |     |       |     |
| SGBXF1_01765 | 1896632 | 1897036 | -1 | hypothetical protein                                               |           |     |       |     |
| SGBXF1_01766 | 1897036 | 1897245 | -1 | hypothetical protein                                               |           |     |       |     |
| SGBXF1_01767 | 1897242 | 1897670 | -1 | HNH endonuclease                                                   |           |     |       |     |
| SGBXF1_01768 | 1897663 | 1898178 | -1 | hypothetical protein                                               |           |     |       |     |
| SGBXF1_01769 | 1898165 | 1898788 | -1 | hypothetical protein                                               |           |     |       |     |
| SGBXF1_01770 | 1898785 | 1899279 | -1 | hypothetical protein                                               |           |     |       |     |
| SGBXF1_01760 | 1894726 | 1894908 | -1 | hypothetical protein                                               |           |     |       |     |
| SGBXF1_01761 | 1894924 | 1895313 | -1 | hypothetical protein                                               |           |     |       |     |
| SGBXF1_01762 | 1895772 | 1896029 | -1 | hypothetical protein                                               |           |     |       |     |
| SGBXF1_01763 | 1896088 | 1896453 | -1 | hypothetical protein                                               |           |     |       |     |
| SGBXF1_01764 | 1896450 | 1896629 | -1 | hypothetical protein                                               |           |     |       |     |
| SGBXF1_01765 | 1896632 | 1897036 | -1 | hypothetical protein                                               |           |     |       |     |
| SGBXF1_01766 | 1897036 | 1897245 | -1 | hypothetical protein                                               |           |     |       |     |
| SGBXF1_01767 | 1897242 | 1897670 | -1 | HNH endonuclease                                                   |           |     |       |     |
| SGBXF1_01768 | 1897663 | 1898178 | -1 | hypothetical protein                                               |           |     |       |     |
| SGBXF1_01769 | 1898165 | 1898788 | -1 | hypothetical protein                                               |           |     |       |     |
| SGBXF1_01770 | 1898785 | 1899279 | -1 | hypothetical protein                                               |           |     |       |     |
| SGBXF1_01771 | 1899282 | 1899425 | -1 | hypothetical protein                                               |           |     |       |     |
| SGBXF1_01772 | 1899419 | 1899637 | -1 | hypothetical protein                                               |           |     |       |     |
| SGBXF1_01773 | 1899918 | 1900016 | -1 | hypothetical protein                                               |           |     |       |     |
| SGBXF1_01774 | 1900019 | 1900195 | -1 | hypothetical protein                                               |           |     |       |     |
| SGBXF1_01775 | 1900232 | 1900570 | -1 | hypothetical protein                                               |           |     |       |     |
| SGBXF1_01776 | 1901061 | 1901204 | 1  | hypothetical protein                                               |           |     |       |     |
| SGBXF1_01777 | 1901245 | 1901643 | -1 | hypothetical protein                                               |           |     |       |     |
| SGBXF1_01778 | 1901640 | 1902305 | -1 | hypothetical protein                                               |           |     |       |     |
| SGBXF1_01779 | 1902716 | 1903360 | -1 | putative HTH-type transcriptional regulator                        |           |     |       |     |

|              |         |         |    |                                                              |   |     |
|--------------|---------|---------|----|--------------------------------------------------------------|---|-----|
| SGBXF1_01780 | 1903452 | 1903679 | 1  | hypothetical protein                                         |   |     |
| SGBXF1_01781 | 1903695 | 1904021 | 1  | Bacteriophage CII protein                                    |   |     |
| SGBXF1_01782 | 1904305 | 1905069 | 1  | Phage antirepressor protein KilAC domain protein             |   |     |
| SGBXF1_01783 | 1905072 | 1905248 | 1  | hypothetical protein                                         |   |     |
| SGBXF1_01784 | 1905245 | 1906267 | 1  | hypothetical protein                                         |   |     |
| SGBXF1_01785 | 1906264 | 1907235 | 1  | hypothetical protein                                         |   |     |
| SGBXF1_01786 | 1907586 | 1907984 | 1  | Phage antitermination protein Q                              |   |     |
| SGBXF1_01787 | 1908238 | 1908420 | 1  | hypothetical protein                                         |   |     |
| SGBXF1_01788 | 1908464 | 1909096 | 1  | hypothetical protein                                         |   |     |
| SGBXF1_01789 | 1909361 | 1909708 | 1  | hypothetical protein                                         |   |     |
| SGBXF1_01790 | 1909979 | 1910332 | 1  | hypothetical protein                                         |   |     |
| SGBXF1_01791 | 1910424 | 1910660 | 1  | Lysis protein S                                              |   |     |
| SGBXF1_01792 | 1910663 | 1911148 | 1  | Lysozyme RrrD                                                |   |     |
| SGBXF1_01793 | 1911145 | 1911519 | 1  | hypothetical protein                                         |   |     |
| SGBXF1_01794 | 1912112 | 1912366 | 1  | DNA polymerase III subunit theta                             |   |     |
| SGBXF1_01795 | 1912330 | 1912446 | -1 | hypothetical protein                                         |   |     |
| SGBXF1_01796 | 1912519 | 1912638 | 1  | hypothetical protein                                         |   |     |
| SGBXF1_01797 | 1912719 | 1913129 | 1  | hypothetical protein                                         |   |     |
| SGBXF1_01798 | 1913229 | 1913906 | 1  | hypothetical protein                                         |   |     |
| SGBXF1_01799 | 1913844 | 1914146 | -1 | hypothetical protein                                         |   |     |
| SGBXF1_01800 | 1914291 | 1914506 | -1 | hypothetical protein                                         |   |     |
| SGBXF1_01801 | 1914533 | 1915063 | 1  | Terminase small subunit                                      |   |     |
| SGBXF1_01802 | 1915060 | 1916319 | 1  | Phage terminase large subunit                                |   |     |
| SGBXF1_01803 | 1916375 | 1916569 | 1  | hypothetical protein                                         |   |     |
| SGBXF1_01804 | 1916625 | 1917953 | 1  | hypothetical protein                                         |   |     |
| SGBXF1_01805 | 1917937 | 1918863 | 1  | Phage Mu protein F like protein                              |   |     |
| SGBXF1_01806 | 1918867 | 1920132 | 1  | hypothetical protein                                         |   |     |
| SGBXF1_01816 | 1925504 | 1925713 | 1  | hypothetical protein                                         |   |     |
| SGBXF1_01817 | 1925717 | 1926547 | 1  | hypothetical protein                                         |   |     |
| SGBXF1_01818 | 1926695 | 1926844 | 1  | hypothetical protein                                         |   |     |
| SGBXF1_01819 | 1926916 | 1927821 | -1 | hypothetical protein                                         |   |     |
| SGBXF1_01820 | 1927982 | 1928266 | 1  | Arc-like DNA binding domain protein                          | - | G18 |
| SGBXF1_01821 | 1928376 | 1928657 | 1  | hypothetical protein                                         |   |     |
| SGBXF1_01822 | 1928726 | 1931908 | 1  | hypothetical protein                                         |   |     |
| SGBXF1_01823 | 1931911 | 1932534 | 1  | hypothetical protein                                         |   |     |
| SGBXF1_02051 | 2151504 | 2152403 | 1  | hypothetical protein                                         |   |     |
| SGBXF1_02052 | 2152657 | 2154159 | 1  | hypothetical protein                                         |   |     |
| SGBXF1_02053 | 2154528 | 2154959 | 1  | hypothetical protein                                         |   |     |
| SGBXF1_02054 | 2155014 | 2155643 | 1  | hypothetical protein                                         |   |     |
| SGBXF1_02055 | 2155809 | 2156933 | -1 | hypothetical protein                                         |   |     |
| SGBXF1_02056 | 2156914 | 2157159 | -1 | Excisionase-like protein                                     |   |     |
| SGBXF1_02057 | 2157159 | 2157656 | -1 | hypothetical protein                                         |   |     |
| SGBXF1_02058 | 2158036 | 2158524 | 1  | hypothetical protein                                         |   |     |
| SGBXF1_02059 | 2158970 | 2159260 | -1 | hypothetical protein                                         |   |     |
| SGBXF1_02060 | 2159543 | 2159827 | 1  | Acetyltransferase (GNAT) family protein                      |   |     |
| SGBXF1_02639 | 2787422 | 2788144 | 1  | ChaC-like protein                                            |   |     |
| SGBXF1_02640 | 2788248 | 2788712 | 1  | SnoaL-like polyketide cyclase                                |   |     |
| SGBXF1_02641 | 2788921 | 2789502 | 1  | Bifunctional transcriptional activator/DNA repair enzyme Ada |   |     |
| SGBXF1_02642 | 2789499 | 2790218 | 1  | hypothetical protein                                         |   |     |
| SGBXF1_02643 | 2790221 | 2790871 | 1  | Alpha-ketoglutarate-dependent dioxygenase AlkB               |   |     |
| SGBXF1_02644 | 2790947 | 2791141 | 1  | hypothetical protein                                         |   |     |
| SGBXF1_02645 | 2791187 | 2791837 | 1  | DNA-3-methyladenine glycosylase                              |   |     |
| SGBXF1_02646 | 2791916 | 2792986 | 1  | Bifunctional transcriptional activator/DNA repair enzyme Ada |   |     |
| SGBXF1_02647 | 2793001 | 2793693 | 1  | hypothetical protein                                         |   |     |
| SGBXF1_02648 | 2793710 | 2794015 | 1  | hypothetical protein                                         |   |     |
| SGBXF1_02649 | 2794012 | 2794773 | 1  | hypothetical protein                                         |   |     |
| SGBXF1_02650 | 2794989 | 2795411 | 1  | LexA repressor                                               |   |     |
| SGBXF1_03207 | 3364807 | 3365022 | 1  | hypothetical protein                                         |   |     |
| SGBXF1_03208 | 3365307 | 3366809 | -1 | Chaperone protein DnaJ                                       |   |     |
| SGBXF1_03209 | 3367295 | 3367891 | -1 | hypothetical protein                                         |   |     |
| SGBXF1_03210 | 3367977 | 3368654 | 1  | HTH domain protein                                           |   |     |
| SGBXF1_03211 | 3368714 | 3369160 | -1 | universal stress protein UspC                                |   |     |
| SGBXF1_03229 | 3389783 | 3390325 | 1  | hypothetical protein                                         |   |     |
| SGBXF1_03230 | 3390383 | 3391300 | -1 | HTH-type transcriptional regulator DmlR                      |   |     |
| SGBXF1_03231 | 3391405 | 3392613 | 1  | 4-hydroxybenzoate transporter PcaK                           |   |     |
| SGBXF1_03232 | 3392797 | 3394392 | -1 | RNA polymerase sigma factor RpoD                             |   |     |
| SGBXF1_03233 | 3394994 | 3395920 | 1  | hypothetical protein                                         |   |     |
| SGBXF1_03234 | 3396082 | 3396825 | -1 | Fatty acyl-CoA reductase                                     |   |     |

|              |         |         |    |                                                            |  |  |
|--------------|---------|---------|----|------------------------------------------------------------|--|--|
| SGBXF1_03235 | 3397021 | 3397482 | -1 | hypothetical protein                                       |  |  |
| SGBXF1_03236 | 3397878 | 3398270 | -1 | LexA repressor                                             |  |  |
| SGBXF1_03237 | 3398403 | 3398819 | -1 | hypothetical protein                                       |  |  |
| SGBXF1_03238 | 3398865 | 3400619 | -1 | Lipid A export ATP-binding/permease protein MsbA           |  |  |
| SGBXF1_03753 | 3970473 | 3970811 | 1  | Outer membrane protein assembly factor BamE precursor      |  |  |
| SGBXF1_03754 | 3970926 | 3971210 | -1 | Persistence and stress-resistance antitoxin PasI           |  |  |
| SGBXF1_03755 | 3971191 | 3971637 | -1 | Ribosome association toxin RtaA                            |  |  |
| SGBXF1_03756 | 3971799 | 3972281 | 1  | SsrA-binding protein                                       |  |  |
| SGBXF1_03758 | 3972777 | 3973016 | -1 | hypothetical protein                                       |  |  |
| SGBXF1_03759 | 3973723 | 3975378 | -1 | hypothetical protein                                       |  |  |
| SGBXF1_03760 | 3975375 | 3975935 | -1 | hypothetical protein                                       |  |  |
| SGBXF1_03761 | 3975910 | 3976632 | -1 | hypothetical protein                                       |  |  |
| SGBXF1_03762 | 3976622 | 3977170 | -1 | Caudovirales tail fiber assembly protein                   |  |  |
| SGBXF1_03763 | 3977174 | 3980290 | -1 | Tail fiber protein                                         |  |  |
| SGBXF1_03764 | 3980296 | 3980901 | -1 | hypothetical protein                                       |  |  |
| SGBXF1_03765 | 3980894 | 3982078 | -1 | Baseplate J-like protein                                   |  |  |
| SGBXF1_03766 | 3982056 | 3982403 | -1 | hypothetical protein                                       |  |  |
| SGBXF1_03767 | 3982403 | 3984934 | -1 | Phage-related minor tail protein                           |  |  |
| SGBXF1_03768 | 3985122 | 3985391 | -1 | hypothetical protein                                       |  |  |
| SGBXF1_03769 | 3985539 | 3985883 | -1 | hypothetical protein                                       |  |  |
| SGBXF1_03770 | 3985883 | 3986224 | -1 | hypothetical protein                                       |  |  |
| SGBXF1_03771 | 3986211 | 3986513 | -1 | Phage holin family 2                                       |  |  |
| SGBXF1_03772 | 3986523 | 3986978 | -1 | hypothetical protein                                       |  |  |
| SGBXF1_03773 | 3986975 | 3988099 | -1 | hypothetical protein                                       |  |  |
| SGBXF1_03774 | 3988096 | 3988806 | -1 | Phage virion morphogenesis family protein                  |  |  |
| SGBXF1_03775 | 3988803 | 3989306 | -1 | P2 phage tail completion protein R (GpR)                   |  |  |
| SGBXF1_03776 | 3989303 | 3989755 | -1 | Phage head completion protein (GPL)                        |  |  |
| SGBXF1_03777 | 3989855 | 3990559 | -1 | Phage small terminase subunit                              |  |  |
| SGBXF1_03778 | 3990566 | 3991582 | -1 | Phage major capsid protein, P2 family                      |  |  |
| SGBXF1_03779 | 3991631 | 3992470 | -1 | Phage capsid scaffolding protein (GPO) serine peptidase    |  |  |
| SGBXF1_03780 | 3992780 | 3994417 | 1  | Terminase-like family protein                              |  |  |
| SGBXF1_03781 | 3994414 | 3995463 | 1  | Phage portal protein                                       |  |  |
| SGBXF1_03782 | 3995514 | 3995786 | 1  | Ogr/Delta-like zinc finger                                 |  |  |
| SGBXF1_03783 | 3995757 | 3995975 | -1 | hypothetical protein                                       |  |  |
| SGBXF1_03784 | 3996066 | 3998075 | -1 | Bacteriophage replication gene A protein (GPA)             |  |  |
| SGBXF1_03785 | 3998069 | 3998338 | -1 | hypothetical protein                                       |  |  |
| SGBXF1_03786 | 3998347 | 3998454 | -1 | hypothetical protein                                       |  |  |
| SGBXF1_03787 | 3998436 | 3998675 | -1 | hypothetical protein                                       |  |  |
| SGBXF1_03788 | 3998753 | 3999160 | -1 | hypothetical protein                                       |  |  |
| SGBXF1_03789 | 3999163 | 3999582 | -1 | hypothetical protein                                       |  |  |
| SGBXF1_03790 | 3999585 | 3999788 | -1 | hypothetical protein                                       |  |  |
| SGBXF1_03791 | 3999798 | 4000307 | -1 | Phage regulatory protein CII (CP76)                        |  |  |
| SGBXF1_03792 | 4000340 | 4000600 | -1 | hypothetical protein                                       |  |  |
| SGBXF1_03793 | 4000757 | 4001320 | 1  | Bacteriophage CI repressor helix-turn-helix domain protein |  |  |
| SGBXF1_03794 | 4001324 | 4002391 | 1  | Tyrosine recombinase XerD                                  |  |  |
| SGBXF1_03795 | 4002463 | 4002678 | -1 | hypothetical protein                                       |  |  |
| SGBXF1_03796 | 4002843 | 4003565 | 1  | Prophage CP4-57 integrase                                  |  |  |
| SGBXF1_03797 | 4003935 | 4006655 | 1  | hypothetical protein                                       |  |  |
| SGBXF1_03798 | 4006788 | 4006994 | 1  | hypothetical protein                                       |  |  |
| SGBXF1_03799 | 4007347 | 4007694 | -1 | hypothetical protein                                       |  |  |
| SGBXF1_03800 | 4007887 | 4008021 | -1 | hypothetical protein                                       |  |  |
| SGBXF1_03801 | 4008067 | 4008762 | 1  | hypothetical protein                                       |  |  |
| SGBXF1_03802 | 4009221 | 4009871 | 1  | Metal-binding protein ZinT precursor                       |  |  |
| SGBXF1_03792 | 4000340 | 4000600 | -1 | hypothetical protein                                       |  |  |
| SGBXF1_03793 | 4000757 | 4001320 | 1  | Bacteriophage CI repressor helix-turn-helix domain protein |  |  |
| SGBXF1_03794 | 4001324 | 4002391 | 1  | Tyrosine recombinase XerD                                  |  |  |
| SGBXF1_03795 | 4002463 | 4002678 | -1 | hypothetical protein                                       |  |  |
| SGBXF1_03796 | 4002843 | 4003565 | 1  | Prophage CP4-57 integrase                                  |  |  |
| SGBXF1_03797 | 4003935 | 4006655 | 1  | hypothetical protein                                       |  |  |
| SGBXF1_03798 | 4006788 | 4006994 | 1  | hypothetical protein                                       |  |  |
| SGBXF1_03799 | 4007347 | 4007694 | -1 | hypothetical protein                                       |  |  |
| SGBXF1_03800 | 4007887 | 4008021 | -1 | hypothetical protein                                       |  |  |
| SGBXF1_03801 | 4008067 | 4008762 | 1  | hypothetical protein                                       |  |  |

Phage

G12

-

G13

|              |         |         |    |                                           |  |  |
|--------------|---------|---------|----|-------------------------------------------|--|--|
| SGBXF1_03802 | 4009221 | 4009871 | 1  | Metal-binding protein ZinT precursor      |  |  |
| SGBXF1_03986 | 4202935 | 4203747 | -1 | Histidinol-phosphatase                    |  |  |
| SGBXF1_03987 | 4204062 | 4204604 | -1 | NUDIX domain protein                      |  |  |
| SGBXF1_03988 | 4204760 | 4205983 | -1 | 2'-deamino-2'-hydroxyneamine transaminase |  |  |
| SGBXF1_03989 | 4206002 | 4207042 | -1 | L-asparagine oxygenase                    |  |  |
| SGBXF1_03990 | 4207749 | 4208918 | 1  | Multidrug resistance protein MdtL         |  |  |

**Table S2- CAZymes families predicted**

| Sequence ID                                                                                | CAZy Families |
|--------------------------------------------------------------------------------------------|---------------|
| SGBXF1_04203 Cell division protein FtsP precursor                                          | AA1           |
| SGBXF1_04098 Blue copper oxidase CueO precursor                                            | AA1           |
| SGBXF1_03554 GlcNAc-binding protein A precursor                                            | AA10          |
| SGBXF1_03212 Catalase-peroxidase                                                           | AA2           |
| SGBXF1_01943 NADH dehydrogenase                                                            | AA3           |
| SGBXF1_04535 Nitrite reductase [NAD(P)H]                                                   | AA3           |
| SGBXF1_02157 Gluconate 2-dehydrogenase flavoprotein precursor                              | AA3           |
| SGBXF1_00215 Anaerobic glycerol-3-phosphate dehydrogenase subunit A                        | AA3           |
| SGBXF1_02793 D-amino acid dehydrogenase small subunit                                      | AA3           |
| SGBXF1_02368 Fructose dehydrogenase large subunit                                          | AA3           |
| SGBXF1_02080 Gamma-glutamylputrescine oxidoreductase                                       | AA3           |
| SGBXF1_03432 tRNA 5-methylaminomethyl-2-thiouridine biosynthesis bifunctional protein MnmC | AA3           |
| SGBXF1_03592 NADH dehydrogenase-like protein/MT1860                                        | AA3           |
| SGBXF1_01987 L-2-hydroxyglutarate oxidase LhgO                                             | AA3           |
| SGBXF1_04290 Glutamate synthase [NADPH] small chain                                        | AA3           |
| SGBXF1_04107 Dihydropyridyl dehydrogenase                                                  | AA3           |
| SGBXF1_04680 Soluble pyridine nucleotide transhydrogenase                                  | AA3           |
| SGBXF1_04061 Rhodocoxin reductase                                                          | AA3           |
| SGBXF1_01737 Fructose dehydrogenase large subunit                                          | AA3           |
| SGBXF1_02474 4-methylaminobutanoate oxidase (formaldehyde-forming)                         | AA3           |
| SGBXF1_04153 Oxygen-dependent choline dehydrogenase                                        | AA3           |
| SGBXF1_01906 N-methyl-L-tryptophan oxidase                                                 | AA3           |
| SGBXF1_01848 Hydrogen cyanide synthase subunit HcnB                                        | AA3           |
| SGBXF1_01482 Oxygen-dependent choline dehydrogenase                                        | AA3           |
| SGBXF1_00504 Alcohol dehydrogenase [acceptor]                                              | AA3           |
| SGBXF1_04578 Aerobic glycerol-3-phosphate dehydrogenase                                    | AA3           |
| SGBXF1_00547 Gamma-glutamylputrescine oxidoreductase                                       | AA3           |
| SGBXF1_04683 Dihydropyridyl dehydrogenase                                                  | AA3           |
| SGBXF1_04644 Glutathione reductase                                                         | AA3           |
| SGBXF1_01846 Hydrogen cyanide synthase subunit HcnC precursor                              | AA3           |
| SGBXF1_01656 Thioredoxin reductase                                                         | AA3/CE10      |
| SGBXF1_04258 2,4-dienoyl-CoA reductase [NADPH]                                             | AA3/CE10      |
| SGBXF1_02198 putative FAD-linked oxidoreductase                                            | AA4/AA7       |
| SGBXF1_01719 Outer membrane protein A precursor                                            | AA5           |
| SGBXF1_00611 Peptidoglycan-binding protein ArfA                                            | AA5           |
| SGBXF1_03020 Motility protein B                                                            | AA5           |
| SGBXF1_01213 Peptidoglycan-associated lipoprotein precursor                                | AA5           |
| SGBXF1_00067 putative lipoprotein YiaD precursor                                           | AA5           |
| SGBXF1_03905 Sulfite reductase [NADPH] flavoprotein alpha-component                        | AA6           |
| SGBXF1_00039 FMN-dependent NADPH-azoreductase                                              | AA6           |
| SGBXF1_03180 Putative NAD(P)H-dependent FMN-containing oxidoreductase YwqN                 | AA6           |
| SGBXF1_00493 Enamine/imine deaminase                                                       | AA6           |
| SGBXF1_00014 Sulfite reductase [NADPH] flavoprotein alpha-component                        | AA6           |
| SGBXF1_01961 Enamine/imine deaminase                                                       | AA6           |
| SGBXF1_03997 Flavodoxin                                                                    | AA6           |
| SGBXF1_02256 Putative reactive intermediate deaminase TdcF                                 | AA6           |
| SGBXF1_02812 Putative aminoacrylate peracid reductase RutC                                 | AA6           |
| SGBXF1_00484 Enamine/imine deaminase                                                       | AA6           |
| SGBXF1_01171 Flavodoxin                                                                    | AA6           |
| SGBXF1_03107 Putative reactive intermediate deaminase TdcF                                 | AA6           |
| SGBXF1_01704 FMN reductase (NADPH)                                                         | AA6           |
| SGBXF1_01103 p-benzoquinone reductase                                                      | AA6           |
| SGBXF1_01751 Putative aminoacrylate peracid reductase RutC                                 | AA6           |
| SGBXF1_00742 Sulfite reductase [NADPH] flavoprotein alpha-component                        | AA6/GH130     |
| SGBXF1_00285 UDP-N-acetylenolpyruvoylglucosamine reductase                                 | AA7           |
| SGBXF1_03048 Catechol 1,2-dioxygenase                                                      | CBM12         |
| SGBXF1_02520 Protocatechuate 3,4-dioxygenase alpha chain                                   | CBM12         |
| SGBXF1_02519 Protocatechuate 3,4-dioxygenase beta chain                                    | CBM12         |
| SGBXF1_00631 Chaperone protein DnaK                                                        | CBM13         |
| SGBXF1_04357 Rod shape-determining protein MreB                                            | CBM13         |
| SGBXF1_03616 Chaperone protein DnaK                                                        | CBM13         |
| SGBXF1_03691 Chaperone protein HscA                                                        | CBM13         |
| SGBXF1_01901 Protein YceI                                                                  | CBM2          |



|                                                                                     |                |
|-------------------------------------------------------------------------------------|----------------|
| SGBXF1_01912 Ribonuclease E                                                         | CBM20          |
| SGBXF1_04353 Ribonuclease G                                                         | CBM20          |
| SGBXF1_03660 Spermidine N(1)-acetyltransferase                                      | CBM26          |
| SGBXF1_03617 Acetyltransferase (GNAT) family protein                                | CBM26          |
| SGBXF1_01872 Putative ribosomal N-acetyltransferase YdaF                            | CBM26          |
| SGBXF1_01495 Putative ribosomal N-acetyltransferase YdaF                            | CBM26          |
| SGBXF1_02324 hypothetical protein                                                   | CBM26          |
| SGBXF1_02783 hypothetical protein                                                   | CBM26          |
| SGBXF1_01454 Acetyltransferase (GNAT) family protein                                | CBM26          |
| SGBXF1_00932 Acetyltransferase (GNAT) family protein                                | CBM26          |
| SGBXF1_03470 Putative ribosomal N-acetyltransferase YdaF                            | CBM26          |
| SGBXF1_02844 Putative ribosomal N-acetyltransferase YdaF                            | CBM26          |
| SGBXF1_04161 Non-hemolytic phospholipase C precursor                                | CBM32          |
| SGBXF1_01380 Non-hemolytic phospholipase C precursor                                | CBM32          |
| SGBXF1_00974 Maltodextrin glucosidase                                               | CBM34/GH<br>13 |
| SGBXF1_02944 putative kinase inhibitor                                              | CBM35          |
| SGBXF1_01247 putative kinase inhibitor protein                                      | CBM35          |
| SGBXF1_02134 Tail-specific protease precursor                                       | CBM48          |
| SGBXF1_03976 Curved DNA-binding protein                                             | CBM48          |
| SGBXF1_04582 Glycogen debranching enzyme                                            | CBM48          |
| SGBXF1_00632 Chaperone protein DnaJ                                                 | CBM48          |
| SGBXF1_03692 Co-chaperone protein HscB                                              | CBM48          |
| SGBXF1_04237 CYTH domain protein                                                    | CBM48          |
| SGBXF1_04583 1,4-alpha-glucan branching enzyme GlgB                                 | CBM48/GH<br>13 |
| SGBXF1_01367 Viral enhancin protein                                                 | CBM5           |
| SGBXF1_01620 Putrescine-binding periplasmic protein precursor                       | CBM50          |
| SGBXF1_04143 2',3'-cyclic-nucleotide 2'-phosphodiesterase/3'-nucleotidase precursor | CBM50          |
| SGBXF1_01417 Lipoprotein E precursor                                                | CBM50          |
| SGBXF1_02561 Fe(3+)-binding periplasmic protein precursor                           | CBM50          |
| SGBXF1_00532 putative L,D-transpeptidase YbiS precursor                             | CBM50          |
| SGBXF1_00593 Osmotically-inducible protein Y precursor                              | CBM50          |
| SGBXF1_04418 Maltose-binding periplasmic protein precursor                          | CBM50          |
| SGBXF1_02207 putative L,D-transpeptidase YcfS precursor                             | CBM50          |
| SGBXF1_03145 Phosphoglycerate transport regulatory protein PgtC precursor           | CBM50          |
| SGBXF1_01447 DNA protection during starvation protein                               | CBM50          |
| SGBXF1_00250 sn-glycerol-3-phosphate-binding periplasmic protein UgpB precursor     | CBM50          |
| SGBXF1_04635 Trifunctional nucleotide phosphoesterase protein YfkN precursor        | CBM50          |
| SGBXF1_01325 molybdate ABC transporter periplasmic molybdate-binding protein        | CBM50          |
| SGBXF1_00028 Phosphate-binding protein PstS precursor                               | CBM50          |
| SGBXF1_03924 N-acetylmuramoyl-L-alanine amidase AmiC precursor                      | CBM50          |
| SGBXF1_00760 Murein hydrolase activator NlpD precursor                              | CBM50          |
| SGBXF1_01242 Molybdate-binding periplasmic protein precursor                        | CBM50          |
| SGBXF1_02661 murein peptide amidase A                                               | CBM50          |
| SGBXF1_02327 fec operon regulator FecR                                              | CBM50          |
| SGBXF1_04491 Bacterioferritin                                                       | CBM50          |
| SGBXF1_02896 putative arabinose-binding protein precursor                           | CBM50          |
| SGBXF1_02821 Murein DD-endopeptidase MepM                                           | CBM50          |
| SGBXF1_01066 Trifunctional nucleotide phosphoesterase protein YfkN precursor        | CBM50          |
| SGBXF1_03533 Thiosulfate-binding protein precursor                                  | CBM50          |
| SGBXF1_04713 Sulfate-binding protein precursor                                      | CBM50          |
| SGBXF1_01603 D-alanyl-D-alanine carboxypeptidase DacC precursor                     | CBM50          |
| SGBXF1_02735 DNA protection during starvation protein                               | CBM50          |
| SGBXF1_00969 Phosphate-binding protein PstS precursor                               | CBM50          |
| SGBXF1_01964 Ferritin-1                                                             | CBM50          |
| SGBXF1_02599 Putative ABC transporter substrate-binding protein YesO                | CBM50          |
| SGBXF1_04728 Murein hydrolase activator EnvC precursor                              | CBM50          |
| SGBXF1_00395 2',3'-cyclic-nucleotide 2'-phosphodiesterase/3'-nucleotidase precursor | CBM50          |
| SGBXF1_00261 Tyrosine-protein phosphatase precursor                                 | CBM50          |
| SGBXF1_02333 putative ABC transporter-binding protein precursor                     | CBM50          |
| SGBXF1_02426 sn-glycerol-3-phosphate-binding periplasmic protein UgpB precursor     | CBM50          |
| SGBXF1_00370 N-acetylmuramoyl-L-alanine amidase AmiB precursor                      | CBM50          |
| SGBXF1_00330 Murein hydrolase activator NlpD precursor                              | CBM50          |
| SGBXF1_00481 hypothetical protein                                                   | CBM54          |
| SGBXF1_02511 Transglutaminase-like superfamily protein                              | CBM54          |
| SGBXF1_04433 Type I phosphodiesterase / nucleotide pyrophosphatase                  | CBM6           |
| SGBXF1_01126 Rare lipoprotein A precursor                                           | CBM63          |
| SGBXF1_03578 putative hydrolase                                                     | CE1            |

|                                                                              |      |
|------------------------------------------------------------------------------|------|
| SGBXF1_01033 Metallo-beta-lactamase superfamily protein                      | CE1  |
| SGBXF1_01693 putative metallo-hydrolase                                      | CE1  |
| SGBXF1_03836 putative quorum-quenching lactonase YtnP                        | CE1  |
| SGBXF1_04154 Ferri-bacillibactin esterase BesA                               | CE1  |
| SGBXF1_00042 Metallo-beta-lactamase superfamily protein                      | CE1  |
| SGBXF1_00833 Hydroxyacylglutathione hydrolase                                | CE1  |
| SGBXF1_03505 Enterochelin esterase                                           | CE1  |
| SGBXF1_01520 S-formylglutathione hydrolase YeiG                              | CE1  |
| SGBXF1_01676 Hydroxyacylglutathione hydrolase                                | CE1  |
| SGBXF1_03953 Metallo-beta-lactamase superfamily protein                      | CE1  |
| SGBXF1_02568 Carboxylesterase NlhH                                           | CE10 |
| SGBXF1_01212 Protein TolB                                                    | CE10 |
| SGBXF1_00843 L-lysine N6-monoxygenase                                        | CE10 |
| SGBXF1_02903 Carboxylesterase NlhH                                           | CE10 |
| SGBXF1_02394 Carboxylesterase NlhH                                           | CE10 |
| SGBXF1_03889 3-hydroxyacyl-[acyl-carrier-protein] dehydratase FabZ           | CE11 |
| SGBXF1_00663 RNA polymerase-associated protein RapA                          | CE11 |
| SGBXF1_00439 ATP-dependent RNA helicase DeaD                                 | CE11 |
| SGBXF1_04765 ATP-dependent DNA helicase RecG                                 | CE11 |
| SGBXF1_01258 UvrABC system protein B                                         | CE11 |
| SGBXF1_01273 ATP-dependent RNA helicase RhlE                                 | CE11 |
| SGBXF1_00700 UDP-3-O-[3-hydroxymyristoyl] N-acetylglucosamine deacetylase    | CE11 |
| SGBXF1_02627 ATP-dependent RNA helicase HrpB                                 | CE11 |
| SGBXF1_02853 ATP-dependent RNA helicase DbpA                                 | CE11 |
| SGBXF1_00208 ATP-dependent DNA helicase RecQ                                 | CE11 |
| SGBXF1_04696 Primosomal protein N'                                           | CE11 |
| SGBXF1_00169 ATP-dependent RNA helicase RhlB                                 | CE11 |
| SGBXF1_01716 3-hydroxydecanoyl-[acyl-carrier-protein] dehydratase            | CE11 |
| SGBXF1_02405 3-hydroxyacyl-[acyl-carrier-protein] dehydratase FabZ           | CE11 |
| SGBXF1_03293 UvrABC system protein B                                         | CE11 |
| SGBXF1_02028 Transcription-repair-coupling factor                            | CE11 |
| SGBXF1_03744 ATP-dependent RNA helicase SrmB                                 | CE11 |
| SGBXF1_01435 Flavin reductase like domain protein                            | CE14 |
| SGBXF1_01749 FMN reductase (NADH) RutF                                       | CE14 |
| SGBXF1_00572 4-hydroxyphenylacetate 3-monoxygenase reductase component       | CE14 |
| SGBXF1_00903 Flavin reductase like domain protein                            | CE14 |
| SGBXF1_01372 Acetyl-/propionyl-coenzyme A carboxylase alpha chain            | CE4  |
| SGBXF1_02854 Phosphoribosylglycinamide formyltransferase 2                   | CE4  |
| SGBXF1_01317 D-alanine--D-alanine ligase A                                   | CE4  |
| SGBXF1_00647 Carbamoyl-phosphate synthase large chain                        | CE4  |
| SGBXF1_00316 Phosphoribosylamine--glycine ligase                             | CE4  |
| SGBXF1_04093 Poly-beta-1,6-N-acetyl-D-glucosamine N-deacetylase precursor    | CE4  |
| SGBXF1_01618 Ribosomal protein S6 modification protein                       | CE4  |
| SGBXF1_03001 Basal-body rod modification protein FlgD                        | CE4  |
| SGBXF1_00696 D-alanine--D-alanine ligase                                     | CE4  |
| SGBXF1_00860 Uric acid degradation bifunctional protein                      | CE4  |
| SGBXF1_02335 Guanine deaminase                                               | CE9  |
| SGBXF1_00492 D-aminoacylase                                                  | CE9  |
| SGBXF1_04322 Allantoinase                                                    | CE9  |
| SGBXF1_02095 Imidazolonepropionase                                           | CE9  |
| SGBXF1_01910 Dihydroorotase                                                  | CE9  |
| SGBXF1_00099 N-isopropylammelide isopropyl amidohydrolase                    | CE9  |
| SGBXF1_01160 N-acetylglucosamine-6-phosphate deacetylase                     | CE9  |
| SGBXF1_01035 Adenine deaminase 2                                             | CE9  |
| SGBXF1_04534 Cytosine deaminase                                              | CE9  |
| SGBXF1_01398 N-substituted formamide deformylase precursor                   | CE9  |
| SGBXF1_00460 Alpha-D-ribose 1-methylphosphonate 5-triphosphate diphosphatase | CE9  |
| SGBXF1_01161 Glucosamine-6-phosphate deaminase                               | CE9  |
| SGBXF1_02110 Allantoinase                                                    | CE9  |
| SGBXF1_01635 3 beta-hydroxysteroid dehydrogenase/Delta 5-->4-isomerase       | GH1  |
| SGBXF1_01567 UDP-glucose 4-epimerase                                         | GH1  |
| SGBXF1_01082 UDP-glucose 4-epimerase                                         | GH1  |
| SGBXF1_01568 dTDP-glucose 4,6-dehydratase 2                                  | GH1  |
| SGBXF1_01168 UDP-glucose 4-epimerase                                         | GH1  |
| SGBXF1_01574 dTDP-4-dehydrorhamnose reductase                                | GH1  |
| SGBXF1_02748 UDP-glucose 4-epimerase                                         | GH1  |
| SGBXF1_02359 Aryl-phospho-beta-D-glucosidase BglC                            | GH1  |
| SGBXF1_02517 6-phospho-beta-glucosidase BglA                                 | GH1  |
| SGBXF1_00134 3 beta-hydroxysteroid dehydrogenase/Delta 5-->4-isomerase       | GH1  |

|                                                                                       |               |
|---------------------------------------------------------------------------------------|---------------|
| SGBXF1_04188 N,N'-diacetylchitobiose-specific phosphotransferase enzyme IIA component | GH1           |
| SGBXF1_00138 6-phospho-beta-glucosidase BglB                                          | GH1           |
| SGBXF1_00771 6-phospho-beta-glucosidase GmuD                                          | GH1           |
| SGBXF1_04187 Aryl-phospho-beta-D-glucosidase BglC                                     | GH1           |
| SGBXF1_00176 dTDP-glucose 4,6-dehydratase 2                                           | GH1           |
| SGBXF1_02396 3 beta-hydroxysteroid dehydrogenase/Delta 5-->4-isomerase                | GH1           |
| SGBXF1_01571 dTDP-4-dehydrorhamnose reductase                                         | GH1           |
| SGBXF1_01869 N,N'-diacetylchitobiose-specific phosphotransferase enzyme IIA component | GH1           |
| SGBXF1_02937 GDP-6-deoxy-D-talose 4-dehydrogenase                                     | GH1           |
| SGBXF1_02919 3 beta-hydroxysteroid dehydrogenase/Delta 5-->4-isomerase                | GH1           |
| SGBXF1_02308 Mannose-6-phosphate isomerase                                            | GH1           |
| SGBXF1_03476 Glucokinase                                                              | GH1           |
| SGBXF1_04530 N,N'-diacetylchitobiose-specific phosphotransferase enzyme IIA component | GH1           |
| SGBXF1_02231 hypothetical protein                                                     | GH10          |
| SGBXF1_03172 NAD(P)H azoreductase                                                     | GH10          |
| SGBXF1_04119 Protein SprT                                                             | GH10/CBM<br>1 |
| SGBXF1_03920 Membrane-bound lytic murein transglycosylase A precursor                 | GH102         |
| SGBXF1_01229 Aldose 1-epimerase                                                       | GH103         |
| SGBXF1_02802 Membrane-bound lytic murein transglycosylase B precursor                 | GH103         |
| SGBXF1_02774 Putative glucose-6-phosphate 1-epimerase                                 | GH103         |
| SGBXF1_03463 Membrane-bound lytic murein transglycosylase B precursor                 | GH103         |
| SGBXF1_02842 Putative oxidoreductase YceM                                             | GH109         |
| SGBXF1_02282 putative oxidoreductase YdgJ                                             | GH109         |
| SGBXF1_02603 Putative oxidoreductase YteT precursor                                   | GH109         |
| SGBXF1_04594 Inositol 2-dehydrogenase/D-chiro-inositol 3-dehydrogenase                | GH109         |
| SGBXF1_01397 Glucose-fructose oxidoreductase precursor                                | GH109         |
| SGBXF1_03415 Thiol:disulfide interchange protein DsbD precursor                       | GH109         |
| SGBXF1_03220 putative oxidoreductase YdgJ                                             | GH109         |
| SGBXF1_02409 Inositol 2-dehydrogenase                                                 | GH109         |
| SGBXF1_00341 Thiol:disulfide interchange protein DsbD precursor                       | GH109         |
| SGBXF1_02069 Glucose-6-phosphate 3-dehydrogenase                                      | GH109         |
| SGBXF1_04261 1,5-anhydro-D-fructose reductase                                         | GH109         |
| SGBXF1_03928 Protease 3 precursor                                                     | GH12          |
| SGBXF1_02598 hypothetical protein                                                     | GH123         |
| SGBXF1_03064 hypothetical protein                                                     | GH129         |
| SGBXF1_00061 Alpha-amylase precursor                                                  | GH13          |
| SGBXF1_02538 Oligo-1,6-glucosidase                                                    | GH13          |
| SGBXF1_00991 Riboflavin biosynthesis protein RibD                                     | GH13          |
| SGBXF1_03721 tRNA-specific adenosine deaminase                                        | GH13          |
| SGBXF1_01337 Alpha-amylase precursor                                                  | GH13          |
| SGBXF1_03544 transport protein TonB                                                   | GH13          |
| SGBXF1_02729 Filamentous hemagglutinin                                                | GH13          |
| SGBXF1_00474 Trehalose-6-phosphate hydrolase                                          | GH13          |
| SGBXF1_01534 Cytidine deaminase                                                       | GH13          |
| SGBXF1_03051 Benzoate 1,2-dioxygenase electron transfer component                     | GH130         |
| SGBXF1_00879 Na(+)-translocating NADH-quinone reductase subunit F                     | GH130         |
| SGBXF1_04709 Ferredoxin--NADP reductase                                               | GH130         |
| SGBXF1_01640 NADH oxidoreductase hcr                                                  | GH130         |
| SGBXF1_00277 NAD(P)H-flavin reductase                                                 | GH130         |
| SGBXF1_03094 1,2-phenylacetyl-CoA epoxidase, subunit E                                | GH130         |
| SGBXF1_03704 Flavohemoprotein                                                         | GH130         |
| SGBXF1_01178 KDP operon transcriptional regulatory protein KdpE                       | GH16          |
| SGBXF1_02620 Transcriptional regulatory protein RstA                                  | GH16          |
| SGBXF1_02040 Transcriptional regulatory protein PhoP                                  | GH16          |
| SGBXF1_00967 Phosphate regulon transcriptional regulatory protein PhoB                | GH16          |
| SGBXF1_04010 Swarming motility regulation protein RssB                                | GH16          |
| SGBXF1_04717 Alkaline phosphatase synthesis transcriptional regulatory protein PhoP   | GH16          |
| SGBXF1_03878 Transcriptional activator CadC                                           | GH16          |
| SGBXF1_03405 Transcriptional regulatory protein tctD                                  | GH16          |
| SGBXF1_04089 Transcriptional regulatory protein QseB                                  | GH16          |
| SGBXF1_02938 Heme response regulator HssR                                             | GH16          |
| SGBXF1_01466 DNA-binding transcriptional activator CadC                               | GH16          |
| SGBXF1_01464 Transcriptional activator protein CzrR                                   | GH16          |
| SGBXF1_03127 DNA-binding transcriptional activator CadC                               | GH16          |
| SGBXF1_04561 Transcriptional regulatory protein OmpR                                  | GH16          |
| SGBXF1_01474 Transcriptional regulatory protein YycF                                  | GH16          |
| SGBXF1_03526 Transcriptional regulatory protein OmpR                                  | GH16          |
| SGBXF1_03625 Transcriptional regulatory protein BaeR                                  | GH16          |

|                                                                                 |          |
|---------------------------------------------------------------------------------|----------|
| SGBXF1_00620 Aerobic respiration control protein ArcA                           | GH16     |
| SGBXF1_02559 Transcriptional regulatory protein QseB                            | GH16     |
| SGBXF1_04000 Transcriptional regulatory protein CreB                            | GH16     |
| SGBXF1_00420 Transcriptional regulatory protein BasR                            | GH16     |
| SGBXF1_00962 Transcriptional regulatory protein OmpR                            | GH16     |
| SGBXF1_02400 putative symporter YjMB                                            | GH17     |
| SGBXF1_04682 Hybrid peroxiredoxin hyPrx5                                        | GH18     |
| SGBXF1_01157 Chitinase D precursor                                              | GH18     |
| SGBXF1_00507 Valine--tRNA ligase                                                | GH18     |
| SGBXF1_00637 Isoleucine--tRNA ligase                                            | GH18     |
| SGBXF1_00976 putative peroxiredoxin                                             | GH18     |
| SGBXF1_04072 Thiol-disulfide oxidoreductase YkuV                                | GH18     |
| SGBXF1_02770 Chitinase A1 precursor                                             | GH18     |
| SGBXF1_03552 Chitinase B precursor                                              | GH18     |
| SGBXF1_01134 Leucine--tRNA ligase                                               | GH18     |
| SGBXF1_03448 Thiol:disulfide interchange protein DsbE                           | GH18     |
| SGBXF1_01539 Methionine--tRNA ligase                                            | GH18     |
| SGBXF1_02663 Thiol peroxidase                                                   | GH18     |
| SGBXF1_03585 Putative peroxiredoxin bcp                                         | GH18     |
| SGBXF1_00148 Chitinase A precursor                                              | GH18     |
| SGBXF1_04307 Inner membrane protein YrbG                                        | GH18     |
| SGBXF1_03550 hypothetical protein                                               | GH19     |
| SGBXF1_03205 Beta-galactosidase                                                 | GH2      |
| SGBXF1_01999 Evolved beta-galactosidase subunit alpha                           | GH2      |
| SGBXF1_02721 Tryptophan synthase alpha chain                                    | GH2      |
| SGBXF1_03268 Endonuclease 4                                                     | GH20     |
| SGBXF1_01166 Chitobiase precursor                                               | GH20     |
| SGBXF1_04601 Xylose isomerase-like TIM barrel                                   | GH20     |
| SGBXF1_02570 Inosose dehydratase                                                | GH20     |
| SGBXF1_04592 Inosose dehydratase                                                | GH20     |
| SGBXF1_04593 Xylose isomerase-like TIM barrel                                   | GH20     |
| SGBXF1_02410 Putative hydroxypyruvate isomerase YgbM                            | GH20     |
| SGBXF1_01456 Putative hydroxypyruvate isomerase YgbM                            | GH20     |
| SGBXF1_04038 L-ribulose-5-phosphate 3-epimerase UlaE                            | GH20     |
| SGBXF1_03648 Xylose isomerase-like TIM barrel                                   | GH20     |
| SGBXF1_03219 Xylose isomerase-like TIM barrel                                   | GH20     |
| SGBXF1_02068 Inosose dehydratase                                                | GH20     |
| SGBXF1_00479 Beta-hexosaminidase                                                | GH20     |
| SGBXF1_01936 Cystine-binding periplasmic protein precursor                      | GH23     |
| SGBXF1_04191 Endo-type membrane-bound lytic murein transglycosylase A precursor | GH23     |
| SGBXF1_01141 Glutamate/aspartate periplasmic-binding protein precursor          | GH23     |
| SGBXF1_01318 Lysine-arginine-ornithine-binding periplasmic protein precursor    | GH23     |
| SGBXF1_00033 ABC transporter glutamine-binding protein GlnH precursor           | GH23     |
| SGBXF1_02967 Cystine-binding periplasmic protein precursor                      | GH23     |
| SGBXF1_02155 Endo-type membrane-bound lytic murein transglycosylase A precursor | GH23     |
| SGBXF1_04383 Membrane-bound lytic murein transglycosylase F precursor           | GH23     |
| SGBXF1_03720 Membrane-bound lytic murein transglycosylase F precursor           | GH23     |
| SGBXF1_02418 Lysine-arginine-ornithine-binding periplasmic protein precursor    | GH23     |
| SGBXF1_03391 Lysine-arginine-ornithine-binding periplasmic protein precursor    | GH23     |
| SGBXF1_03767 Phage-related minor tail protein                                   | GH23     |
| SGBXF1_01802 Phage terminase large subunit                                      | GH23     |
| SGBXF1_02433 Cystine-binding periplasmic protein precursor                      | GH23     |
| SGBXF1_01703 Putative aliphatic sulfonates-binding protein precursor            | GH23     |
| SGBXF1_01629 Putative ABC transporter arginine-binding protein 2 precursor      | GH23     |
| SGBXF1_00832 Membrane-bound lytic murein transglycosylase D precursor           | GH23     |
| SGBXF1_00614 Soluble lytic murein transglycosylase precursor                    | GH23     |
| SGBXF1_03244 Lysine-arginine-ornithine-binding periplasmic protein precursor    | GH23     |
| SGBXF1_01626 ABC transporter arginine-binding protein 1 precursor               | GH23     |
| SGBXF1_04394 Cyclohexadienyl dehydratase precursor                              | GH23     |
| SGBXF1_01444 Glutamine-binding periplasmic protein precursor                    | GH23     |
| SGBXF1_00854 Cystine-binding periplasmic protein precursor                      | GH23     |
| SGBXF1_04138 Membrane-bound lytic murein transglycosylase C precursor           | GH23     |
| SGBXF1_00753 Glutamine-binding periplasmic protein precursor                    | GH23     |
| SGBXF1_01224 Autoinducer 2 sensor kinase/phosphatase LuxQ                       | GH23/GT2 |
| SGBXF1_01792 Lysozyme RrrD                                                      | GH24     |
| SGBXF1_03316 Lysozyme RrrD                                                      | GH24     |
| SGBXF1_01692 Peptidase M15                                                      | GH24     |
| SGBXF1_04197 Lysozyme RrrD                                                      | GH24     |
| SGBXF1_04704 Glycerol uptake facilitator protein                                | GH27     |

|                                                                               |          |
|-------------------------------------------------------------------------------|----------|
| SGBXF1_00936 Aquaporin Z                                                      | GH27     |
| SGBXF1_02342 Beta-lactamase                                                   | GH3      |
| SGBXF1_01321 Periplasmic beta-glucosidase precursor                           | GH3      |
| SGBXF1_03730 Holo-[acyl-carrier-protein] synthase                             | GH3      |
| SGBXF1_02302 Beta-lactamase                                                   | GH3      |
| SGBXF1_01941 Beta-hexosaminidase                                              | GH3      |
| SGBXF1_00573 D-alanyl-D-alanine-carboxypeptidase/endopeptidase AmpH precursor | GH3      |
| SGBXF1_00945 Shikimate kinase 2                                               | GH3      |
| SGBXF1_02381 D-alanyl-D-alanine dipeptidase                                   | GH3      |
| SGBXF1_04545 Shikimate kinase 1                                               | GH3      |
| SGBXF1_02306 Esterase EstB                                                    | GH3      |
| SGBXF1_03195 4'-phosphopantetheinyl transferase Npt                           | GH3      |
| SGBXF1_02399 Thermostable beta-glucosidase B                                  | GH3      |
| SGBXF1_02093 D-aminopeptidase                                                 | GH3      |
| SGBXF1_03340 Tyrosine-specific transport protein                              | GH31     |
| SGBXF1_04253 Tyrosine-specific transport protein                              | GH31     |
| SGBXF1_03277 Tryptophan-specific transport protein                            | GH31     |
| SGBXF1_03666 Alpha-xylosidase                                                 | GH31     |
| SGBXF1_01069 TraB family protein                                              | GH31     |
| SGBXF1_01871 Lichenan permease IIC component                                  | GH32     |
| SGBXF1_02002 Pseudouridine kinase                                             | GH32     |
| SGBXF1_03725 PTS system EIIBC component                                       | GH32     |
| SGBXF1_01928 PTS system glucose-specific EIICB component                      | GH32     |
| SGBXF1_02330 putative sugar kinase YdjH                                       | GH32     |
| SGBXF1_00475 PTS system trehalose-specific EIIBC component                    | GH32     |
| SGBXF1_04175 Sucrose-6-phosphate hydrolase                                    | GH32     |
| SGBXF1_01063 Inosine-guanosine kinase                                         | GH32     |
| SGBXF1_04193 pfkB family carbohydrate kinase                                  | GH32     |
| SGBXF1_02245 Pyridoxamine kinase                                              | GH32     |
| SGBXF1_01162 PTS system glucose-specific EIICBA component                     | GH32     |
| SGBXF1_00004 Ribokinase                                                       | GH32     |
| SGBXF1_00770 N,N'-diacetylchitobiose permease IIC component                   | GH32     |
| SGBXF1_04172 2-dehydro-3-deoxygluconokinase                                   | GH32     |
| SGBXF1_00137 PTS system beta-glucoside-specific EIICBA component              | GH32     |
| SGBXF1_04596 5-dehydro-2-deoxygluconokinase                                   | GH32     |
| SGBXF1_00064 2-dehydro-3-deoxygluconokinase                                   | GH32     |
| SGBXF1_00961 putative sugar kinase YdjH                                       | GH32     |
| SGBXF1_00075 PTS system mannitol-specific EIICBA component                    | GH32     |
| SGBXF1_03270 Tagatose-6-phosphate kinase                                      | GH32     |
| SGBXF1_02358 PTS system beta-glucoside-specific EIICBA component              | GH32     |
| SGBXF1_04189 Lichenan permease IIC component                                  | GH32     |
| SGBXF1_02299 PTS system maltose- and glucose-specific EIICB component         | GH32     |
| SGBXF1_04174 Negative regulator of SacY activity                              | GH32     |
| SGBXF1_02100 Sucrose-6-phosphate hydrolase                                    | GH32     |
| SGBXF1_04661 2-dehydro-3-deoxygluconokinase                                   | GH32     |
| SGBXF1_04235 Bifunctional protein HldE                                        | GH32/GT9 |
| SGBXF1_01843 4-hydroxy-tetrahydrodipicolinate synthase                        | GH33     |
| SGBXF1_02247 4-hydroxy-tetrahydrodipicolinate synthase                        | GH33     |
| SGBXF1_03583 4-hydroxy-tetrahydrodipicolinate synthase                        | GH33     |
| SGBXF1_03279 Mannonate dehydratase                                            | GH35     |
| SGBXF1_00531 Right origin-binding protein                                     | GH39     |
| SGBXF1_02566 HTH-type transcriptional activator Btr                           | GH39     |
| SGBXF1_02412 Regulatory protein PchR                                          | GH39     |
| SGBXF1_01844 HTH-type transcriptional regulator ChbR                          | GH39     |
| SGBXF1_03150 HTH-type transcriptional regulator CdhR                          | GH39     |
| SGBXF1_01948 Right origin-binding protein                                     | GH39     |
| SGBXF1_02975 Urease operon transcriptional activator                          | GH39     |
| SGBXF1_04332 HTH-type transcriptional repressor of iron proteins A            | GH39     |
| SGBXF1_03402 HTH-type transcriptional repressor of iron proteins A            | GH39     |
| SGBXF1_02281 Arabinose operon regulatory protein                              | GH39     |
| SGBXF1_02271 Right origin-binding protein                                     | GH39     |
| SGBXF1_02398 HTH-type transcriptional activator Btr                           | GH39     |
| SGBXF1_02625 HTH-type transcriptional repressor of iron proteins A            | GH39     |
| SGBXF1_03615 DNA-3-methyladenine glycosylase 2                                | GH39     |
| SGBXF1_00618 Right origin-binding protein                                     | GH39     |
| SGBXF1_02372 Transposon Tn10 TetD protein                                     | GH39     |
| SGBXF1_02882 Regulatory protein SoxS                                          | GH39     |
| SGBXF1_00909 Transcriptional activator FeaR                                   | GH39     |
| SGBXF1_03818 HTH-type transcriptional activator RhaR                          | GH39     |

|                                                                                           |      |
|-------------------------------------------------------------------------------------------|------|
| SGBXF1_01890 HTH-type transcriptional regulator GadX                                      | GH39 |
| SGBXF1_00570 HTH-type transcriptional activator Btr                                       | GH39 |
| SGBXF1_02261 Transcriptional activator FeaR                                               | GH39 |
| SGBXF1_00946 HTH-type transcriptional repressor of iron proteins A                        | GH39 |
| SGBXF1_04184 HTH-type transcriptional activator RhaS                                      | GH39 |
| SGBXF1_01334 HTH-type transcriptional activator RhaR                                      | GH39 |
| SGBXF1_01491 Right origin-binding protein                                                 | GH39 |
| SGBXF1_03981 HTH-type transcriptional activator RhaS                                      | GH39 |
| SGBXF1_00772 HTH-type transcriptional regulator ChbR                                      | GH39 |
| SGBXF1_03133 Bifunctional transcriptional activator/DNA repair enzyme AdaA                | GH39 |
| SGBXF1_02646 Bifunctional transcriptional activator/DNA repair enzyme Ada                 | GH39 |
| SGBXF1_00529 HTH-type transcriptional repressor of iron proteins A                        | GH39 |
| SGBXF1_01298 HTH-type transcriptional regulator CdhR                                      | GH39 |
| SGBXF1_04117 Right origin-binding protein                                                 | GH39 |
| SGBXF1_02540 Alpha-glucosidase                                                            | GH4  |
| SGBXF1_03132 Alpha-galactosidase                                                          | GH4  |
| SGBXF1_01870 putative 6-phospho-beta-glucosidase                                          | GH4  |
| SGBXF1_04531 putative 6-phospho-beta-glucosidase                                          | GH4  |
| SGBXF1_04774 Glutamine synthetase                                                         | GH5  |
| SGBXF1_00526 Gamma-glutamylputrescine synthetase PuaA                                     | GH5  |
| SGBXF1_03255 Gamma-glutamylputrescine synthetase PuaA                                     | GH5  |
| SGBXF1_02084 Gamma-glutamylputrescine synthetase PuaA                                     | GH5  |
| SGBXF1_02027 Diguanylate cyclase DosC                                                     | GH53 |
| SGBXF1_02411 D-galactose-binding periplasmic protein precursor                            | GH53 |
| SGBXF1_03946 HTH-type transcriptional regulator GalR                                      | GH53 |
| SGBXF1_00129 HTH-type transcriptional regulator DegA                                      | GH53 |
| SGBXF1_00477 HTH-type transcriptional regulator TreR                                      | GH53 |
| SGBXF1_02901 putative HTH-type transcriptional repressor ExuR                             | GH53 |
| SGBXF1_04697 HTH-type transcriptional repressor CytR                                      | GH53 |
| SGBXF1_01528 HTH-type transcriptional regulator GalS                                      | GH53 |
| SGBXF1_02067 Catabolite control protein A                                                 | GH53 |
| SGBXF1_04588 HTH-type transcriptional regulator GntR                                      | GH53 |
| SGBXF1_03668 Ribose operon repressor                                                      | GH53 |
| SGBXF1_00003 Ribose operon repressor                                                      | GH53 |
| SGBXF1_01538 Periplasmic binding proteins and sugar binding domain of LacI family protein | GH53 |
| SGBXF1_03948 HTH-type transcriptional regulator AscG                                      | GH53 |
| SGBXF1_01529 D-galactose-binding periplasmic protein precursor                            | GH53 |
| SGBXF1_01986 D-ribose-binding periplasmic protein precursor                               | GH53 |
| SGBXF1_04358 RNase E specificity factor CsrD                                              | GH53 |
| SGBXF1_04229 Maltose regulon regulatory protein Mall                                      | GH53 |
| SGBXF1_01104 putative diguanylate cyclase YdaM                                            | GH53 |
| SGBXF1_04031 hypothetical protein                                                         | GH53 |
| SGBXF1_00582 putative diguanylate cyclase YcdT                                            | GH53 |
| SGBXF1_03221 HTH-type transcriptional repressor PurR                                      | GH53 |
| SGBXF1_00958 D-ribose-binding periplasmic protein precursor                               | GH53 |
| SGBXF1_04176 Catabolite repressor/activator                                               | GH53 |
| SGBXF1_01119 putative diguanylate cyclase AdrA                                            | GH53 |
| SGBXF1_01698 Response regulator PleD                                                      | GH53 |
| SGBXF1_04629 Autoinducer 2-binding protein LsrB precursor                                 | GH53 |
| SGBXF1_00612 putative diguanylate cyclase YfiN                                            | GH53 |
| SGBXF1_03353 HTH-type transcriptional regulator GntR                                      | GH53 |
| SGBXF1_02099 HTH-type transcriptional repressor CytR                                      | GH53 |
| SGBXF1_00005 D-ribose-binding periplasmic protein precursor                               | GH53 |
| SGBXF1_03144 HTH-type transcriptional repressor CytR                                      | GH53 |
| SGBXF1_02533 putative diguanylate cyclase YcdT                                            | GH53 |
| SGBXF1_03264 Diguanylate cyclase DosC                                                     | GH53 |
| SGBXF1_00683 Catabolite repressor/activator                                               | GH53 |
| SGBXF1_00163 Phytochrome-like protein cph2                                                | GH53 |
| SGBXF1_03613 putative diguanylate cyclase YegE                                            | GH53 |
| SGBXF1_01998 HTH-type transcriptional regulator LacR                                      | GH53 |
| SGBXF1_01983 D-galactose-binding periplasmic protein precursor                            | GH53 |
| SGBXF1_04532 HTH-type transcriptional regulator GalS                                      | GH53 |
| SGBXF1_04412 Catabolite control protein A                                                 | GH53 |
| SGBXF1_04139 Phytochrome-like protein cph2                                                | GH53 |
| SGBXF1_02300 Maltose regulon regulatory protein Mall                                      | GH53 |
| SGBXF1_02220 HTH-type transcriptional repressor PurR                                      | GH53 |
| SGBXF1_03086 Phytochrome-like protein cph2                                                | GH53 |
| SGBXF1_00066 HTH-type transcriptional regulator KdgR                                      | GH53 |
| SGBXF1_03684 HTH-type transcriptional regulator GalS                                      | GH53 |

|                                                                         |           |
|-------------------------------------------------------------------------|-----------|
| SGBXF1_02278 L-arabinose-binding periplasmic protein precursor          | GH53      |
| SGBXF1_04653 Cyclic di-GMP phosphodiesterase Gmr                        | GH53      |
| SGBXF1_02436 Cyclic di-GMP phosphodiesterase Gmr                        | GH53      |
| SGBXF1_00104 Xylose operon regulatory protein                           | GH53/GH39 |
| SGBXF1_02445 putative diguanylate cyclase YegE                          | GH53/GT5  |
| SGBXF1_03037 Cupin superfamily protein                                  | GH55      |
| SGBXF1_02144 2-deoxyglucose-6-phosphate phosphatase                     | GH65      |
| SGBXF1_04772 Alpha-D-glucose-1-phosphate phosphatase YihX               | GH65      |
| SGBXF1_00036 6-phosphogluconate phosphatase                             | GH65      |
| SGBXF1_04540 Phosphoglycolate phosphatase                               | GH65      |
| SGBXF1_00604 Phosphoserine phosphatase                                  | GH65      |
| SGBXF1_00200 Flavin mononucleotide phosphatase YigB                     | GH65      |
| SGBXF1_03378 Sugar phosphatase YfbT                                     | GH65      |
| SGBXF1_01070 Copper-exporting P-type ATPase A                           | GH65      |
| SGBXF1_04554 GMP/IMP nucleotidase YrfG                                  | GH65      |
| SGBXF1_01158 Ribonucleotide monophosphatase NagD                        | GH65      |
| SGBXF1_01577 ?-D-glucose-1-phosphatase                                  | GH65      |
| SGBXF1_00478 Magnesium-transporting ATPase, P-type 1                    | GH65      |
| SGBXF1_03062 Magnesium-transporting ATPase, P-type 1                    | GH65      |
| SGBXF1_00866 Enolase-phosphatase E1                                     | GH65      |
| SGBXF1_02141 Phosphonoacetaldehyde hydrolase                            | GH65      |
| SGBXF1_00784 Fructose-1-phosphate phosphatase YqaB                      | GH65      |
| SGBXF1_01181 Potassium-transporting ATPase B chain                      | GH65      |
| SGBXF1_00222 Lead, cadmium, zinc and mercury-transporting ATPase        | GH65      |
| SGBXF1_04565 Ferrous iron transport protein B                           | GH72      |
| SGBXF1_03673 GTPase Der                                                 | GH72      |
| SGBXF1_00043 tRNA modification GTPase MnmE                              | GH72      |
| SGBXF1_00374 GTPase HflX                                                | GH72      |
| SGBXF1_03733 GTPase Era                                                 | GH72      |
| SGBXF1_02011 Ribosome-binding ATPase YchF                               | GH72      |
| SGBXF1_00418 GTPase ObgE/CgtA                                           | GH72      |
| SGBXF1_04780 putative GTP-binding protein EngB                          | GH72      |
| SGBXF1_01924 putative aminodeoxychorismate lyase                        | GH73      |
| SGBXF1_02995 Peptidoglycan hydrolase FlgJ                               | GH73      |
| SGBXF1_03630 putative zinc-type alcohol dehydrogenase-like protein YjmD | GH76      |
| SGBXF1_04397 Quinone oxidoreductase 1                                   | GH76      |
| SGBXF1_01350 Quinone oxidoreductase 1                                   | GH76      |
| SGBXF1_04388 Aldehyde reductase YahK                                    | GH76      |
| SGBXF1_03351 L-isonate 5-dehydrogenase (NAD(P)(+))                      | GH76      |
| SGBXF1_01978 Aryl-alcohol dehydrogenase                                 | GH76      |
| SGBXF1_04183 Alcohol dehydrogenase                                      | GH76      |
| SGBXF1_02660 Zinc-type alcohol dehydrogenase-like protein               | GH76      |
| SGBXF1_02428 Alcohol dehydrogenase 1                                    | GH76      |
| SGBXF1_04730 L-threonine 3-dehydrogenase                                | GH76      |
| SGBXF1_01521 S-(hydroxymethyl)glutathione dehydrogenase                 | GH76      |
| SGBXF1_03026 NADPH-dependent curcumin reductase                         | GH76      |
| SGBXF1_03075 Phthiocerol synthesis polyketide synthase type I PpsC      | GH76      |
| SGBXF1_04571 4-alpha-glucanotransferase                                 | GH77      |
| SGBXF1_00162 Cellulose synthase operon protein C precursor              | GH8       |
| SGBXF1_00161 Endoglucanase precursor                                    | GH8       |
| SGBXF1_03039 putative peptidase                                         | GH84      |
| SGBXF1_03901 Methionine aminopeptidase                                  | GH84      |
| SGBXF1_00447 Methionine aminopeptidase 1, mitochondrial                 | GH84      |
| SGBXF1_01315 Methionine aminopeptidase                                  | GH84      |
| SGBXF1_00281 Xaa-Pro dipeptidase                                        | GH84      |
| SGBXF1_04019 Xaa-Pro aminopeptidase                                     | GH84      |
| SGBXF1_02026 hypothetical protein                                       | GH9       |
| SGBXF1_02509 hypothetical protein                                       | GH9       |
| SGBXF1_00557 D-beta-hydroxybutyrate dehydrogenase                       | GH92      |
| SGBXF1_02079 Cyclopentanol dehydrogenase                                | GH92      |
| SGBXF1_01410 3-oxoacyl-[acyl-carrier-protein] reductase FabG            | GH92      |
| SGBXF1_02323 NADP-dependent 3-hydroxy acid dehydrogenase YdfG           | GH92      |
| SGBXF1_01393 3-oxoacyl-[acyl-carrier-protein] reductase FabG            | GH92      |
| SGBXF1_04382 Cyclic-di-GMP-binding biofilm dispersal mediator protein   | GH92      |
| SGBXF1_00826 3-oxoacyl-[acyl-carrier-protein] reductase FabG            | GH92      |
| SGBXF1_03638 Sorbitol-6-phosphate 2-dehydrogenase                       | GH92      |
| SGBXF1_01355 Acetoacetyl-CoA reductase                                  | GH92      |
| SGBXF1_03494 2,3-dihydro-2,3-dihydroxybenzoate dehydrogenase            | GH92      |

|                                                                                 |      |
|---------------------------------------------------------------------------------|------|
| SGBXF1_03052 2-(R)-hydroxypropyl-CoM dehydrogenase                              | GH92 |
| SGBXF1_00579 2,5-dichloro-2,5-cyclohexadiene-1,4-diol dehydrogenase             | GH92 |
| SGBXF1_00767 Glucose 1-dehydrogenase 1                                          | GH92 |
| SGBXF1_00136 3-oxoacyl-[acyl-carrier-protein] reductase FabG                    | GH92 |
| SGBXF1_03834 3-oxoacyl-[acyl-carrier-protein] reductase FabG                    | GH92 |
| SGBXF1_02710 putative oxidoreductase YciK                                       | GH92 |
| SGBXF1_04057 7-alpha-hydroxysteroid dehydrogenase                               | GH92 |
| SGBXF1_00559 (S)-1-Phenylethanol dehydrogenase                                  | GH92 |
| SGBXF1_03083 Glucose 1-dehydrogenase                                            | GH92 |
| SGBXF1_02440 C-factor                                                           | GH92 |
| SGBXF1_00575 2-keto-3-deoxy-L-fuconate dehydrogenase                            | GH92 |
| SGBXF1_03352 Gluconate 5-dehydrogenase                                          | GH92 |
| SGBXF1_01934 3-oxoacyl-[acyl-carrier-protein] reductase FabG                    | GH92 |
| SGBXF1_01920 3-oxoacyl-[acyl-carrier-protein] reductase FabG                    | GH92 |
| SGBXF1_04064 Pyridoxal 4-dehydrogenase                                          | GH92 |
| SGBXF1_04007 3-oxoacyl-[acyl-carrier-protein] reductase FabG                    | GH92 |
| SGBXF1_04437 Acetate operon repressor                                           | GH93 |
| SGBXF1_02138 Pectin degradation repressor protein KdgR                          | GH93 |
| SGBXF1_03041 Pca regulon regulatory protein                                     | GH93 |
| SGBXF1_02528 Pca regulon regulatory protein                                     | GH93 |
| SGBXF1_00949 Transcriptional regulator KdgR                                     | GH93 |
| SGBXF1_01276 HTH-type transcriptional regulator SrpS                            | GH93 |
| SGBXF1_04063 Pca regulon regulatory protein                                     | GH93 |
| SGBXF1_04028 HTH-type transcriptional regulator YiaJ                            | GH93 |
| SGBXF1_04761 Guanylate kinase                                                   | GH99 |
| SGBXF1_03887 Lipid-A-disaccharide synthase                                      | GT19 |
| SGBXF1_04088 Sensor protein QseC                                                | GT2  |
| SGBXF1_00955 Blue-light-activated protein                                       | GT2  |
| SGBXF1_04287 Aerobic respiration control sensor protein ArcB                    | GT2  |
| SGBXF1_01057 Chaperone protein HtpG                                             | GT2  |
| SGBXF1_03440 Phosphohistidine phosphatase SixA                                  | GT2  |
| SGBXF1_02039 Virulence sensor histidine kinase PhoQ                             | GT2  |
| SGBXF1_01714 3-oxoacyl-[acyl-carrier-protein] synthase 2                        | GT2  |
| SGBXF1_00819 Undecaprenyl-phosphate mannosyltransferase                         | GT2  |
| SGBXF1_04524 Acetylornithine/succinyldiaminopimelate aminotransferase           | GT2  |
| SGBXF1_00160 Cyclic di-GMP-binding protein precursor                            | GT2  |
| SGBXF1_02558 Sensor protein QseC                                                | GT2  |
| SGBXF1_03525 Sensor protein CpxA                                                | GT2  |
| SGBXF1_03431 3-oxoacyl-[acyl-carrier-protein] synthase 1                        | GT2  |
| SGBXF1_03718 Sensor histidine kinase GlrK                                       | GT2  |
| SGBXF1_00824 3-oxoacyl-[acyl-carrier-protein] synthase 2                        | GT2  |
| SGBXF1_01922 3-oxoacyl-[acyl-carrier-protein] synthase 2                        | GT2  |
| SGBXF1_01289 hypothetical protein                                               | GT2  |
| SGBXF1_00827 3-oxoacyl-[acyl-carrier-protein] synthase 2                        | GT2  |
| SGBXF1_00159 Cellulose synthase catalytic subunit [UDP-forming]                 | GT2  |
| SGBXF1_02856 putative glycosyltransferase EpsJ                                  | GT2  |
| SGBXF1_03838 Sensor histidine kinase CitA                                       | GT2  |
| SGBXF1_01087 Cysteine-tRNA ligase                                               | GT2  |
| SGBXF1_02176 Undecaprenyl-phosphate 4-deoxy-4-formamido-L-arabinose transferase | GT2  |
| SGBXF1_01251 Adenosylmethionine-8-amino-7-oxononanoate aminotransferase         | GT2  |
| SGBXF1_01227 2,3-bisphosphoglycerate-dependent phosphoglycerate mutase          | GT2  |
| SGBXF1_03657 Sensor protein TorS                                                | GT2  |
| SGBXF1_01465 Sensor protein CzcS precursor                                      | GT2  |
| SGBXF1_01562 Putative O-antigen transporter                                     | GT2  |
| SGBXF1_03019 Chemotaxis protein CheA                                            | GT2  |
| SGBXF1_00419 Sensor protein BasS                                                | GT2  |
| SGBXF1_02536 hypothetical protein                                               | GT2  |
| SGBXF1_04775 Nitrogen regulation protein NR(II)                                 | GT2  |
| SGBXF1_04718 Sensor protein CpxA                                                | GT2  |
| SGBXF1_04255 4-aminobutyrate aminotransferase PpuE                              | GT2  |
| SGBXF1_04737 putative glycosyltransferase EpsJ                                  | GT2  |
| SGBXF1_00985 Tetrathionate sensor histidine kinase TtrS                         | GT2  |
| SGBXF1_00715 Glutamate-1-semialdehyde 2,1-aminomutase                           | GT2  |
| SGBXF1_03472 Sensor histidine kinase YpdA                                       | GT2  |
| SGBXF1_04011 Swarming motility regulation sensor protein RssA                   | GT2  |
| SGBXF1_03988 2'-deamino-2'-hydroxyneamine transaminase                          | GT2  |
| SGBXF1_01179 Sensor protein KdpD                                                | GT2  |
| SGBXF1_00542 Omega-amino acid-pyruvate aminotransferase                         | GT2  |
| SGBXF1_02927 putative glycosyltransferase EpsJ                                  | GT2  |



|                                                                                                                                  |                  |
|----------------------------------------------------------------------------------------------------------------------------------|------------------|
| SGBXF1_03331 Phosphotransferase RcsD                                                                                             | GT2              |
| SGBXF1_00051 DNA gyrase subunit B                                                                                                | GT2              |
| SGBXF1_02444 Diaminobutyrate--2-oxoglutarate aminotransferase                                                                    | GT2              |
| SGBXF1_03999 Sensor protein CreC                                                                                                 | GT2              |
| SGBXF1_00263 Alpha-ribazole phosphatase                                                                                          | GT2              |
| SGBXF1_00968 Phosphate regulon sensor protein PhoR                                                                               | GT2              |
| SGBXF1_00724 Signal transduction histidine-protein kinase BarA                                                                   | GT2              |
| SGBXF1_02621 Sensor protein RstB                                                                                                 | GT2              |
| SGBXF1_04370 Lipid A biosynthesis lauroyl acyltransferase                                                                        | GT2              |
| SGBXF1_01919 Malonyl CoA-acyl carrier protein transacylase                                                                       | GT2              |
| SGBXF1_01578 putative glycosyl transferase                                                                                       | GT2              |
| SGBXF1_02926 putative glycosyltransferase EpsJ                                                                                   | GT2              |
| SGBXF1_04560 Osmolarity sensor protein EnvZ                                                                                      | GT2              |
| SGBXF1_03624 Signal transduction histidine-protein kinase BaeS                                                                   | GT2              |
| SGBXF1_02940 Nitrate/nitrite sensor protein NarX                                                                                 | GT2              |
| SGBXF1_02820 Lipid A biosynthesis (KDO)2-(lauroyl)-lipid IVA acyltransferase                                                     | GT2              |
| SGBXF1_03404 Sensor protein QseC                                                                                                 | GT2              |
| SGBXF1_04646 Autoinducer 2 sensor kinase/phosphatase LuxQ                                                                        | GT2              |
| SGBXF1_02933 colanic acid exporter                                                                                               | GT2              |
| SGBXF1_02929 Putative teichuronic acid biosynthesis glycosyltransferase TuaG                                                     | GT2              |
| SGBXF1_03564 Nitrate/nitrite sensor protein NarX                                                                                 | GT2              |
| SGBXF1_03333 Sensor histidine kinase RcsC                                                                                        | GT2              |
| SGBXF1_04745 putative glycosyl transferase                                                                                       | GT2              |
| SGBXF1_02932 hypothetical protein                                                                                                | GT2              |
| SGBXF1_01473 putative sensor histidine kinase TcrY                                                                               | GT2              |
| SGBXF1_02749 UDP-glucose 6-dehydrogenase TuaD                                                                                    | GT2              |
| SGBXF1_00175 UDP-N-acetyl-D-glucosamine 6-dehydrogenase                                                                          | GT2              |
| SGBXF1_02931 Undecaprenyl-phosphate 4-deoxy-4-formamido-L-arabinose transferase                                                  | GT2              |
| SGBXF1_01898 Lipid A biosynthesis lauroyl acyltransferase                                                                        | GT2              |
| SGBXF1_02895 Succinylornithine transaminase                                                                                      | GT2              |
| SGBXF1_00617 Phosphoserine phosphatase 1                                                                                         | GT2              |
| SGBXF1_01981 Sensor histidine kinase DcuS                                                                                        | GT2              |
| SGBXF1_01579 N-acetylglucosaminyl-diphospho-decaprenol L-rhamnosyltransferase                                                    | GT2              |
| SGBXF1_04209 DNA topoisomerase 4 subunit B                                                                                       | GT2              |
| SGBXF1_01885 Glucans biosynthesis glycosyltransferase H                                                                          | GT2              |
| SGBXF1_02064 Phthioceranic/hydroxyphthioceranic acid synthase                                                                    | GT2/GH76/<br>GT4 |
| SGBXF1_02217 Cyclopropane-fatty-acyl-phospholipid synthase                                                                       | GT2/GT4          |
| SGBXF1_01075 Cyclopropane-fatty-acyl-phospholipid synthase                                                                       | GT2/GT4          |
| SGBXF1_00525 Alpha, alpha-trehalose-phosphate synthase [UDP-forming]                                                             | GT20             |
| SGBXF1_02726 putative sulfate transporter/MT1781                                                                                 | GT26             |
| SGBXF1_00183 UDP-N-acetyl-D-mannosaminuronic acid transferase                                                                    | GT26             |
| SGBXF1_04302 putative phospholipid ABC transporter-binding protein MlaB                                                          | GT26             |
| SGBXF1_00689 UDP-N-acetylmuramoyl-L-alanyl-D-glutamate--2,6-diaminopimelate ligase                                               | GT28             |
| SGBXF1_00690 UDP-N-acetylmuramoyl-tripeptide--D-alanyl-D-alanine ligase                                                          | GT28             |
| SGBXF1_01127 Rod shape-determining protein RodA                                                                                  | GT28             |
| SGBXF1_00407 UDP-N-acetylmuramate-L-alanyl-gamma-D-glutamyl-meso-diaminopimelate ligase                                          | GT28             |
| SGBXF1_00692 UDP-N-acetylmuramoylalanine--D-glutamate ligase                                                                     | GT28             |
| SGBXF1_00694 UDP-N-acetylglucosamine--N-acetylmuramyl-(pentapeptide) pyrophosphoryl-undecaprenol N-acetylglucosamine transferase | GT28             |
| SGBXF1_00693 Lipid II flippase FtsW                                                                                              | GT28             |
| SGBXF1_00695 UDP-N-acetylmuramate--L-alanine ligase                                                                              | GT28             |
| SGBXF1_00174 UDP-N-acetylglucosamine 2-epimerase                                                                                 | GT28             |
| SGBXF1_04135 tRNA (guanine-N(7))-methyltransferase                                                                               | GT30             |
| SGBXF1_01581 6-phosphogluconate dehydrogenase, decarboxylating                                                                   | GT30             |
| SGBXF1_01678 Tetraacyldisaccharide 4'-kinase                                                                                     | GT30             |
| SGBXF1_04744 3-deoxy-D-manno-octulosonic acid transferase                                                                        | GT30             |
| SGBXF1_00980 Queuine tRNA-ribosyltransferase                                                                                     | GT34             |
| SGBXF1_04579 Maltodextrin phosphorylase                                                                                          | GT35             |
| SGBXF1_04572 Maltodextrin phosphorylase                                                                                          | GT35             |
| SGBXF1_03674 Outer membrane protein assembly factor BamB precursor                                                               | GT39             |
| SGBXF1_00528 Outer membrane protein assembly factor BamB                                                                         | GT39             |
| SGBXF1_02817 putative HTH-type transcriptional regulator YbbH                                                                    | GT4              |
| SGBXF1_03166 Inner membrane transport permease YbhS                                                                              | GT4              |
| SGBXF1_00026 Bifunctional protein GlmU                                                                                           | GT4              |
| SGBXF1_04581 Glucose-1-phosphate adenyltransferase                                                                               | GT4              |
| SGBXF1_00813 2-acyl-glycerophospho-ethanolamine acyltransferase                                                                  | GT4              |
| SGBXF1_03706 hypothetical protein                                                                                                | GT4              |
| SGBXF1_02597 2-acyl-glycerophospho-ethanolamine acyltransferase                                                                  | GT4              |

|                                                                                                                                 |      |
|---------------------------------------------------------------------------------------------------------------------------------|------|
| SGBXF1_01548 UTP--glucose-1-phosphate uridylyltransferase                                                                       | GT4  |
| SGBXF1_04372 Tyrocidine synthase 3                                                                                              | GT4  |
| SGBXF1_04094 Inner membrane transport permease YadH                                                                             | GT4  |
| SGBXF1_04407 Diacylglycerol kinase                                                                                              | GT4  |
| SGBXF1_01552 Glycosyl transferases group 1                                                                                      | GT4  |
| SGBXF1_00081 putative methyltransferase YcgJ                                                                                    | GT4  |
| SGBXF1_00777 Regulatory protein RecX                                                                                            | GT4  |
| SGBXF1_04283 DnaA initiator-associating protein DiaA                                                                            | GT4  |
| SGBXF1_00266 Ubiquinone/menaquinone biosynthesis C-methyltransferase UbiE                                                       | GT4  |
| SGBXF1_00211 Phospholipase YtpA                                                                                                 | GT4  |
| SGBXF1_01268 Inner membrane transport permease YbhR                                                                             | GT4  |
| SGBXF1_03807 Malonyl-[acyl-carrier protein] O-methyltransferase                                                                 | GT4  |
| SGBXF1_03045 3-oxoadipate enol-lactonase 2                                                                                      | GT4  |
| SGBXF1_04741 Lipopolysaccharide core biosynthesis protein RfaG                                                                  | GT4  |
| SGBXF1_00871 Phosphoheptose isomerase                                                                                           | GT4  |
| SGBXF1_00935 putative methyltransferase YcgJ                                                                                    | GT4  |
| SGBXF1_01750 Putative aminoacrylate hydrolase RutD                                                                              | GT4  |
| SGBXF1_01569 Glucose-1-phosphate thymidyltransferase 2                                                                          | GT4  |
| SGBXF1_01269 Inner membrane transport permease YbhS                                                                             | GT4  |
| SGBXF1_01962 Proline iminopeptidase                                                                                             | GT4  |
| SGBXF1_02346 N-formylmaleamate deformylase                                                                                      | GT4  |
| SGBXF1_00177 Glucose-1-phosphate thymidyltransferase 2                                                                          | GT4  |
| SGBXF1_04568 Pimeloyl-[acyl-carrier protein] methyl ester esterase                                                              | GT4  |
| SGBXF1_01554 D-inositol 3-phosphate glycosyltransferase                                                                         | GT4  |
| SGBXF1_01953 putative phosphatase YcdX                                                                                          | GT4  |
| SGBXF1_02930 GalNAc-alpha-(1->4)-GalNAc-alpha-(1->3)-diNAcBac-PP-undecaprenol alpha-1,4-N-acetyl-D-galactosaminyltransferase    | GT4  |
| SGBXF1_04742 N-acetylgalactosamine-N,N'-diacetylbacillosaminyl-diphospho-undecaprenol 4-alpha-N-acetylgalactosaminyltransferase | GT4  |
| SGBXF1_03885 DNA polymerase III subunit alpha                                                                                   | GT4  |
| SGBXF1_02750 UTP--glucose-1-phosphate uridylyltransferase                                                                       | GT4  |
| SGBXF1_04515 putative hydrolase                                                                                                 | GT4  |
| SGBXF1_03165 Inner membrane transport permease YbhR                                                                             | GT4  |
| SGBXF1_04408 Glycerol-3-phosphate acyltransferase                                                                               | GT4  |
| SGBXF1_00403 Gamma-glutamylcyclotransferase family protein YtfP                                                                 | GT4  |
| SGBXF1_01575 Teichoic acid translocation permease protein TagG                                                                  | GT4  |
| SGBXF1_02367 Haloalkane dehalogenase                                                                                            | GT4  |
| SGBXF1_01173 Esterase YbfF                                                                                                      | GT4  |
| SGBXF1_03503 Enterobactin synthase component F                                                                                  | GT4  |
| SGBXF1_00549 Phospholipase YtpA                                                                                                 | GT4  |
| SGBXF1_02835 tRNA (mo5U34)-methyltransferase                                                                                    | GT4  |
| SGBXF1_00916 Soluble epoxide hydrolase                                                                                          | GT4  |
| SGBXF1_04204 1-acyl-sn-glycerol-3-phosphate acyltransferase                                                                     | GT4  |
| SGBXF1_01565 Mannose-1-phosphate guanylyltransferase 1                                                                          | GT4  |
| SGBXF1_02569 Soluble epoxide hydrolase                                                                                          | GT4  |
| SGBXF1_03944 Bifunctional protein Aas                                                                                           | GT4  |
| SGBXF1_01563 UDP-galactopyranose mutase                                                                                         | GT4  |
| SGBXF1_01547 UTP--glucose-1-phosphate uridylyltransferase                                                                       | GT4  |
| SGBXF1_02074 Pentapeptide repeats (8 copies)                                                                                    | GT4  |
| SGBXF1_03175 N-acyltransferase YncA                                                                                             | GT41 |
| SGBXF1_03743 tRNA1(Val) (adenine(37)-N6)-methyltransferase                                                                      | GT41 |
| SGBXF1_00591 Mycothiol acetyltransferase                                                                                        | GT41 |
| SGBXF1_00068 putative N-acetyltransferase YjaB                                                                                  | GT41 |
| SGBXF1_01418 Mycothiol acetyltransferase                                                                                        | GT41 |
| SGBXF1_01595 putative acetyltransferase                                                                                         | GT41 |
| SGBXF1_00703 Protein translocase subunit SecA                                                                                   | GT41 |
| SGBXF1_03855 Acetyltransferase (GNAT) family protein                                                                            | GT41 |
| SGBXF1_01310 TDP-fucosamine acetyltransferase                                                                                   | GT41 |
| SGBXF1_02492 Acetyltransferase (GNAT) family protein                                                                            | GT41 |
| SGBXF1_03646 putative acetyltransferase                                                                                         | GT41 |
| SGBXF1_00589 Ribosomal RNA small subunit methyltransferase C                                                                    | GT41 |
| SGBXF1_00178 dTDP-fucosamine acetyltransferase                                                                                  | GT41 |
| SGBXF1_03808 Acetyltransferase (GNAT) family protein                                                                            | GT41 |
| SGBXF1_03983 Spermine/spermidine acetyltransferase                                                                              | GT41 |
| SGBXF1_00913 putative N-acetyltransferase YycN                                                                                  | GT41 |
| SGBXF1_01381 Protease synthase and sporulation negative regulatory protein PAI 1                                                | GT41 |
| SGBXF1_04574 putative acetyltransferase                                                                                         | GT41 |
| SGBXF1_02042 Acetyltransferase (GNAT) family protein                                                                            | GT41 |
| SGBXF1_01304 Phosphinothricin N-acetyltransferase                                                                               | GT41 |

|                                                                   |                |
|-------------------------------------------------------------------|----------------|
| SGBXF1_00941 Acetyltransferase (GNAT) family protein              | GT41           |
| SGBXF1_01341 MarR family protein                                  | GT41           |
| SGBXF1_04259 Ribosomal RNA large subunit methyltransferase G      | GT41           |
| SGBXF1_02534 Acetyltransferase (GNAT) family protein              | GT41           |
| SGBXF1_00506 Acetyltransferase (GNAT) family protein              | GT41           |
| SGBXF1_03538 Acetyltransferase YpeA                               | GT41           |
| SGBXF1_04155 putative acetyltransferase                           | GT41           |
| SGBXF1_01439 Mycothiol acetyltransferase                          | GT41           |
| SGBXF1_03438 50S ribosomal protein L3 glutamine methyltransferase | GT41           |
| SGBXF1_00301 Acetyltransferase (GNAT) family protein              | GT41           |
| SGBXF1_01416 Acetyltransferase                                    | GT41           |
| SGBXF1_04769 N-acetylglutamate synthase                           | GT41           |
| SGBXF1_01968 Acetyltransferase (GNAT) family protein              | GT41/CBM<br>26 |
| SGBXF1_03604 Spermidine N(1)-acetyltransferase                    | GT41/CBM<br>26 |
| SGBXF1_00378 Adenylosuccinate synthetase                          | GT47           |
| SGBXF1_01837 Purine efflux pump PbuE                              | GT48           |
| SGBXF1_04042 4-hydroxybenzoate transporter PcaK                   | GT48           |
| SGBXF1_03253 Low-affinity putrescine importer PlaP                | GT48           |
| SGBXF1_04519 putative galactarate transporter                     | GT48           |
| SGBXF1_04267 Hexuronate transporter                               | GT48           |
| SGBXF1_00736 Proline-specific permease ProY                       | GT48           |
| SGBXF1_02845 Multidrug resistance protein MdtH                    | GT48           |
| SGBXF1_02734 Methyl viologen resistance protein SmvA              | GT48           |
| SGBXF1_02001 Inner membrane transporter Ygjl                      | GT48           |
| SGBXF1_00739 4-hydroxybenzoate transporter PcaK                   | GT48           |
| SGBXF1_03858 Alpha-ketoglutarate permease                         | GT48           |
| SGBXF1_01841 Aspartate-proton symporter                           | GT48           |
| SGBXF1_00002 putative transport protein HsrA                      | GT48           |
| SGBXF1_04656 Inner membrane metabolite transport protein YhjE     | GT48           |
| SGBXF1_02314 Inner membrane transport protein YnfM                | GT48           |
| SGBXF1_02494 D-serine/D-alanine/glycine transporter               | GT48           |
| SGBXF1_02791 Multidrug resistance protein MdtL                    | GT48           |
| SGBXF1_04060 putative sulfoacetate transporter SauU               | GT48           |
| SGBXF1_02303 Inner membrane transport protein YdhP                | GT48           |
| SGBXF1_01537 Multidrug resistance protein MdtH                    | GT48           |
| SGBXF1_02086 Putrescine importer PuuP                             | GT48           |
| SGBXF1_03631 Hexuronate transporter                               | GT48           |
| SGBXF1_01167 Sugar efflux transporter A                           | GT48           |
| SGBXF1_04035 Putative tartrate transporter                        | GT48           |
| SGBXF1_03291 Bicyclomycin resistance protein                      | GT48           |
| SGBXF1_02515 Putative tartrate transporter                        | GT48           |
| SGBXF1_00063 Putative tartrate transporter                        | GT48           |
| SGBXF1_01010 mucopeptide transporter                              | GT48           |
| SGBXF1_00497 Arginine/ornithine antiporter                        | GT48           |
| SGBXF1_04670 Putative sialic acid transporter                     | GT48           |
| SGBXF1_04533 Protein TsgA                                         | GT48           |
| SGBXF1_01292 D-serine/D-alanine/glycine transporter               | GT48           |
| SGBXF1_00233 putative sulfoacetate transporter SauU               | GT48           |
| SGBXF1_00581 L-fucose-proton symporter                            | GT48           |
| SGBXF1_02867 Multidrug resistance protein stp                     | GT48           |
| SGBXF1_02402 Purine ribonucleoside efflux pump NepI               | GT48           |
| SGBXF1_03908 Putative niacin/nicotinamide transporter NaiP        | GT48           |
| SGBXF1_04600 D-xylose-proton symporter                            | GT48           |
| SGBXF1_02395 Multidrug resistance protein stp                     | GT48           |
| SGBXF1_01756 D-serine/D-alanine/glycine transporter               | GT48           |
| SGBXF1_00555 putative amino acid permease YhdG                    | GT48           |
| SGBXF1_00119 Reverse transcriptase (RNA-dependent DNA polymerase) | GT48           |
| SGBXF1_02874 Aromatic amino acid transport protein AroP           | GT48           |
| SGBXF1_03215 Putative multidrug resistance protein MdtD           | GT48           |
| SGBXF1_02325 putative transport protein HsrA                      | GT48           |
| SGBXF1_03623 Putative multidrug resistance protein MdtD           | GT48           |
| SGBXF1_00673 Sugar efflux transporter A                           | GT48           |
| SGBXF1_02617 Putative arginine/ornithine antiporter               | GT48           |
| SGBXF1_00453 Putrescine-ornithine antiporter                      | GT48           |
| SGBXF1_01873 Proline/betaine transporter                          | GT48           |
| SGBXF1_04707 Multidrug resistance protein D                       | GT48           |
| SGBXF1_00071 Hexuronate transporter                               | GT48           |

|                                                               |      |
|---------------------------------------------------------------|------|
| SGBXF1_03990 Multidrug resistance protein MdtL                | GT48 |
| SGBXF1_02502 Multidrug resistance protein 3                   | GT48 |
| SGBXF1_02319 Multidrug resistance protein 3                   | GT48 |
| SGBXF1_01430 Multidrug resistance protein stp                 | GT48 |
| SGBXF1_01664 putative MFS-type transporter YcaD               | GT48 |
| SGBXF1_03420 putative transporter                             | GT48 |
| SGBXF1_04068 putative sulfoacetate transporter SauU           | GT48 |
| SGBXF1_04411 Proline/betaine transporter                      | GT48 |
| SGBXF1_03845 Inner membrane transport protein YnfM            | GT48 |
| SGBXF1_01275 putative multidrug resistance protein EmrY       | GT48 |
| SGBXF1_02106 Proline/betaine transporter                      | GT48 |
| SGBXF1_03821 putative transport protein HsrA                  | GT48 |
| SGBXF1_04111 Aromatic amino acid transport protein AroP       | GT48 |
| SGBXF1_00146 Regulatory protein UhpC                          | GT48 |
| SGBXF1_03667 Hexuronate transporter                           | GT48 |
| SGBXF1_01896 Tetracycline resistance protein, class B         | GT48 |
| SGBXF1_03851 Multidrug export protein EmrB                    | GT48 |
| SGBXF1_02525 4-hydroxybenzoate transporter PcaK               | GT48 |
| SGBXF1_02218 Inner membrane transport protein YdhC            | GT48 |
| SGBXF1_01065 Fosmidomycin resistance protein                  | GT48 |
| SGBXF1_03951 Inner membrane transport protein YdhP            | GT48 |
| SGBXF1_03647 Inner membrane protein YihN                      | GT48 |
| SGBXF1_00095 Multidrug transporter MdfA                       | GT48 |
| SGBXF1_03546 Amino-acid permease RocC                         | GT48 |
| SGBXF1_02339 Putative tartrate transporter                    | GT48 |
| SGBXF1_01414 putative multidrug-efflux transporter/MT1670     | GT48 |
| SGBXF1_03105 putative transport protein YifK                  | GT48 |
| SGBXF1_03275 Sugar efflux transporter B                       | GT48 |
| SGBXF1_01004 Inner membrane transport protein YajR            | GT48 |
| SGBXF1_03877 putative cadaverine/lysine antiporter            | GT48 |
| SGBXF1_03214 Multidrug resistance protein stp                 | GT48 |
| SGBXF1_00774 putative MFS-type transporter YcaD               | GT48 |
| SGBXF1_00540 putative amino acid permease YhdG                | GT48 |
| SGBXF1_00184 putative transport protein YifK                  | GT48 |
| SGBXF1_00280 Inner membrane transport protein YdhC            | GT48 |
| SGBXF1_02526 4-hydroxybenzoate transporter PcaK               | GT48 |
| SGBXF1_03218 Sugar efflux transporter B                       | GT48 |
| SGBXF1_00569 Putative tartrate transporter                    | GT48 |
| SGBXF1_01330 Purine ribonucleoside efflux pump NepI           | GT48 |
| SGBXF1_00830 Inner membrane transport protein YdhP            | GT48 |
| SGBXF1_00971 Proline-specific permease ProY                   | GT48 |
| SGBXF1_03970 Hexuronate transporter                           | GT48 |
| SGBXF1_02137 Multidrug resistance protein stp                 | GT48 |
| SGBXF1_02343 Putative metabolite transport protein NicT       | GT48 |
| SGBXF1_02376 Tetracycline resistance protein, class C         | GT48 |
| SGBXF1_00214 Glycerol-3-phosphate transporter                 | GT48 |
| SGBXF1_03265 Lysine-specific permease                         | GT48 |
| SGBXF1_04234 Inner membrane protein YjeH                      | GT48 |
| SGBXF1_01426 Multidrug resistance protein stp                 | GT48 |
| SGBXF1_00629 Proline/betaine transporter                      | GT48 |
| SGBXF1_01834 Inner membrane transport protein RhmT            | GT48 |
| SGBXF1_03475 putative MFS-type transporter YhjX               | GT48 |
| SGBXF1_01081 Galactose-proton symporter                       | GT48 |
| SGBXF1_03217 Inner membrane metabolite transport protein YdjE | GT48 |
| SGBXF1_00329 Proton glutamate symport protein                 | GT49 |
| SGBXF1_04264 Serine/threonine transporter SstT                | GT49 |
| SGBXF1_02142 L-cystine uptake protein TcyP                    | GT49 |
| SGBXF1_00164 Aerobic C4-dicarboxylate transport protein       | GT49 |
| SGBXF1_04580 Glycogen synthase                                | GT5  |
| SGBXF1_02464 Formate hydrogenlyase transcriptional activator  | GT5  |
| SGBXF1_01019 ComE operon protein 1                            | GT5  |
| SGBXF1_03937 Phosphoenolpyruvate-protein phosphotransferase   | GT5  |
| SGBXF1_04563 30S ribosomal protein S1                         | GT5  |
| SGBXF1_04080 Penicillin-binding protein 1B                    | GT51 |
| SGBXF1_02389 Stage V sporulation protein D                    | GT51 |
| SGBXF1_02390 Peptidoglycan synthase FtsI precursor            | GT51 |
| SGBXF1_04551 Penicillin-binding protein 1A                    | GT51 |
| SGBXF1_04285 Penicillin-binding protein 2D                    | GT51 |
| SGBXF1_01128 Stage V sporulation protein D                    | GT51 |

|                                                                         |           |
|-------------------------------------------------------------------------|-----------|
| SGBXF1_00688 Peptidoglycan synthase FtsI precursor                      | GT51      |
| SGBXF1_03682 Penicillin-binding protein 1F                              | GT51      |
| SGBXF1_02586 Zinc transport protein ZntB                                | GT55      |
| SGBXF1_02654 Zinc transport protein ZntB                                | GT55      |
| SGBXF1_01594 Magnesium transport protein CorA                           | GT55      |
| SGBXF1_00203 Magnesium transport protein CorA                           | GT55      |
| SGBXF1_00181 4-alpha-L-fucosyltransferase                               | GT56      |
| SGBXF1_00312 Endonuclease V                                             | GT57      |
| SGBXF1_01291 hypothetical protein                                       | GT60      |
| SGBXF1_04529 Peptidyl-prolyl cis-trans isomerase A precursor            | GT66      |
| SGBXF1_01086 Peptidyl-prolyl cis-trans isomerase B                      | GT66      |
| SGBXF1_00032 Phosphate-specific transport system accessory protein PhoU | GT80      |
| SGBXF1_01684 3-deoxy-manno-octulosonate cytidyltransferase              | GT82      |
| SGBXF1_01095 hypothetical protein                                       | GT83      |
| SGBXF1_00908 Major phosphate-irrepressible acid phosphatase precursor   | GT83      |
| SGBXF1_01524 Major phosphate-irrepressible acid phosphatase precursor   | GT83      |
| SGBXF1_00607 hypothetical protein                                       | GT83      |
| SGBXF1_02702 Phosphatidylglycerophosphatase B                           | GT83      |
| SGBXF1_03349 N,N'-diacetylchitobiose phosphorylase                      | GT84/GH94 |
| SGBXF1_04213 ADP-ribose pyrophosphatase                                 | GT87      |
| SGBXF1_02858 putative Nudix hydrolase NudL                              | GT87      |
| SGBXF1_02227 Isopentenyl-diphosphate Delta-isomerase                    | GT87      |
| SGBXF1_04552 ADP compounds hydrolase NudE                               | GT87      |
| SGBXF1_02047 Phosphatase NudJ                                           | GT87      |
| SGBXF1_03938 RNA pyrophosphohydrolase                                   | GT87      |
| SGBXF1_00310 NADH pyrophosphatase                                       | GT87      |
| SGBXF1_03558 GDP-mannose pyrophosphatase NudK                           | GT87      |
| SGBXF1_03383 putative Nudix hydrolase YfcD                              | GT87      |
| SGBXF1_03272 RNA pyrophosphohydrolase                                   | GT87      |
| SGBXF1_01403 Nucleoside triphosphatase NudI                             | GT87      |
| SGBXF1_02761 CTP pyrophosphohydrolase                                   | GT87      |
| SGBXF1_02829 Dihydroneopterin triphosphate pyrophosphatase              | GT87      |
| SGBXF1_00704 8-oxo-dGTP diphosphatase                                   | GT87      |
| SGBXF1_00510 Lipopolysaccharide export system permease protein LptF     | GT9       |
| SGBXF1_04740 Lipopolysaccharide core heptosyltransferase RfaQ           | GT9       |
| SGBXF1_04743 Lipopolysaccharide core heptosyltransferase RfaQ           | GT9       |
| SGBXF1_04734 Lipopolysaccharide heptosyltransferase 1                   | GT9       |
| SGBXF1_01131 Nicotinate-nucleotide adenyltransferase                    | GT9       |
| SGBXF1_00511 Lipopolysaccharide export system permease protein LptG     | GT9       |
| SGBXF1_04738 ADP-heptose--LPS heptosyltransferase 2                     | GT9       |
| SGBXF1_04746 Phosphopantetheine adenyltransferase                       | GT9       |
| SGBXF1_04733 ADP-heptose--LPS heptosyltransferase 2                     | GT9       |
| SGBXF1_03181 Lipopolysaccharide core heptosyltransferase RfaQ           | GT9       |
| SGBXF1_00170 Thioredoxin-1                                              | GT90      |
| SGBXF1_03853 Thioredoxin-2                                              | GT90      |
| SGBXF1_01076 Thioredoxin                                                | GT90      |
| SGBXF1_03413 Sporulation thiol-disulfide oxidoreductase A precursor     | GT90/GH18 |

**Table S3-** Protease families predicted in the Merops database

| Locus tag    | MEROPS family name | MEROPS Reference | E value   |
|--------------|--------------------|------------------|-----------|
| SGBXF1_00638 | A08                | MER001313        | 1.20E-61  |
| SGBXF1_02943 | A24A               | MER000870        | 3.90E-20  |
| SGBXF1_02450 | A31                | MER002085        | 3.10E-60  |
| SGBXF1_01193 | C15                | MER001424        | 9.10E-60  |
| SGBXF1_03027 | C15                | MER001424        | 9.70E-51  |
| SGBXF1_00646 | C26                | MER115185        | 1.60E-78  |
| SGBXF1_00646 | C26                | MER436691        | 3.50E-05  |
| SGBXF1_00727 | C26                | MER065554        | 1.30E-141 |
| SGBXF1_01585 | C26                | MER065588        | 1.20E-93  |
| SGBXF1_02083 | C26                | MER031278        | 1.40E-117 |
| SGBXF1_02593 | C26                | MER043537        | 2.70E-05  |
| SGBXF1_02717 | C26                | MER043392        | 5.40E-79  |
| SGBXF1_03663 | C26                | MER045886        | 9.90E-53  |
| SGBXF1_04262 | C26                | MER043475        | 2.90E-14  |
| SGBXF1_04371 | C26                | MER437468        | 1.20E-19  |
| SGBXF1_04525 | C26                | MER043394        | 4.40E-72  |
| SGBXF1_02182 | C40                | MER002443        | 2.30E-56  |
| SGBXF1_02223 | C40                | MER004054        | 6.10E-61  |
| SGBXF1_03284 | C40                | MER004035        | 8.80E-56  |
| SGBXF1_00027 | C44                | MER003327        | 1.90E-102 |
| SGBXF1_01156 | C44                | MER034539        | 6.00E-112 |
| SGBXF1_03393 | C44                | MER011806        | 9.00E-42  |
| SGBXF1_04289 | C44                | MER198917        | 1.80E-82  |
| SGBXF1_01001 | C56                | MER010992        | 6.00E-14  |
| SGBXF1_01280 | C56                | MER031431        | 5.10E-15  |
| SGBXF1_02497 | C56                | MER014721        | 4.30E-51  |
| SGBXF1_03719 | C56                | MER042827        | 3.70E-23  |
| SGBXF1_04286 | C56                | MER160094        | 1.00E-18  |
| SGBXF1_00532 | C82                | MER107825        | 8.70E-71  |
| SGBXF1_00873 | C82                | MER152590        | 7.40E-51  |
| SGBXF1_02207 | C82                | MER107808        | 8.60E-52  |
| SGBXF1_01612 | I11                | MER018254        | 2.60E-57  |
| SGBXF1_02216 | I13                | MER029359        | 9.00E-05  |
| SGBXF1_00224 | I38                | MER018233        | 5.30E-43  |
| SGBXF1_02364 | I38                | MER018231        | 2.50E-15  |
| SGBXF1_03683 | I39                | MER034541        | 0.00E+00  |
| SGBXF1_01247 | I51                | MER028934        | 2.10E-10  |
| SGBXF1_02944 | I51                | MER028934        | 8.20E-08  |
| SGBXF1_02116 | I78                | MER059865        | 7.90E-06  |
| SGBXF1_00375 | I87                | MER192051        | 6.20E-169 |
| SGBXF1_00376 | I87                | MER191412        | 2.80E-137 |
| SGBXF1_01074 | I87                | MER192051        | 1.80E-12  |
| SGBXF1_01699 | M01                | MER001001        | 1.10E-117 |
| SGBXF1_01433 | M03A               | MER001161        | 8.80E-07  |
| SGBXF1_01433 | M03A               | MER001149        | 2.70E-06  |
| SGBXF1_02341 | M03A               | MER001158        | 1.30E-253 |
| SGBXF1_04637 | M03A               | MER001161        | 0.00E+00  |
| SGBXF1_03669 | M04                | MER115298        | 2.90E-175 |
| SGBXF1_04053 | M10A               | MER004909        | 6.10E-05  |
| SGBXF1_00223 | M10B               | MER001096        | 7.50E-106 |
| SGBXF1_02114 | M10B               | MER029131        | 1.50E-38  |
| SGBXF1_02115 | M10B               | MER029131        | 3.40E-05  |
| SGBXF1_02407 | M10B               | MER001096        | 7.40E-51  |
| SGBXF1_02661 | M14B               | MER030306        | 1.70E-71  |
| SGBXF1_03576 | M15B               | MER014983        | 8.50E-05  |
| SGBXF1_03550 | M15C               | MER030246        | 8.30E-12  |
| SGBXF1_03770 | M15C               | MER004957        | 4.50E-05  |
| SGBXF1_02381 | M15D               | MER027775        | 2.30E-20  |
| SGBXF1_03928 | M16A               | MER001222        | 4.80E-91  |
| SGBXF1_03928 | M16A               | MER078753        | 1.10E-14  |
| SGBXF1_03928 | M16A               | MER046874        | 9.90E-08  |
| SGBXF1_00165 | M16B               | MER001233        | 4.20E-14  |
| SGBXF1_00509 | M17                | MER001236        | 4.50E-269 |
| SGBXF1_02899 | M17                | MER001236        | 3.30E-49  |
| SGBXF1_03688 | M17                | MER002497        | 1.00E-183 |

|              |      |           |           |
|--------------|------|-----------|-----------|
| SGBXF1_03575 | M20A | MER001272 | 9.80E-87  |
| SGBXF1_03575 | M20A | MER001272 | 6.30E-46  |
| SGBXF1_04689 | M20A | MER001273 | 4.90E-86  |
| SGBXF1_04689 | M20A | MER001273 | 2.70E-42  |
| SGBXF1_02036 | M20B | MER001421 | 2.80E-188 |
| SGBXF1_03422 | M20B | MER001421 | 8.70E-71  |
| SGBXF1_00884 | M20C | MER001283 | 3.90E-232 |
| SGBXF1_01112 | M20D | MER002655 | 9.40E-100 |
| SGBXF1_03243 | M20D | MER002014 | 1.70E-69  |
| SGBXF1_04163 | M20D | MER003581 | 1.30E-120 |
| SGBXF1_04164 | M20D | MER014418 | 7.00E-14  |
| SGBXF1_04164 | M20D | MER014418 | 1.70E-09  |
| SGBXF1_04518 | M20D | MER002655 | 1.10E-79  |
| SGBXF1_00859 | M20X | MER026469 | 4.80E-48  |
| SGBXF1_02111 | M20X | MER026469 | 2.20E-50  |
| SGBXF1_02583 | M20X | MER026469 | 1.90E-51  |
| SGBXF1_00330 | M23B | MER015415 | 2.70E-25  |
| SGBXF1_00760 | M23B | MER015415 | 1.40E-26  |
| SGBXF1_02821 | M23B | MER003380 | 1.90E-121 |
| SGBXF1_04728 | M23B | MER005300 | 1.50E-40  |
| SGBXF1_01315 | M24A | MER001243 | 5.90E-74  |
| SGBXF1_03901 | M24A | MER001243 | 1.40E-136 |
| SGBXF1_00281 | M24B | MER001250 | 9.20E-132 |
| SGBXF1_03039 | M24B | MER004931 | 2.20E-33  |
| SGBXF1_04019 | M24B | MER001244 | 3.80E-122 |
| SGBXF1_00745 | M28C | MER001290 | 1.20E-129 |
| SGBXF1_02622 | M32  | MER069021 | 8.80E-145 |
| SGBXF1_01160 | M38  | MER033184 | 1.90E-47  |
| SGBXF1_01910 | M38  | MER061068 | 1.00E-143 |
| SGBXF1_02095 | M38  | MER033186 | 1.30E-50  |
| SGBXF1_02110 | M38  | MER015112 | 2.00E-16  |
| SGBXF1_02335 | M38  | MER037714 | 9.20E-43  |
| SGBXF1_00425 | M41  | MER001620 | 2.40E-151 |
| SGBXF1_02136 | M48B | MER002637 | 1.60E-99  |
| SGBXF1_03594 | M48C | MER031491 | 2.30E-94  |
| SGBXF1_04053 | M48C | MER002639 | 1.20E-80  |
| SGBXF1_03893 | M50B | MER004480 | 3.30E-87  |
| SGBXF1_03893 | M50B | MER004480 | 3.00E-54  |
| SGBXF1_01367 | M60  | MER042489 | 1.00E-113 |
| SGBXF1_03436 | M74  | MER001298 | 5.00E-105 |
| SGBXF1_01232 | M79  | MER056027 | 1.40E-08  |
| SGBXF1_02688 | M79  | MER059868 | 1.70E-09  |
| SGBXF1_03139 | M90  | MER217243 | 4.50E-108 |
| SGBXF1_03654 | N04  | MER187148 | 2.50E-10  |
| SGBXF1_03011 | N06  | MER181656 | 3.70E-120 |
| SGBXF1_00539 | P01  | MER013629 | 1.50E-38  |
| SGBXF1_04591 | P01  | MER035593 | 1.50E-14  |
| SGBXF1_02088 | S01A | MER098939 | 3.80E-06  |
| SGBXF1_02624 | S01A | MER005249 | 5.50E-83  |
| SGBXF1_00723 | S01C | MER001372 | 1.90E-117 |
| SGBXF1_03893 | S01C | MER001372 | 1.30E-05  |
| SGBXF1_04298 | S01C | MER001372 | 3.40E-142 |
| SGBXF1_04299 | S01C | MER001373 | 1.50E-70  |
| SGBXF1_04648 | S08A | MER000329 | 6.20E-65  |
| SGBXF1_04649 | S08A | MER000329 | 7.60E-58  |
| SGBXF1_04649 | S08A | MER000329 | 6.20E-10  |
| SGBXF1_01956 | S09A | MER000410 | 1.70E-120 |
| SGBXF1_02265 | S09A | MER005694 | 5.60E-68  |
| SGBXF1_03543 | S09A | MER000410 | 4.90E-103 |
| SGBXF1_02477 | S09B | MER058228 | 2.30E-05  |
| SGBXF1_02476 | S09C | MER034615 | 8.10E-07  |
| SGBXF1_02903 | S09C | MER043146 | 2.80E-31  |
| SGBXF1_04210 | S09C | MER107796 | 9.60E-85  |
| SGBXF1_00386 | S09X | MER034550 | 1.50E-68  |
| SGBXF1_01440 | S09X | MER037863 | 3.80E-06  |
| SGBXF1_01520 | S09X | MER061081 | 5.00E-122 |
| SGBXF1_02394 | S09X | MER031563 | 2.80E-31  |
| SGBXF1_02568 | S09X | MER033237 | 5.00E-23  |
| SGBXF1_02568 | S09X | MER034961 | 1.30E-06  |

|              |      |           |           |
|--------------|------|-----------|-----------|
| SGBXF1_03108 | S09X | MER031563 | 4.30E-32  |
| SGBXF1_03578 | S09X | MER065576 | 7.00E-26  |
| SGBXF1_01125 | S11  | MER000450 | 3.00E-147 |
| SGBXF1_01300 | S11  | MER000455 | 5.30E-130 |
| SGBXF1_01603 | S11  | MER000450 | 1.70E-158 |
| SGBXF1_02589 | S11  | MER043199 | 2.80E-65  |
| SGBXF1_02683 | S11  | MER000451 | 4.60E-131 |
| SGBXF1_00573 | S12  | MER004154 | 1.80E-130 |
| SGBXF1_02093 | S12  | MER000457 | 4.20E-12  |
| SGBXF1_02302 | S12  | MER000463 | 3.30E-85  |
| SGBXF1_02306 | S12  | MER006204 | 3.90E-92  |
| SGBXF1_02342 | S12  | MER026262 | 6.40E-20  |
| SGBXF1_00421 | S13  | MER000472 | 1.30E-226 |
| SGBXF1_01014 | S14  | MER000474 | 9.10E-113 |
| SGBXF1_02008 | S14  | MER000474 | 6.60E-71  |
| SGBXF1_02387 | S14  | MER002299 | 2.40E-07  |
| SGBXF1_00605 | S16  | MER014135 | 4.90E-139 |
| SGBXF1_01016 | S16  | MER000485 | 6.20E-133 |
| SGBXF1_01717 | S16  | MER003018 | 3.60E-99  |
| SGBXF1_02650 | S24  | MER000576 | 6.70E-37  |
| SGBXF1_03236 | S24  | MER000576 | 5.50E-28  |
| SGBXF1_03319 | S24  | MER037220 | 2.50E-08  |
| SGBXF1_04406 | S24  | MER000569 | 1.80E-62  |
| SGBXF1_03735 | S26A | MER000589 | 3.70E-120 |
| SGBXF1_00133 | S33  | MER036050 | 1.30E-05  |
| SGBXF1_00211 | S33  | MER036081 | 1.80E-09  |
| SGBXF1_00549 | S33  | MER033247 | 6.10E-25  |
| SGBXF1_00916 | S33  | MER004146 | 3.00E-13  |
| SGBXF1_01173 | S33  | MER031610 | 3.50E-42  |
| SGBXF1_01750 | S33  | MER004146 | 1.10E-10  |
| SGBXF1_01962 | S33  | MER000431 | 1.10E-87  |
| SGBXF1_02346 | S33  | MER031610 | 1.00E-10  |
| SGBXF1_02367 | S33  | MER017177 | 1.70E-11  |
| SGBXF1_02569 | S33  | MER031617 | 4.10E-17  |
| SGBXF1_02782 | S33  | MER213595 | 5.80E-08  |
| SGBXF1_03045 | S33  | MER210990 | 2.60E-08  |
| SGBXF1_03346 | S33  | MER034563 | 4.60E-59  |
| SGBXF1_04058 | S33  | MER037236 | 9.20E-10  |
| SGBXF1_04515 | S33  | MER059846 | 2.00E-129 |
| SGBXF1_04568 | S33  | MER017142 | 1.10E-106 |
| SGBXF1_02134 | S41A | MER001295 | 2.60E-91  |
| SGBXF1_02767 | S49A | MER001299 | 6.20E-241 |
| SGBXF1_02709 | S49B | MER001300 | 8.20E-82  |
| SGBXF1_00275 | S51  | MER001335 | 2.30E-39  |
| SGBXF1_04576 | S54  | MER015468 | 1.30E-56  |
| SGBXF1_03779 | S73  | MER150756 | 6.60E-18  |
| SGBXF1_04699 | T01B | MER001627 | 1.50E-85  |
| SGBXF1_01514 | T02  | MER003338 | 4.60E-59  |
| SGBXF1_02902 | T02  | MER017326 | 3.20E-28  |
| SGBXF1_00852 | T03  | MER223926 | 5.20E-94  |
| SGBXF1_00975 | T03  | MER001978 | 3.90E-145 |
| SGBXF1_02507 | T03  | MER001978 | 1.30E-105 |
| SGBXF1_00448 | U32  | MER037246 | 1.00E-126 |
| SGBXF1_00449 | U32  | MER013876 | 1.80E-18  |
| SGBXF1_03627 | U32  | MER003855 | 1.60E-44  |
| SGBXF1_03627 | U32  | MER003855 | 3.30E-15  |
| SGBXF1_04334 | U62  | MER016222 | 4.20E-206 |
| SGBXF1_04350 | U62  | MER016301 | 3.60E-222 |
| SGBXF1_01901 | U73  | MER492485 | 5.00E-71  |



**Table S4-** Genes involved in secretion systems

| Locus/operon tag | Gene/operon    | Product/putative product                            | Function/Putative function                  |
|------------------|----------------|-----------------------------------------------------|---------------------------------------------|
| SGBXF1_00703     | <i>secA</i>    | Preprotein translocase subunit<br>SecA              | Sec secretion system                        |
| SGBXF1_00702     | <i>secM</i>    | Secretion monitor                                   |                                             |
| SGBXF1_04724     | <i>secB</i>    | Preprotein translocase subunit<br>SecB              |                                             |
| SGBXF1_00982     | <i>secD</i>    | Preprotein translocase subunit<br>SecD              |                                             |
| SGBXF1_00983     | <i>secF</i>    | Preprotein translocase subunit<br>SecF              |                                             |
| SGBXF1_00428     | <i>secG</i>    | Protein-export membrane protein                     |                                             |
| SGBXF1_04469     | <i>secY</i>    | Preprotein translocase subunit<br>SecY              |                                             |
| SGBXF1_00269-72  | <i>tatABCD</i> | Sec-independent protein<br>translocase protein      | Twin-arginine translocation<br>(Tat) system |
| SGBXF1_01120     | <i>tatE</i>    | Sec-independent protein<br>translocase protein TatE |                                             |
| SGBXF1_01559-61  | <i>prsDEF</i>  | Protease secretion system proteins                  | Protease secretion system                   |

**Table S5-** Genes involved in metal transport and resistance

| <b>Locus tag/operon</b> | <b>Gene/operon</b> | <b>Product/putative product</b>                     | <b>Function/Putative function</b> |
|-------------------------|--------------------|-----------------------------------------------------|-----------------------------------|
| SGBXF1_01070            | <i>copA</i>        | Copper-exporting P-type ATPase A                    | Copper resistance                 |
| SGBXF1_01071            | <i>cueR</i>        | HTH-type transcriptional regulator                  |                                   |
| SGBXF1_01965-66         | <i>copCD</i>       | Copper resistance protein                           |                                   |
| SGBXF1_04098            | <i>cueO</i>        | Blue copper oxidase                                 |                                   |
| SGBXF1_03425-28         | <i>cusABCF</i>     | Cation efflux system proteins                       | Copper and silver resistance      |
| SGBXF1_00222            | <i>zntA</i>        | Lead, cadmium, zinc and mercury-transporting ATPase | Zinc and other metals resistance  |
| SGBXF1_02822-24         | <i>znuCBA</i>      | High-affinity zinc uptake system proteins           |                                   |
| SGBXF1_01223            | <i>zitB</i>        | Zinc transporter                                    |                                   |
| SGBXF1_02654            | <i>zntB</i>        | Zinc transport protein                              |                                   |
| SGBXF1_04231            | <i>zupT</i>        | Zinc transporter                                    |                                   |
| SGBXF1_01040-42         | <i>znuC, mntB</i>  | Zinc/manganese transport system elements            | Zinc and manganese resistance     |
| SGBXF1_00203            | <i>corA</i>        | Magnesium transport protein                         | Magnesium resistance              |
| SGBXF1_02866            | <i>mntP</i>        | Manganese efflux pump                               | Manganese resistance              |
| SGBXF1_03699            | <i>rcnA</i>        | Nickel/cobalt efflux protein                        | Nickel and cobalt resistance      |
| SGBXF1_02446            | <i>hoxN</i>        | High-affinity nickel transport protein              | Nickel resistance                 |
| SGBXF1_01242-44         | <i>modABC</i>      | Molybdenum transport system                         | Molybdate resistance              |
| SGBXF1_03053-55         | <i>arsCBR</i>      | Arsenate reductase                                  | Arsenate resistance               |
| SGBXF1_00039            | <i>chrR</i>        | Chromate reductase                                  | Chromate resistance               |
| SGBXF1_00912            | <i>tehB</i>        | Tellurite methyltransferase                         | Tellurium resistance              |

**Table S6-** Genes involved in siderophore production and iron transport

| Locus tag/operon   | Gene/operon                     | Product/putative product                                       | Function/Putative function                                                         |
|--------------------|---------------------------------|----------------------------------------------------------------|------------------------------------------------------------------------------------|
| SGBXF1_00842-46    | <i>iutA</i> ,<br><i>iucABCD</i> | Aerobactin production operon                                   | Siderophore production                                                             |
| SGBXF1_03494-03506 | <i>entABECF</i>                 | Enterobactin production operon                                 | Siderophore production                                                             |
| SGBXF1_00277       | <i>fre</i>                      | Ferrisiderophore reductase                                     | Iron release from siderophores                                                     |
| SGBXF1_02729       | <i>tonB</i>                     | Siderophore transmembrane transporter                          | Siderophore and other compounds transport                                          |
| SGBXF1_02787       | <i>foxA</i>                     | Ferrioxamine receptor                                          | Siderophore and iron transport                                                     |
| SGBXF1_03569       | <i>fpvA</i>                     | Ferripyoverdine receptor                                       | Siderophore and iron transport                                                     |
| SGBXF1_02326       | <i>fecA</i>                     | Fe <sup>(3+)</sup> dicitrate transport protein                 | Fe <sup>(3+)</sup> dicitrate transport                                             |
| SGBXF1_04076-79    | <i>fhuBCDA</i>                  | Fe <sup>(3+)</sup> -hydroxamate import ABC transporter complex | Iron transport                                                                     |
| SGBXF1_02561-63    | <i>fbpABC</i>                   | Fe <sup>(3+)</sup> ABC transporter complex                     | Iron transport                                                                     |
| SGBXF1_04564-66    | <i>feoABC</i>                   | Ferrous iron transport proteins                                | Fe <sup>2+</sup> ion uptake.                                                       |
| SGBXF1_02150-53    | <i>yfeABCD</i>                  | Periplasmic chelated iron-binding proteins                     | Chelated iron transport, manganese transport                                       |
| SGBXF1_02959-61    | <i>efeBOU</i>                   | Iron uptake system                                             | Fe <sup>2+</sup> ion uptake                                                        |
| SGBXF1_02201-06    | <i>sufABCDSE</i>                | FeS cluster assembly proteins and cysteine desulfurase         | May facilitate iron uptake from extracellular iron chelators under iron limitation |

**Table S7-**Genes involved in nitrogen, sulfur and phosphorous metabolism

| <b>Locus tag/operon</b>            | <b>Gene/operon name</b> | <b>Product/putative product</b>                        | <b>Function/Putative function</b>                             |
|------------------------------------|-------------------------|--------------------------------------------------------|---------------------------------------------------------------|
| SGBXF1_02921-24                    | <i>narIJHG</i>          | Respiratory nitrate reductase                          | Nitrate assimilation                                          |
| SGBXF1_02939-41                    | <i>narKXL</i>           | Nitrate/nitrite sensor and transporter                 | Nitrate assimilation, celular response to nitrate and nitrite |
| SGBXF1_03564                       | <i>narQP</i>            | Nitrate/nitrite sensor                                 | Nitrate assimilation                                          |
| SGBXF1_03559-61                    | <i>napABC</i>           | Periplasmic nitrate reductase                          | Nitrate assimilation                                          |
| SGBXF1_04535-37                    | <i>nirBDC</i>           | Nitrite reductase                                      | Nitrate assimilation                                          |
| SGBXF1_01028-29                    | <i>amtBR</i>            | Ammonia channel                                        | Ammonia uptake                                                |
| SGBXF1_04774                       | <i>glnA</i>             | Glutamine synthetase                                   | Ammonia assimilation cycle                                    |
| SGBXF1_04289-90                    | <i>gltBD</i>            | Glutamate synthase [NADPH]                             | Ammonia assimilation cycle                                    |
| SGBXF1_04775-76                    | <i>glnLG</i>            | Nitrogen regulation sensor                             | Nitrogen regulation                                           |
| SGBXF1_01371-72                    | <i>atzF, Dur1,2</i>     | Allophanate hydrolase<br>Urea amidolyase               | Hydrolysis of urea to ammonia and CO <sub>2</sub>             |
| SGBXF1_00746-49                    | <i>cysGDN</i>           | Sulfate adenyltransferase                              | Sulfate reduction                                             |
| SGBXF1_00742-44                    | <i>cysJIH</i>           | Sulfite reductase                                      | Sulfate reduction                                             |
| SGBXF1_03530-33                    | <i>cysAWTP</i>          | Sulfate/thiosulfate import ATP-binding proteins        | Sulfate transport                                             |
| SGBXF1_00984-88                    | <i>ttrRSBCA</i>         | Tetrathionate reductase and other components           | Tetrathionate reduction                                       |
| SGBXF1_00553-54                    | <i>atsAB</i>            | Arylsulfatase                                          | Arylsulfate ester degradation                                 |
| SGBXF1_01700-04                    | <i>ssuBCDAE</i>         | Alkanesulfonate monooxygenase and other components     | Alkanesulfonate degradation                                   |
| SGBXF1_01363-65                    | <i>ssuD</i>             | Alkanesulfonate monooxygenase                          | Alkanesulfonate degradation                                   |
| SGBXF1_04509-12                    | <i>tauDCBA</i>          | Taurine dioxygenase and other components               | Taurine and alkanesulfonate degradation                       |
| SGBXF1_01033                       | <i>bds1</i>             | Aryl/alkyl sulfatase                                   | Enables the use of SDS and 4-nitrocatechol as sulfur source   |
| SGBXF1_02968                       | <i>dcys</i>             | D-cysteine desulphydrase                               | Use of D-cysteine as sulfur source                            |
| SGBXF1_00028<br>SGBXF1_00969       | <i>pstS</i>             | Phosphate transport system substrate-binding protein   | Phosphate transport                                           |
| SGBXF1_00029-31<br>SGBXF1_03605-07 | <i>pstCAB</i>           |                                                        |                                                               |
| SGBXF1_01358-61                    | <i>phnCDE</i>           | phosphonate transport system substrate-binding protein | Phosphonate transport system                                  |
| SGBXF1_00457-67                    | <i>phnFGHIJKLMNOP</i>   | Phosphonates utilization proteins and other elements   | Phosphonate degradation                                       |

**Table S8-** Genes involved in the degradation of aromatic compounds and other xenobiotics

| Locus tag/operon                   | Gene/operon           | Product/putative product                                                        | Function/Putative function                                  |
|------------------------------------|-----------------------|---------------------------------------------------------------------------------|-------------------------------------------------------------|
| SGBXF1_03049-52                    | <i>cdbABCD</i>        | 2-halobenzoate 1,2-dioxygenase                                                  | Benzoate degradation                                        |
| SGBXF1_03046-48                    | <i>catBCA</i>         | Catechol 1,2-dioxygenase                                                        | Beta-ketoadipate pathway                                    |
| SGBXF1_03042-45                    | <i>pcaIJFD</i>        | 3-oxoadipate CoA-transferase                                                    |                                                             |
| SGBXF1_02519-20                    | <i>pcaGH</i>          | Protocatechuate 3,4-dioxygenase                                                 |                                                             |
| SGBXF1_02522-23                    | <i>pcaCB</i>          | 4-carboxymuconolactone decarboxylase, 3-carboxy-cis,cis-muconate cycloisomerase |                                                             |
| SGBXF1_02524                       | <i>pral</i>           | Hydroxybenzoate (4-HBA)-3-monoxygenase                                          | Degradation of 4-hydroxybenzoate (4HBA) via protocatechuate |
| SGBXF1_03089-103                   | <i>paaABCDEFGHIJK</i> | 1,2-phenylacetyl-CoA epoxidase and other elements                               | Phenylacetate degradation                                   |
| SGBXF1_00562-68                    | <i>hpcECBDGH</i>      | 3,4-dihydroxyphenylacetate 2,3-dioxygenase and other elements                   | 4-hydroxyphenylacetate degradation                          |
| SGBXF1_00571-72                    | <i>hpaBC</i>          | 4-hydroxyphenylacetate 3-monoxygenase oxygenase                                 |                                                             |
| SGBXF1_02237-38<br>SGBXF1_04338-39 | <i>aaeAB</i>          | p-hydroxybenzoic acid efflux pump                                               | Transport and elimination of aromatic compounds             |

**Table S9-** Genes involved in antibiotic resistance and multidrug efflux systems

| <b>Locus tag/operon</b>                               | <b>Gene/operon</b> | <b>Product/putative product</b>                                | <b>Function/Putative function</b>                           |
|-------------------------------------------------------|--------------------|----------------------------------------------------------------|-------------------------------------------------------------|
| SGBXF1_02302                                          | <i>ampC</i>        | Beta-lactamase                                                 | Cephalosporin resistance                                    |
| SGBXF1_02257                                          | <i>strA</i>        | Streptomycin 3''-kinase                                        | Streptomycin resistance                                     |
| SGBXF1_01065                                          | <i>fsr</i>         | Fosmidomycin resistance protein                                | Fosmidomycin resistance                                     |
| SGBXF1_03291                                          | <i>bcr</i>         | Bicyclomycin resistance protein                                | Bicyclomycin resistance                                     |
| SGBXF1_02877                                          | <i>fosA</i>        | Fosfomycin resistance protein                                  | Fosfomycin resistance                                       |
| SGBXF1_04240                                          | <i>uppP</i>        | Undecaprenyl pyrophosphate phosphatase                         | Bacitracin resistance                                       |
| SGBXF1_02175-81                                       | <i>arnBCADTEF</i>  | UDP-4-deoxy-4-formamido-beta-L-arabinose biosynthesis proteins | Resistance to polymyxin and cationic antimicrobial peptides |
| SGBXF1_00419-20                                       | <i>basSR</i>       | Two-component regulatory system BasS/BasR                      | Resistance to polymyxin and cationic antimicrobial peptides |
| SGBXF1_02230                                          | <i>pmrC</i>        | Phosphoethanolamine transferase                                | Resistance to polymyxin                                     |
| SGBXF1_01645-46<br>SGBXF1_01875-76<br>SGBXF1_03527-28 | <i>macAB</i>       | Macrolide export proteins                                      | Drug export                                                 |
| SGBXF1_01045-46                                       | <i>acrAB</i>       | Multidrug efflux pump proteins                                 | Drug transmembrane transport                                |
| SGBXF1_03567                                          | <i>acrB</i>        | Multidrug efflux pump subunit                                  |                                                             |
| SGBXF1_02499-501                                      | <i>oprM-mexAB</i>  | Multidrug resistance proteins                                  |                                                             |
| SGBXF1_01945-47                                       | <i>oqxABR</i>      | Multidrug efflux proteins                                      |                                                             |
| SGBXF1_03836-37                                       | <i>emrAB</i>       | Multidrug export proteins                                      |                                                             |
| SGBXF1_03620-25                                       | <i>mdtABCD</i>     | Multidrug export proteins                                      |                                                             |
| SGBXF1_01026-27                                       | <i>mdlAB</i>       | Multidrug resistance-like ATP-binding proteins                 | Xenobiotic transport and efflux                             |
| SGBXF1_02376                                          | <i>mdtG</i>        | Multidrug resistance protein                                   | Confers resistance against fosfomycin and deoxycholate      |
| SGBXF1_02214                                          | <i>mdtK</i>        | Multidrug resistance protein                                   | Drug transmembrane transport, antibiotic resistance         |
| SGBXF1_03990                                          | <i>mdtL</i>        | Multidrug resistance protein                                   | Confers resistance to chloramphenicol                       |
| SGBXF1_02845                                          | <i>mdtH</i>        | Multidrug resistance protein                                   | Confers resistance to norfloxacin and enoxacin              |
| SGBXF1_00095                                          | <i>mdfA</i>        | Multidrug transporter                                          | Drug transmembrane transport, antibiotic resistance         |

**Table S10-** Genes involved in secondary metabolites and antagonistic activities

| Locus tag/operon | Gene/operon    | Product/putative product                 | Function/Putative function                                                                   |
|------------------|----------------|------------------------------------------|----------------------------------------------------------------------------------------------|
| SGBXF1_00226-36  | -              | Bacteriocin/lantibiotic production genes | Bacteriocin production                                                                       |
| SGBXF1_00232     | -              | Bacteriocin/Lantibiotic dehydratase      |                                                                                              |
| SGBXF1_00897-901 | <i>nrps</i>    | Unknown                                  | Siderophore production?                                                                      |
| SGBXF1_04372     | <i>srwW</i>    | Serrawetin W1 synthase                   | Serrawetin W1 production                                                                     |
| SGBXF1_02064     | <i>t1pks</i>   | Type I polyketide synthase               | Unknown                                                                                      |
| SGBXF1_00148     | <i>chiA</i>    | Chitinase A                              | Hydrolysis of N-acetyl-beta-D-glucosaminide (1->4)-beta-linkages in chitin and chitodextrins |
| SGBXF1_02770     |                | Chitinase B                              |                                                                                              |
| SGBXF1_03552     |                | Chitinase D                              |                                                                                              |
| SGBXF1_01157     | <i>chiD</i>    | Chitinase D                              |                                                                                              |
| SGBXF1_01164     | <i>chiP</i>    | Chitoporin                               | Involved in the uptake of chitosugars                                                        |
| SGBXF1_01166     | <i>chB</i>     | Chitobiase                               | Digests the beta-1,4-glycosidic bonds in N-acetylglucosamine (GlcNAc) oligomers              |
| SGBXF1_03554     | <i>gbpA</i>    | Chitin and GlNAc-binding protein         | Promotes bacterial attachment to GlNAc residues and chitin                                   |
| SGBXF1_00333-36  | <i>prnABCD</i> | Tryptophan halogenase and other elements | Pyrrrolinrin production                                                                      |
| SGBXF1_01846-48  | <i>hcnABC</i>  | Hydrogen cyanide synthase and others     | Degradation of amino acids and production of HCN                                             |

**Table S11-** Genes involved in motility, chemotaxis, attachment and quorum-sensing

| Locus tag/operon             | Gene/operon              | Product/putative product                                                              | Function/Putative function                                  |
|------------------------------|--------------------------|---------------------------------------------------------------------------------------|-------------------------------------------------------------|
| SGBXF1_02993-03006           | <i>flgLKJIHGFEDCBAMN</i> | Flagellar basal-body rod proteins                                                     | Flagella biosynthesis                                       |
| SGBXF1_03009-11              | <i>flhEAB</i>            | Flagellar biosynthesis proteins                                                       |                                                             |
| SGBXF1_02969-74              | <i>fliZACDST</i>         | Flagellin and other flagellar proteins                                                | Flagellum-dependent cell motility                           |
| SGBXF1_02979-92              | <i>fliEFGHIJKLMNOPQR</i> | Flagellar proteins                                                                    |                                                             |
| SGBXF1_03022-23              | <i>flhCD</i>             | Flagellar transcriptional regulators                                                  | Flagella biosynthesis and flagellum-dependent cell motility |
| SGBXF1_03020-21              | <i>motBA</i>             | Motility proteins                                                                     | Motility                                                    |
| SGBXF1_04010-11              | <i>rssBA</i>             | Regulation of swarming motility proteins                                              | Regulation of swarming motility                             |
| SGBXF1_04372                 | <i>srwW</i>              | Serrawetin W1 synthase                                                                | Serrawetin W1 production, motility                          |
| SGBXF1_03012-15              | <i>cheZYBR</i>           | Chemotaxis proteins                                                                   | Chemotaxis                                                  |
| SGBXF1_03018-19              | <i>cheWA</i>             | Chemotaxis proteins                                                                   |                                                             |
| SGBXF1_03016                 | <i>tap</i>               | Methyl-accepting chemotaxis protein                                                   |                                                             |
| SGBXF1_03017                 | <i>tsr</i>               | Methyl-accepting chemotaxis protein                                                   |                                                             |
| SGBXF1_00405                 | <i>tar</i>               | Methyl-accepting chemotaxis protein                                                   |                                                             |
| SGBXF1_00451<br>SGBXF1_00083 | <i>tsr</i>               | Methyl-accepting chemotaxis protein                                                   |                                                             |
| SGBXF1_1467-72               | <i>ecpRABCDE</i>         | Fimbria proteins and other elements                                                   |                                                             |
| SGBXF1_01487-90              | <i>fimA, others</i>      | Fimbria A protein and other elements                                                  |                                                             |
| SGBXF1_03119-26              | <i>smfA, others</i>      | Fimbria A protein and other elements                                                  |                                                             |
| SGBXF1_04607-15              | <i>smfA, others</i>      | Fimbria A protein and other elements                                                  |                                                             |
| SGBXF1_00172-84              | <i>wec operon</i>        | Lipopolysaccharide biosynthesis proteins                                              | Lipopolysaccharide (LPS) biosynthesis                       |
| SGBXF1_01562-81              | <i>OA cluster</i>        | dTDP-4-dehydrorhamnose reductase and other elements                                   | O-antigen biosynthesis, LPS biosynthesis                    |
| SGBXF1_00510-11              | <i>lptFG</i>             | Lipopolysaccharide export system permease protein                                     | LPS export system                                           |
| SGBXF1_04308-9               | <i>kdsCD</i>             | 3-deoxy-D-manno-octulosonate 8-phosphate phosphatase, Arabinose 5-phosphate isomerase | LPS biosynthesis                                            |
| SGBXF1_04310-12              | <i>lptCAB</i>            | Lipopolysaccharide export system ATP-binding protein                                  | LPS export system                                           |
| SGBXF1_01547-56              | <i>wza wzb wzc</i>       | Tyrosine-protein kinase and glycosyl transferases                                     | Exopolysaccharide biosynthesis                              |
| SGBXF1_02925-37              | <i>eps, wzc</i>          | Tyrosine-protein kinase and glycosyl transferases                                     | Exopolysaccharide biosynthesis                              |
| SGBXF1_03349                 | <i>ndvB</i>              | Protein NdvB                                                                          | Involved in the production of beta-(1,2)-glucan             |
| SGBXF1_00159- 64             | <i>bcsGFQABZC</i>        | Cellulose synthase and other elements                                                 | Cellulose biosynthesis                                      |
| SGBXF1_04088-89              | <i>qseCB</i>             | Sensor proteins                                                                       | Quorum-sensing                                              |



|                              |             |                                              |                                                   |
|------------------------------|-------------|----------------------------------------------|---------------------------------------------------|
| SGBXF1_00787                 | <i>luxS</i> | S-ribosylhomocysteine lyase                  | Synthesis of autoinducer 2 (AI-2), quorum-sensing |
| SGBXF1_00210                 | <i>rhtB</i> | Homoserine/homoserine lactone efflux protein | Quorum-sensing                                    |
| SGBXF1_00292<br>SGBXF1_04493 | <i>tufA</i> | Elongation factor Tu                         | MAMP                                              |
| SGBXF1_00688<br>SGBXF1_02390 | <i>ftsI</i> | Peptidoglycan synthase                       | Peptidoglycan biosynthesis                        |

**Table S12-** Genes involved in major carbohydrate degradation pathways

| Locus tag/operon  | Gene/operon      | Product/putative product                                             | Function/Putative function                                                                                |
|-------------------|------------------|----------------------------------------------------------------------|-----------------------------------------------------------------------------------------------------------|
| SGBXF1_03118      | <i>gcd</i>       | Glucose dehydrogenase                                                | Glucose degradation                                                                                       |
| SGBXF1_03269-71   | <i>fruAKB</i>    | 1-phosphofructokinase and others                                     | Fructose degradation                                                                                      |
| SGBXF1_00100-101  | <i>xylAB</i>     | Xylulose kinase, Xylose isomerase                                    | Xylose degradation                                                                                        |
| SGBXF1_02276-77   | <i>araAB</i>     | L-arabinose isomerase, Ribulokinase                                  | Arabinose degradation                                                                                     |
| SGBXF1_00003-08   | <i>rbsRKBCAD</i> | Ribokinase and others                                                | Ribose degradation                                                                                        |
| SGBXF1_04571-72   | <i>malQP</i>     | 4-alpha-glucanotransferase, Maltodextrin phosphorylase               | Maltose degradation                                                                                       |
| SGBXF1_02308      | <i>manA</i>      | Mannose-6-phosphate isomerase                                        | Mannose degradation                                                                                       |
| SGBXF1_00474-5    | <i>treAB</i>     | Trehalose-6-phosphate hydrolase and transporter                      | Trehalose degradation                                                                                     |
| SGBXF1_01229-31   | <i>galMKT</i>    | Galactokinase and others                                             | Galactose degradation                                                                                     |
| SGBXF1_02100      | <i>sacA</i>      | Sucrose-6-phosphate hydrolase                                        | Sucrose degradation                                                                                       |
| SGBXF1_04175      | <i>scrB</i>      |                                                                      |                                                                                                           |
| SGBXF1_03205      | <i>lacZ</i>      | Beta-galactosidase                                                   | Lactose degradation                                                                                       |
| SGBXF1_01999-2000 | <i>ebgAC</i>     |                                                                      |                                                                                                           |
| SGBXF1_00960      | <i>gatY</i>      | D-tagatose-1,6-bisphosphate aldolase                                 | Galactitol catabolism                                                                                     |
| SGBXF1_03961      | <i>gatZ</i>      |                                                                      |                                                                                                           |
| SGBXF1_00075-77   | <i>mtlADR</i>    | Mannitol-1-phosphate 5-dehydrogenase and others                      | Mannitol degradation                                                                                      |
| SGBXF1_03635-38   | <i>slrAEBD</i>   | Sorbitol-6-phosphate 2-dehydrogenase and others                      | Sorbitol degradation                                                                                      |
| SGBXF1_01158-61   | <i>nagBACD</i>   | N-acetylglucosamine-6-phosphate deacetylase and others               | N-acetylglucosamine degradation                                                                           |
| SGBXF1_01166      | <i>chb</i>       | Chitobiase                                                           | Digests the beta-1,4-glycosidic bonds in N-acetylglucosamine (GlcNAc)                                     |
| SGBXF1_03957-62   | <i>PTS, kbaZ</i> | N-acetylgalactosamine permease, D-tagatose-1,6-bisphosphate aldolase | D-galactosamine degradation                                                                               |
| SGBXF1_00773      | <i>chbG</i>      | Chitooligosaccharide deacetylase                                     | Involved in the degradation of acetylated chitooligosaccharides chitobiose and chitotriose                |
| SGBXF1_02604-07   | <i>nagK</i>      | N-acetyl-D-glucosamine kinase and others                             | N-acetyl-D-galactosamine degradation                                                                      |
| SGBXF1_00061      | <i>malS</i>      | Amylase                                                              | Degradation of amylose, starch, amylopectin, and maltodextrins                                            |
| SGBXF1_01337      | <i>amyA</i>      | Amylase                                                              |                                                                                                           |
| SGBXF1_02540      | <i>palH</i>      | Alpha-glucosidase                                                    | Degrades maltose, palatinose, maltulose, trehalose, trehalulose, turanose, leucrose, sucrose and maltitol |
| SGBXF1_03131-32   | <i>melBA</i>     | Alpha-glucosidase                                                    | Maltose degradation                                                                                       |
| SGBXF1_02538      | <i>malL</i>      | Maltase, Isomaltase                                                  |                                                                                                           |
| SGBXF1_04417      | <i>malL</i>      | Oligo-1,6-glucosidase, Maltase                                       |                                                                                                           |
| SGBXF1_00974      | <i>malZ</i>      | Maltodextrin glucosidase                                             | Degrades maltotriose and longer maltodextrins with a chain length of up to 7 glucose units                |
| SGBXF1_01996      | <i>ygjK</i>      | Glucosidase                                                          | Nigerose degradation                                                                                      |
| SGBXF1_02399      | <i>bglB</i>      | Cellobiase                                                           | Cellobiose, Gentibiose degradation                                                                        |
| SGBXF1_01321      | <i>bglX</i>      | Beta-glucosidase                                                     | Hydrolysis of terminal, non-reducing beta-D-glucosyl                                                      |

|                              |             |                                 |                                                                                                           |
|------------------------------|-------------|---------------------------------|-----------------------------------------------------------------------------------------------------------|
|                              |             |                                 | residues with release of beta-D-glucose                                                                   |
| SGBXF1_00138                 | <i>blgB</i> | 6-phospho-beta-glucosidase      | Hydrolysis of phosphorylated beta-glucosides into glucose-6-phosphate (G-6-P) and aglycone                |
| SGBXF1_00771                 | <i>gmuD</i> | 6-phospho-beta-glucosidase      | Glucomannan degradation                                                                                   |
| SGBXF1_01870<br>SGBXF1_04531 | <i>chbF</i> | 6-phospho-beta-glucosidase      | Hydrolyzes a wide variety of P-beta-glucosides including cellobiose-6P, salicin-6P, arbutin-6P and others |
| SGBXF1_02517                 | <i>blgA</i> | 6-phospho-beta-glucosidase      | Hydrolysis of phosphorylated beta-glucosides into glucose-6-phosphate (G-6-P) and aglycone                |
| SGBXF1_02359<br>SGBXF1_04187 | <i>blgC</i> | Aryl-phospho-beta-D-glucosidase | Hydrolysis of aryl-phospho-beta-D-glucosides                                                              |

**Table S13-** Genes involved in sugars transport

| Locus tag/operon                             | Gene/operon         | Product/putative product                                                             | Function/Putative function                                                     |
|----------------------------------------------|---------------------|--------------------------------------------------------------------------------------|--------------------------------------------------------------------------------|
| SGBXF1_04418-20                              | <i>malEFG</i>       | Maltose/maltodextrin transport system                                                | Maltose/maltodextrin transport system                                          |
| SGBXF1_02539<br>SGBXF1_04416                 | <i>malk</i>         | Multiple sugar transport system<br>ATP-binding protein                               | Trehalose<br>Maltose/maltodextrin<br>transport system                          |
| SGBXF1_02329<br>SGBXF1_02900                 | <i>msmX</i>         | Multiple sugar transport system<br>ATP-binding protein                               | Maltose/maltodextrin<br>transport system, alpha-<br>Glucoside transport system |
| SGBXF1_02541                                 | <i>thuGFE</i>       | Trehalose/maltose transport system<br>proteins                                       | Trehalose/maltose transport<br>system                                          |
| SGBXF1_02278-80                              | <i>araFGH</i>       | L-arabinose transport system<br>proteins                                             | L-Arabinose transport system                                                   |
| SGBXF1_01529-31                              | <i>mglBAC</i>       | Methyl-galactoside transport system<br>substrate-binding protein                     | Methyl-galactoside transport<br>system                                         |
| SGBXF1_00005<br>SGBXF1_00958<br>SGBXF1_04031 | <i>rbsB</i>         | Ribose transport system<br>components                                                | Ribose transport system                                                        |
| SGBXF1_00006<br>SGBXF1_00957<br>SGBXF1_04030 | <i>rbsC</i>         |                                                                                      |                                                                                |
| SGBXF1_00007<br>SGBXF1_00956<br>SGBXF1_04029 | <i>rbsA</i>         |                                                                                      |                                                                                |
| SGBXF1_01928                                 | <i>ptsG</i>         | PTS system, glucose-specific<br>components                                           | PTS system, glucose                                                            |
| SGBXF1_03524                                 | <i>crr</i>          |                                                                                      |                                                                                |
| SGBXF1_01162                                 | <i>nagE</i>         | PTS system, N-acetylglucosamine-<br>specific IIA component                           | PTS system, N-<br>acetylglucosamine                                            |
| SGBXF1_02299                                 | <i>malX</i>         | PTS system, maltose/glucose-<br>specific IIB component                               | PTS system, maltose and<br>glucose                                             |
| SGBXF1_00475                                 | <i>treB</i>         | PTS system, trehalose-specific IIB<br>component                                      | PTS system, trehalose                                                          |
| SGBXF1_03269                                 | <i>fruA</i>         | PTS system, fructose-specific<br>components                                          | PTS system, fructose                                                           |
| SGBXF1_03271                                 | <i>fruB</i>         |                                                                                      |                                                                                |
| SGBXF1_00075                                 | <i>mtlA</i>         | PTS system, mannitol-specific IIA<br>component                                       | PTS system, mannitol                                                           |
| SGBXF1_01869<br>SGBXF1_04188<br>SGBXF1_04530 | <i>chbA</i>         | PTS system N,N'-<br>diacetylchitobiose-specific<br>components                        | PTS system N,N'-<br>diacetylchitobiose                                         |
| SGBXF1_00769                                 | <i>chbB</i>         |                                                                                      |                                                                                |
| SGBXF1_00770                                 | <i>chbC</i>         |                                                                                      |                                                                                |
| SGBXF1_01868<br>SGBXF1_04190                 | <i>celA or licB</i> | PTS system, cellobiose-specific IIB<br>component,<br>Lichenan permease               | PTS system, cellobiose,<br>lichenan                                            |
| SGBXF1_01871<br>SGBXF1_04189                 | <i>celB or licC</i> | PTS system, cellobiose-specific IIC<br>component,<br>Lichenan permease IIC component |                                                                                |
| SGBXF1_03637                                 | <i>srlB</i>         | PTS system, glucitol/sorbitol-<br>specific IIA component                             | PTS system, glucitol/sorbitol                                                  |
| SGBXF1_02862<br>SGBXF1_04227<br>SGBXF1_04226 | <i>manX</i>         | PTS system, mannose-specific<br>components                                           | PTS system, mannose                                                            |
| SGBXF1_02863<br>SGBXF1_04225                 | <i>manY</i>         |                                                                                      |                                                                                |
| SGBXF1_02864                                 | <i>manZ</i>         |                                                                                      |                                                                                |
| SGBXF1_03957                                 | <i>yadI</i>         | PTS system                                                                           | PTS system                                                                     |
| SGBXF1_03960                                 | <i>agaV</i>         |                                                                                      |                                                                                |

|                                              |                  |                                                           |                                          |
|----------------------------------------------|------------------|-----------------------------------------------------------|------------------------------------------|
| SGBXF1_03959                                 | <i>agaC</i>      | PTS system, N-acetylgalactosamine-specific components     | PTS system, N-acetylgalactosamine        |
| SGBXF1_03958                                 | <i>agaD</i>      |                                                           |                                          |
| SGBXF1_02289                                 | <i>ulaC</i>      | PTS system, ascorbate-specific component                  | PTS system, ascorbate                    |
| SGBXF1_02293                                 | <i>ulaB</i>      |                                                           |                                          |
| SGBXF1_02292                                 | <i>ulaA</i>      |                                                           |                                          |
| SGBXF1_02333<br>SGBXF1_02599<br>SGBXF1_02896 | <i>ABC.MS.S</i>  | Multiple sugar transport system substrate-binding protein | Putative multiple sugar transport system |
| SGBXF1_02332<br>SGBXF1_02600<br>SGBXF1_02897 | <i>ABC.MS.P</i>  | Multiple sugar transport system permease protein          |                                          |
| SGBXF1_02331<br>SGBXF1_02601<br>SGBXF1_02898 | <i>ABC.MS.P1</i> | Multiple sugar transport system permease protein          |                                          |
| SGBXF1_01538<br>SGBXF1_04629                 | <i>ABC.SS.S</i>  | Simple sugar transport system substrate-binding protein   | Putative simple sugar transport system   |
| SGBXF1_03259<br>SGBXF1_04631<br>SGBXF1_04632 | <i>ABC.SS.P</i>  | Simple sugar transport system permease protein            |                                          |
| SGBXF1_03258<br>SGBXF1_04630                 | <i>ABC.SS.A</i>  | Simple sugar transport system ATP-binding protein         |                                          |

**Table S14-** Genes involved in rhizopine transport and rhizopine and myo-inositol degradation

| Locus tag/operon                             | Gene/operon                  | Product/putative product                             | Function/Putative function                                                           |
|----------------------------------------------|------------------------------|------------------------------------------------------|--------------------------------------------------------------------------------------|
| SGBXF1_01983<br>SGBXF1_01986<br>SGBXF1_02411 | <i>mocB</i>                  | Rhizopine-binding protein                            | Involved in rhizopine (L-3-O-methyl-scylo-inosamine) catabolism                      |
| SGBXF1_02068                                 | <i>iolE</i> ,<br><i>mocC</i> | Inosose dehydratase<br>Rhizopine catabolism protein  | Dehydration of inosose,<br>Involved in rhizopine catabolism                          |
| SGBXF1_02409                                 | <i>iolX</i>                  | Scyllo-inositol 2-dehydrogenase                      | Oxidation of scyllo-inositol to 2,4,6/3,5-pentahydroxycyclohexanone (scyllo-inosose) |
| SGBXF1_04592                                 | <i>iolE</i>                  | Inosose dehydratase                                  | Myo-inositol degradation                                                             |
| SGBXF1_04593                                 | <i>iolH</i>                  | Protein IOHL                                         |                                                                                      |
| SGBXF1_04594                                 | <i>iolG</i>                  | Inositol 2-dehydrogenase                             |                                                                                      |
| SGBXF1_04595                                 | <i>iolD</i>                  | 3D-(3,5/4)-trihydroxycyclohexane-1,2-dione hydrolase |                                                                                      |
| SGBXF1_04596                                 | <i>iolC</i>                  | 5-dehydro-2-deoxygluconokinase                       |                                                                                      |
| SGBXF1_04598                                 | <i>iolB</i>                  | 5-deoxy-glucuronate isomerase                        |                                                                                      |
| SGBXF1_04599                                 | <i>iolA</i>                  | Methylmalonate semialdehyde dehydrogenase            |                                                                                      |

**Table S15-** Genes involved in organic and sugar acids degradation

| Locus tag/operon             | Gene/operon             | Product/putative product                     | Function/Putative function                             |
|------------------------------|-------------------------|----------------------------------------------|--------------------------------------------------------|
| SGBXF1_01196-99              | <i>sdhCBAD</i>          | Succinate dehydrogenase and others           | Succinate degradation                                  |
| SGBXF1_00411                 | <i>mdh</i>              | Malate dehydrogenase                         | Malate degradation                                     |
| SGBXF1_04442-44              | <i>aceKAB</i>           | Isocitrate lyase                             | Isocitrate degradation                                 |
| SGBXF1_00328                 | <i>acs</i>              | Acetyl-coenzyme A synthetase                 | Acetate degradation                                    |
| SGBXF1_04438<br>SGBXF1_04586 | <i>gntK</i>             | D-gluconate kinase                           | Gluconate degradation                                  |
| SGBXF1_02156-8               | <i>gadH</i>             | Gluconate dehydrogenase                      |                                                        |
| SGBXF1_00355-58              | <i>frdABCD</i>          | Fumarate reductase and others                | Fumarate degradation<br>Oxaloacetate degradation       |
| SGBXF1_02357                 | <i>odc</i>              | Oxalate decarboxylase                        | Oxalate degradation                                    |
| SGBXF1_02704                 | <i>acnA</i>             | Aconitate hydratase                          | Citrate degradation                                    |
| SGBXF1_04105                 | <i>acnB</i>             | Aconitate hydratase                          |                                                        |
| SGBXF1_03197-3203            | <i>citTGXFEDC</i>       | Citrate lyase and transporters               |                                                        |
| SGBXF1_02050                 | <i>icd</i>              | Isocitrate dehydrogenase [NADP]              | Oxaloacetate degradation                               |
| SGBXF1_04118                 | <i>fumA</i>             | Fumarate hydratase class I, aerobic          | Malate degradation and interconversion                 |
| SGBXF1_02310                 | <i>fumC</i>             | Fumarate hydratase class II                  |                                                        |
| SGBXF1_02447-58              | <i>fdhF, hyc operon</i> | Formate hydrogenlyase complex                | Formate degradation                                    |
| SGBXF1_04265                 | <i>uxaA</i>             | Altronate dehydratase                        | D-glucuronate, D-altronate, D-fructuronate degradation |
| SGBXF1_04266                 | <i>uxaC</i>             | Uronate isomerase                            |                                                        |
| SGBXF1_03279                 | <i>uxuA</i>             | Mannonate dehydratase                        |                                                        |
| SGBXF1_03280<br>SGBXF1_03632 | <i>uxuB</i>             | D-mannonate oxidoreductase                   |                                                        |
| SGBXF1_03629                 | <i>rspA</i>             | D-galactonate dehydratase family member RspA |                                                        |
| SGBXF1_00064<br>SGBXF1_04661 | <i>kdgK</i>             | 2-dehydro-3-deoxygluconokinase               |                                                        |
| SGBXF1_02815<br>SGBXF1_04441 | <i>eda</i>              | KHG/KDPG aldolase                            |                                                        |

**Table S16-** Genes involved in amino acid metabolism

| Locus tag/operon                             | Gene/operon  | Product/putative product                                              | Function/Putative function                                     |
|----------------------------------------------|--------------|-----------------------------------------------------------------------|----------------------------------------------------------------|
| SGBXF1_04023                                 | <i>serA</i>  | D-3-phosphoglycerate dehydrogenase                                    | Serine biosynthesis, glycerate-3P                              |
| SGBXF1_01671                                 | <i>serC</i>  | Phosphoserine aminotransferase                                        |                                                                |
| SGBXF1_00604                                 | <i>serB</i>  | Phosphoserine phosphatase                                             |                                                                |
| SGBXF1_04425                                 | <i>lysC</i>  | Aspartate kinase                                                      | Threonine biosynthesis, aspartate => homoserine => threonine   |
| SGBXF1_00622                                 | <i>thrA</i>  | Bifunctional aspartokinase / homoserine dehydrogenase                 |                                                                |
| SGBXF1_04692                                 | <i>metL</i>  | Bifunctional aspartokinase / homoserine dehydrogenase 2               |                                                                |
| SGBXF1_04584                                 | <i>asd</i>   | Aspartate-semialdehyde dehydrogenase                                  |                                                                |
| SGBXF1_00623                                 | <i>thrB1</i> | Homoserine kinase                                                     |                                                                |
| SGBXF1_00624                                 | <i>thrC</i>  | Threonine synthase                                                    |                                                                |
| SGBXF1_00504<br>SGBXF1_01482<br>SGBXF1_04153 | <i>betA</i>  | Choline dehydrogenase                                                 |                                                                |
| SGBXF1_01481<br>SGBXF1_04055                 | <i>betB</i>  | Betaine-aldehyde dehydrogenase                                        |                                                                |
| SGBXF1_04722                                 | <i>cysE</i>  | Serine O-acetyltransferase                                            | Cysteine biosynthesis, serine => cysteine                      |
| SGBXF1_01024<br>SGBXF1_03521                 | <i>cysK</i>  | Cysteine synthase A                                                   |                                                                |
| SGBXF1_03529                                 | <i>cysM</i>  | Cysteine synthase B                                                   |                                                                |
| SGBXF1_02968                                 | <i>dcys</i>  | D-cysteine desulfhydrase                                              | D-cysteine degradation                                         |
| SGBXF1_01602                                 | <i>cbs</i>   | Cystathionine beta-synthase                                           | Cysteine biosynthesis, homocysteine + serine => cysteine       |
| SGBXF1_01601                                 | <i>CTH</i>   | Cystathionine gamma-lyase [                                           |                                                                |
| SGBXF1_04425                                 | <i>lysC</i>  | Aspartate kinase                                                      | Methionine biosynthesis, aspartate => homoserine => methionine |
| SGBXF1_00622                                 | <i>thrA</i>  | Bifunctional aspartokinase / homoserine dehydrogenase                 |                                                                |
| SGBXF1_04692                                 | <i>metL</i>  | Bifunctional aspartokinase / homoserine dehydrogenase 2               |                                                                |
| SGBXF1_04584                                 | <i>asd</i>   | Aspartate-semialdehyde dehydrogenase                                  |                                                                |
| SGBXF1_04445                                 | <i>metA</i>  | Homoserine O-succinyltransferase                                      |                                                                |
| SGBXF1_04693                                 | <i>metB</i>  | Cystathionine gamma-synthase                                          |                                                                |
| SGBXF1_04180                                 | <i>metC</i>  | Cystathionine beta-lyase                                              |                                                                |
| SGBXF1_04436                                 | <i>metH</i>  | 5-methyltetrahydrofolate--homocysteine methyltransferase              |                                                                |
| SGBXF1_00258<br>SGBXF1_03163                 | <i>metE</i>  | 5-methyltetrahydropteroyltriglutamate--homocysteine methyltransferase |                                                                |
| SGBXF1_04075                                 | <i>metK</i>  | S-adenosylmethionine synthetase                                       |                                                                |
| SGBXF1_04101                                 | <i>speD</i>  | S-adenosylmethionine decarboxylase                                    | Methionine salvage pathway                                     |
| SGBXF1_04100                                 | <i>speE</i>  | Spermidine synthase                                                   |                                                                |
| SGBXF1_00721<br>SGBXF1_01611                 | <i>mtnN</i>  | Adenosylhomocysteine nucleosidase                                     |                                                                |
| SGBXF1_00869                                 | <i>mtnK</i>  | 5-methylthioribose kinase                                             |                                                                |
| SGBXF1_00868                                 | <i>mtnA</i>  | Methylthioribose-1-phosphate isomerase                                |                                                                |
| SGBXF1_00865                                 | <i>mtnB</i>  | Methylthioribulose-1-phosphate dehydratase                            |                                                                |
| SGBXF1_00866                                 | <i>mtnC</i>  | Enolase-phosphatase E1                                                |                                                                |
| SGBXF1_00867                                 | <i>mtnD</i>  | 1,2-dihydroxy-3-keto-5-methylthiopentene dioxygenase                  |                                                                |
| SGBXF1_03106<br>SGBXF1_04392                 | <i>tyrB</i>  | Aromatic-amino-acid transaminase                                      |                                                                |



|                                                                                                              |              |                                                                             |                                                                                   |
|--------------------------------------------------------------------------------------------------------------|--------------|-----------------------------------------------------------------------------|-----------------------------------------------------------------------------------|
| SGBXF1_00667<br>SGBXF1_00681<br>SGBXF1_02340<br>SGBXF1_03358<br>SGBXF1_03508<br>SGBXF1_04054<br>SGBXF1_04669 | <i>ilvL</i>  | Acetolactate synthase I/III/III large subunit                               | Valine/isoleucine biosynthesis, pyruvate => valine / 2-oxobutanoate => isoleucine |
| SGBXF1_00666<br>SGBXF1_00682                                                                                 | <i>ilvH</i>  | Acetolactate synthase I/III small subunit                                   |                                                                                   |
| SGBXF1_04668                                                                                                 | <i>ilvM</i>  | Acetolactate synthase II small subunit                                      |                                                                                   |
| SGBXF1_04662                                                                                                 | <i>ilvC</i>  | Ketol-acid reductoisomerase                                                 |                                                                                   |
| SGBXF1_04666                                                                                                 | <i>ilvD</i>  | Dihydroxy-acid dehydratase                                                  |                                                                                   |
| SGBXF1_04667                                                                                                 | <i>ilvE</i>  | Branched-chain amino acid aminotransferase                                  |                                                                                   |
| SGBXF1_00678<br>SGBXF1_01889                                                                                 | <i>leuA</i>  | 2-isopropylmalate synthase                                                  | Leucine biosynthesis, 2-oxoisovalerate => 2-oxoisocaproate                        |
| SGBXF1_00676                                                                                                 | <i>leuC</i>  | 3-isopropylmalate/(R)-2-methylmalate dehydratase large subunit              |                                                                                   |
| SGBXF1_00675                                                                                                 | <i>leuD</i>  | 3-isopropylmalate/(R)-2-methylmalate dehydratase small subunit              |                                                                                   |
| SGBXF1_00677                                                                                                 | <i>leuB</i>  | 3-isopropylmalate dehydrogenase                                             |                                                                                   |
| SGBXF1_04425                                                                                                 | <i>lysC</i>  | Aspartate kinase                                                            | Lysine biosynthesis, succinyl-DAP pathway, aspartate => lysine                    |
| SGBXF1_00622                                                                                                 | <i>thrA</i>  | Bifunctional aspartokinase / homoserine dehydrogenase 1                     |                                                                                   |
| SGBXF1_04692                                                                                                 | <i>metL</i>  | Bifunctional aspartokinase / homoserine dehydrogenase 2                     |                                                                                   |
| SGBXF1_04584                                                                                                 | <i>asd</i>   | Aspartate-semialdehyde dehydrogenase                                        |                                                                                   |
| SGBXF1_02247<br>SGBXF1_03583                                                                                 | <i>dapA</i>  | 4-hydroxy-tetrahydrodipicolinate synthase                                   |                                                                                   |
| SGBXF1_00645                                                                                                 | <i>dapB</i>  | 4-hydroxy-tetrahydrodipicolinate reductase                                  |                                                                                   |
| SGBXF1_03903                                                                                                 | <i>dapD</i>  | 2,3,4,5-tetrahydropyridine-2-carboxylate N-succinyltransferase              |                                                                                   |
| SGBXF1_04524                                                                                                 | <i>argD</i>  | Acetylornithine/N-succinyldiaminopimelate aminotransferase                  |                                                                                   |
| SGBXF1_03575                                                                                                 | <i>dapE</i>  | Succinyl-diaminopimelate desuccinylase                                      |                                                                                   |
| SGBXF1_00197                                                                                                 | <i>dapF</i>  | Diaminopimelate epimerase                                                   |                                                                                   |
| SGBXF1_03949                                                                                                 | <i>lysA</i>  | Diaminopimelate decarboxylase                                               |                                                                                   |
| SGBXF1_00888                                                                                                 | <i>proB</i>  | Glutamate 5-kinase                                                          |                                                                                   |
| SGBXF1_00889                                                                                                 | <i>proA</i>  | Glutamate-5-semialdehyde dehydrogenase                                      |                                                                                   |
| SGBXF1_04127                                                                                                 | <i>proC</i>  | Pyrroline-5-carboxylate reductas                                            |                                                                                   |
| SGBXF1_03925                                                                                                 | <i>argAB</i> | Amino-acid N-acetyltransferase                                              | Ornithine biosynthesis, glutamate => ornithine                                    |
| SGBXF1_04687                                                                                                 | <i>argB</i>  | Acetylglutamate kinase                                                      |                                                                                   |
| SGBXF1_04688                                                                                                 | <i>argC</i>  | N-acetyl-gamma-glutamyl-phosphate reductase                                 |                                                                                   |
| SGBXF1_04524                                                                                                 | <i>argD</i>  | Acetylornithine/N-succinyldiaminopimelate aminotransferase                  |                                                                                   |
| SGBXF1_04689                                                                                                 | <i>argE</i>  | Acetylornithine deacetylase                                                 |                                                                                   |
| SGBXF1_01589                                                                                                 | <i>hisG</i>  | ATP phosphoribosyltransferase                                               | Histidine biosynthesis, PRPP => histidine                                         |
| SGBXF1_01582                                                                                                 | <i>hisIE</i> | Phosphoribosyl-ATP pyrophosphohydrolase / phosphoribosyl-AMP cyclohydrolase |                                                                                   |
| SGBXF1_01584                                                                                                 | <i>hisA</i>  | Phosphoribosylformimino-5-aminoimidazole carboxamide ribotide isomerase     |                                                                                   |

|                                              |              |                                                                             |                                                                                 |
|----------------------------------------------|--------------|-----------------------------------------------------------------------------|---------------------------------------------------------------------------------|
| SGBXF1_01585                                 | <i>hisH</i>  | Glutamine amidotransferase                                                  |                                                                                 |
| SGBXF1_01583                                 | <i>hisF</i>  | Cyclase                                                                     |                                                                                 |
| SGBXF1_01587                                 | <i>hisC</i>  | Histidinol-phosphate aminotransferase                                       |                                                                                 |
| SGBXF1_01586                                 | <i>hisB</i>  | Imidazoleglycerol-phosphate dehydratase / histidinol-phosphatase            |                                                                                 |
| SGBXF1_01588                                 | <i>hisD</i>  | Histidinol dehydrogenase                                                    |                                                                                 |
| SGBXF1_00732<br>SGBXF1_00737<br>SGBXF1_02105 | <i>hutH</i>  | Histidine ammonia-lyase                                                     | Histidine degradation,<br>histidine => N-<br>formiminoglutamate =><br>glutamate |
| SGBXF1_00738<br>SGBXF1_02107                 | <i>hutU</i>  | Urocanate hydratase                                                         |                                                                                 |
| SGBXF1_02095                                 | <i>hutI</i>  | Imidazolonepropionase                                                       |                                                                                 |
| SGBXF1_02094                                 | <i>hutG</i>  | Formiminoglutamase                                                          |                                                                                 |
| SGBXF1_00798<br>SGBXF1_01226<br>SGBXF1_02194 | <i>aroG</i>  | 3-deoxy-7-phosphoheptulonate synthase                                       |                                                                                 |
| SGBXF1_04544                                 | <i>aroB</i>  | 3-dehydroquinate synthase                                                   | Shikimate pathway,<br>phosphoenolpyruvate +<br>erythrose-4P => chorismate       |
| SGBXF1_04362                                 | <i>aroQ</i>  | 3-dehydroquinate dehydratase II                                             |                                                                                 |
| SGBXF1_04177<br>SGBXF1_04450                 | <i>aroE</i>  | Shikimate dehydrogenase                                                     |                                                                                 |
| SGBXF1_00945<br>SGBXF1_04545                 | <i>aroK</i>  | Shikimate kinase                                                            |                                                                                 |
| SGBXF1_01672                                 | <i>aroA</i>  | 3-phosphoshikimate 1-carboxyvinyltransferase                                |                                                                                 |
| SGBXF1_03437                                 | <i>aroC</i>  | Chorismate synthase                                                         | Tryptophan biosynthesis,<br>chorismate => tryptophan                            |
| SGBXF1_02716                                 | <i>trpE</i>  | Anthranilate synthase component I                                           |                                                                                 |
| SGBXF1_02717                                 | <i>trpG</i>  | Anthranilate synthase component II                                          |                                                                                 |
| SGBXF1_02718                                 | <i>trpD</i>  | Anthranilate phosphoribosyltransferase                                      |                                                                                 |
| SGBXF1_02719                                 | <i>trpCF</i> | Indole-3-glycerol phosphate synthase / phosphoribosylanthranilate isomerase |                                                                                 |
| SGBXF1_02721                                 | <i>trpA</i>  | Tryptophan synthase alpha chain                                             |                                                                                 |
| SGBXF1_02720                                 | <i>trpB</i>  | Tryptophan synthase beta chain                                              |                                                                                 |
| SGBXF1_00799                                 | <i>tyrA</i>  | Chorismate mutase / prephenate dehydrogenase                                |                                                                                 |
| SGBXF1_02092                                 | <i>pheA1</i> | Chorismate mutase                                                           |                                                                                 |
| SGBXF1_04394                                 | <i>pheC</i>  | Cyclohexadienyl dehydratase                                                 |                                                                                 |
| SGBXF1_00800                                 | <i>pheA</i>  | Chorismate mutase / prephenate dehydratase                                  | Phenylalanine biosynthesis,<br>chorismate => phenylalanine                      |
| SGBXF1_03106<br>SGBXF1_04392                 | <i>tyrB</i>  | Aromatic-amino-acid transaminase                                            |                                                                                 |
| SGBXF1_00800                                 | <i>pheA</i>  | Chorismate mutase / prephenate dehydratase                                  |                                                                                 |
| SGBXF1_02092                                 | <i>pheA1</i> | Chorismate mutase                                                           | Tyrosine biosynthesis,<br>chorismate => tyrosine                                |
| SGBXF1_00799                                 | <i>tyrA</i>  | Chorismate mutase / prephenate dehydrogenase                                |                                                                                 |
| SGBXF1_03106<br>SGBXF1_04392                 | <i>tyrB</i>  | Aromatic-amino-acid transaminase                                            |                                                                                 |
| SGBXF1_3113                                  | <i>davD</i>  | Glutarate-semialdehyde dehydrogenase                                        |                                                                                 |

**Table S17-** Genes involved in amino acid transport

| Locus tag/operon                                                                             | Gene/operon        | Product/putative product                                             | Function/Putative function                 |
|----------------------------------------------------------------------------------------------|--------------------|----------------------------------------------------------------------|--------------------------------------------|
| SGBXF1_01318                                                                                 | <i>argT</i>        | Lysine/arginine/ornithine transport system substrate-binding protein | Lysine/arginine/ornithine transport system |
| SGBXF1_02420<br>SGBXF1_03389                                                                 | <i>hisM</i>        | Histidine transport system permease protein                          |                                            |
| SGBXF1_03390                                                                                 | <i>hisQ</i>        | Histidine transport system permease protein                          |                                            |
| SGBXF1_03388                                                                                 | <i>hisP</i>        | Histidine transport system ATP-binding protein                       |                                            |
| SGBXF1_02418<br>SGBXF1_03391                                                                 | <i>hisJ</i>        | Histidine transport system substrate-binding protein                 | Histidine transport system                 |
| SGBXF1_02420<br>SGBXF1_03389                                                                 | <i>hisM</i>        | Histidine transport system permease protein                          |                                            |
| SGBXF1_03390                                                                                 | <i>hisQ</i>        | Histidine transport system permease protein                          |                                            |
| SGBXF1_03388                                                                                 | <i>hisP</i>        | Histidine transport system ATP-binding protein                       |                                            |
| SGBXF1_01442-44                                                                              | <i>glnOPH</i>      | Glutamine transport system proteins                                  | Glutamine transport system                 |
| SGBXF1_01626-30                                                                              | <i>artJMQIP</i>    | Arginine transport system proteins                                   | Arginine transport system                  |
| SGBXF1_01138-41                                                                              | <i>gltLKJI</i>     | Glutamate/aspartate transport system protein                         | Glutamate/aspartate transport system       |
| SGBXF1_02965-67                                                                              | <i>yecCS, fliY</i> | Cystine transport system proteins                                    | Cystine transport system                   |
| SGBXF1_00244<br>SGBXF1_02581<br>SGBXF1_03227                                                 | <i>livK</i>        | Branched-chain amino acid transport system substrate-binding protein | Branched-chain amino acid transport system |
| SGBXF1_00245<br>SGBXF1_02577<br>SGBXF1_03226                                                 | <i>livH</i>        | Branched-chain amino acid transport system permease protein          |                                            |
| SGBXF1_00246<br>SGBXF1_02578<br>SGBXF1_03225                                                 | <i>livM</i>        | Branched-chain amino acid transport system permease protein          |                                            |
| SGBXF1_00247<br>SGBXF1_02579<br>SGBXF1_03224                                                 | <i>livG</i>        | Branched-chain amino acid transport system ATP-binding protein       |                                            |
| SGBXF1_00248<br>SGBXF1_02580<br>SGBXF1_03223                                                 | <i>livF</i>        | Branched-chain amino acid transport system ATP-binding protein       |                                            |
| SGBXF1_01308<br>SGBXF1_01345<br>SGBXF1_01991<br>SGBXF1_03864                                 | <i>metQ</i>        | D-methionine transport system substrate-binding protein              |                                            |
| SGBXF1_01346<br>SGBXF1_03863                                                                 | <i>metI</i>        | D-methionine transport system permease protein                       |                                            |
| SGBXF1_01347<br>SGBXF1_03862                                                                 | <i>metN</i>        | D-methionine transport system ATP-binding protein                    |                                            |
| SGBXF1_00033<br>SGBXF1_00753<br>SGBXF1_00854<br>SGBXF1_01936<br>SGBXF1_02433                 | <i>ABC.PA.S</i>    | Polar amino acid transport system substrate-binding protein          | Putative polar amino acid transport system |
| SGBXF1_00034<br>SGBXF1_00035<br>SGBXF1_00752<br>SGBXF1_00855<br>SGBXF1_00856<br>SGBXF1_01109 | <i>ABC.PA.P</i>    | Polar amino acid transport system permease protein                   |                                            |

|                                                              |                 |                                                             |                                   |
|--------------------------------------------------------------|-----------------|-------------------------------------------------------------|-----------------------------------|
| SGBXF1_00751<br>SGBXF1_00857<br>SGBXF1_01108                 | <i>ABC.PA.A</i> | Polar amino acid transport system ATP-binding protein       |                                   |
| SGBXF1_02556<br>SGBXF1_02658<br>SGBXF1_02742<br>SGBXF1_02743 | <i>oppA</i>     | Oligopeptide transport system substrate-binding protein     | Oligopeptide transport system     |
| SGBXF1_02741                                                 | <i>oppB</i>     | Oligopeptide transport system permease protein              |                                   |
| SGBXF1_02740                                                 | <i>oppC</i>     | Oligopeptide transport system permease protein              |                                   |
| SGBXF1_02739                                                 | <i>oppD</i>     | Oligopeptide transport system ATP-binding protein           |                                   |
| SGBXF1_02738                                                 | <i>oppF</i>     | Oligopeptide transport system ATP-binding protein           |                                   |
| SGBXF1_00149<br>SGBXF1_03507                                 | <i>dppA</i>     | Dipeptide transport system substrate-binding protein        |                                   |
| SGBXF1_00150                                                 | <i>dppB</i>     | Dipeptide transport system permease protein                 |                                   |
| SGBXF1_00151                                                 | <i>dppC</i>     | Dipeptide transport system permease protein                 |                                   |
| SGBXF1_00152                                                 | <i>dppD</i>     | Dipeptide transport system ATP-binding protein              |                                   |
| SGBXF1_00153                                                 | <i>dppF</i>     | Dipeptide transport system ATP-binding protein              |                                   |
| SGBXF1_02675                                                 | <i>sapA</i>     | Cationic peptide transport system substrate-binding protein | Cationic peptide transport system |
| SGBXF1_02676                                                 | <i>sapB</i>     | Cationic peptide transport system permease protein          |                                   |
| SGBXF1_02677                                                 | <i>sapC</i>     | Cationic peptide transport system permease protein          |                                   |
| SGBXF1_02678                                                 | <i>sapD</i>     | Cationic peptide transport system ATP-binding protein       |                                   |
| SGBXF1_02679                                                 | <i>sapF</i>     | Cationic peptide transport system ATP-binding protein       |                                   |

**Table S18-** Genes involved in flavonoids, phenylpropanoids and other phenolics metabolism

| <b>Locus tag/operon</b>                      | <b>Gene/operon</b> | <b>Product/putative product</b>    | <b>Function/Putative function</b>                                                                                         |
|----------------------------------------------|--------------------|------------------------------------|---------------------------------------------------------------------------------------------------------------------------|
| SGBXF1_00927<br>SGBXF1_02885<br>SGBXF1_04589 | <i>yhhW</i>        | Quercetin dioxygenase              | Is involved quercetin degradation, which is part of Flavonoid metabolism                                                  |
| SGBXF1_02439<br>SGBXF1_03028                 | <i>nodD</i>        | Nodulation protein D               | Regulator that binds flavonoids as inducers                                                                               |
| SGBXF1_00893                                 | <i>fdc</i>         | Ferulate decarboxylase             | Catalyzes the reversible decarboxylation of aromatic carboxylic acids like ferulic acid, p-coumaric acid or cinnamic acid |
| SGBXF1_00562-572                             | <i>hpaBC</i>       | HPA monooxygenase                  | Hydroxylation of tyrosol and various cinnamic acid derivatives;<br>Phenol oxidation to catechol                           |
| SGBXF1_03026                                 | <i>curA</i>        | NADPH-dependent curcumin reductase | Reduction of curcumin and other phenolics                                                                                 |

**Table S19-** Genes encoding for lipolytic enzymes

| Locus tag/operon | Gene/operon  | Product/putative product                | Function/Putative function                                                                              |
|------------------|--------------|-----------------------------------------|---------------------------------------------------------------------------------------------------------|
| SGBXF1_00070     | <i>lip1</i>  | Lipase*                                 | Triglyceride lipase activity                                                                            |
| SGBXF1_00549     | <i>ytpA</i>  | Monoacylglycerol lipase                 | Hydrolyzes glycerol monoesters of long-chain fatty acids                                                |
| SGBXF1_02235     | <i>lipA</i>  | Triacylglycerol lipase                  | Triglyceride lipase activity                                                                            |
| SGBXF1_03745-46  | <i>phlAB</i> | Phospholipase A                         | Lipid degradation                                                                                       |
| SGBXF1_04161     | <i>plcN</i>  | Non-hemolytic phospholipase C           | Hydrolyzes phosphatidylserine as well as phosphatidylcholine                                            |
| SGBXF1_02568     | <i>are</i>   | Arylesterase                            | Degradation of various p-nitrophenyl phosphates, aromatic esters and p-nitrophenyl fatty acids in vitro |
| SGBXF1_00386     | <i>yjfP</i>  | Esterase                                | Activity toward palmitoyl-CoA and pNP-butyrate                                                          |
| SGBXF1_01173     | <i>ybfF</i>  | Esterase                                | Activity toward palmitoyl-CoA, malonyl-CoA and pNP-butyrate                                             |
| SGBXF1_02199     | <i>menI</i>  | 1,4-dihydroxy-2-naphthoyl-CoA hydrolase | Hydrolysis of 1,4-dihydroxy-2-naphthoyl-CoA and other acyl-CoA thioesters                               |
| SGBXF1_02306     | <i>estB</i>  | Esterase                                | Acts on short-chain (C4-C6) fatty acid esters and triglycerides, including tertiary alcohol esters      |
| SGBXF1_04210     | <i>yqiA</i>  | Esterase                                | Activity toward palmitoyl-CoA, malonyl-CoA and pNP-butyrate.                                            |
| SGBXF1_00207     | <i>pldA</i>  | Phosphatidylcholine 1-acylhydrolase     | Lipid degradation                                                                                       |
| SGBXF1_00211     | <i>pldB</i>  | Lysophospholipase L2, Lecithinase B     | Lipid degradation                                                                                       |

\*42% identity to *Xenorhabdus luminescens* lipase (Wang and Dowds, 1993).

#### Reference

**Wang H, Dowds BCA.** Phase variation in *Xenorhabdus luminescens*: Cloning and sequencing of the lipase gene and analysis of its expression in primary and secondary phases of the bacterium. *J Bacteriol* 1993; 175:1665–73.

**Table S20-** Genes encoding for extracellular proteases

| Locus tag/operon | Gene/operon | Product/putative product      | Function/Putative function                                    |
|------------------|-------------|-------------------------------|---------------------------------------------------------------|
| SGBXF1_00223     | <i>przN</i> | Serralysin*                   | Several proteolytic activities                                |
| SGBXF1_02114     | <i>prtA</i> | Serralysin§                   | Inhibition of antibacterial peptides                          |
| SGBXF1_02115     | <i>prtA</i> | Serralysin#                   | Inhibition of antibacterial peptides                          |
| SGBXF1_02407     | <i>przN</i> | Serralysin**                  | Several proteolytic activities                                |
| SGBXF1_03669     | <i>prtS</i> | Grimelysin                    | Actin degradation and possibly several proteolytic activities |
| SGBXF1_04648     | <i>prtS</i> | Extracellular serine protease | Several proteolytic activities                                |
| SGBXF1_04649     | <i>prtS</i> | Extracellular serine protease | Several proteolytic activities                                |

\*aprox. 92% identity

\*\*aprox. 60% identity

to *S. marcescens* HR-3 serralysin with insecticidal activity (high doses) (Tao et al., 2006)

\*aprox. 92% identity

\*\*aprox. 59% identity

to *S. marcescens* ATCC 21074 serralysin, UniProtKB - P07268 (PRZN\_SERME), which allows an emerging moth to dissolve its cocoon.

\*aprox. 62% identity

\*\*aprox. 54% identity

to *Erwinia chrysanthemi* EC16 serralysin homolog which presents gelatinase activity, but is not involved in the virulence of this strain. Interestingly, high levels of serralysin decreased pectate lyase activity (Dhaler et al., 1990).

§aprox. 55% identity

#aprox. 68% identity

to *Photorhabdus* sp. Az29 proteases involved in the inhibition of insect antibacterial peptides. Reduces the antibacterial activity of *G. mellonella* hemolymph by 50%. Reduces the antibacterial activity of cecropin A by 80% and cecropin B by 75% (Cabral et al., 2004).

## References

**Tao K, Long Z, Liu K, Tao Y, Liu S.** Purification and properties of a novel insecticidal protein from the locust pathogen *Serratia marcescens* HR-3. *Curr Microbiol* 2006; 52, 45–49.

**Dahler GS, Barras F, Keen NT.** Cloning of genes encoding extracellular metalloproteases from *Erwinia chrysanthemi* Ec16. *Phytopathology* 1990; 80:983–4.

**Cabral CM, Cherqui A, Pereira A, Simões N.** Purification and characterization of two distinct metalloproteases secreted by the entomopathogenic bacterium *Photorhabdus* sp. strain Az29.

**Table S21-** Genes involved in ROS stress response and protection

| <b>Locus tag/operon</b>                                      | <b>Gene/operon</b> | <b>Product/putative product</b>                        | <b>Function/Putative function</b>                                                        |
|--------------------------------------------------------------|--------------------|--------------------------------------------------------|------------------------------------------------------------------------------------------|
| SGBXF1_00084                                                 | <i>sodA</i>        | Superoxide dismutase [Mn]                              | Destroys superoxide anion radicals                                                       |
| SGBXF1_02210                                                 | <i>sodB</i>        | Superoxide dismutase [Fe]                              |                                                                                          |
| SGBXF1_02236                                                 | <i>sodC</i>        | Superoxide dismutase [Cu-Zn]                           |                                                                                          |
| SGBXF1_03342                                                 | <i>katA</i>        | Catalase                                               | Protect cells from the toxic effects of hydrogen peroxide                                |
| SGBXF1_03212                                                 | <i>katG</i>        | Catalase-peroxidase                                    |                                                                                          |
| SGBXF1_03828                                                 | <i>ahpD</i>        | Alkyl peroxidase                                       | Peroxidase active against hydrogen and alkyl peroxides serves as peroxynitrite reductase |
| SGBXF1_02663                                                 | <i>tpx</i>         | Thylol peroxidase                                      | Removes peroxides or H <sub>2</sub> O <sub>2</sub>                                       |
| SGBXF1_00141-42                                              | <i>ohrBR</i>       | Organic hydroperoxide resistance protein OhrB          | Involved in organic hydroperoxide resistance                                             |
| SGBXF1_04682                                                 | <i>hyPrx5</i>      | Hybrid peroxiredoxin                                   | Peroxidase and peroxiredoxin activity                                                    |
| SGBXF1_02246<br>SGBXF1_03110                                 | <i>gstA</i>        | Glutathione S-transferase                              | Defense against oxidative stress                                                         |
| SGBXF1_01597<br>SGBXF1_01654                                 | <i>gstB</i>        | Glutathione S-transferase                              |                                                                                          |
| SGBXF1_04252                                                 | <i>yfcF</i>        | Glutathione S-transferase                              |                                                                                          |
| SGBXF1_01515-18                                              | <i>gsiABCD</i>     | Glutathione import system proteins                     |                                                                                          |
| SGBXF1_02193                                                 | <i>gpx</i>         | Glutathione peroxidase                                 | Detoxification of Reactive Oxygen Species                                                |
| SGBXF1_04122                                                 | <i>gshB</i>        | Glutathione synthetase                                 | Glutathione biosynthesis                                                                 |
| SGBXF1_04644                                                 | <i>gor</i>         | Glutathione reductase                                  | Glutathione metabolism                                                                   |
| SGBXF1_01616<br>SGBXF1_02224<br>SGBXF1_02847<br>SGBXF1_04725 | <i>grxA</i>        | Glutaredoxin                                           | Cell redox homeostasis                                                                   |
| SGBXF1_03829                                                 | <i>nrdH</i>        | Glutaredoxin-like protein                              |                                                                                          |
| SGBXF1_00812-28                                              | <i>arpe</i>        | Arylpolyene                                            | Involved in oxidative stress resistance                                                  |
| SGBXF1_03704                                                 | <i>hmp</i>         | Nitric oxide dioxygenase                               | Nitrosative stress response                                                              |
| SGBXF1_02201-06                                              | <i>sufABCDSE</i>   | FeS cluster assembly proteins and cysteine desulfurase | Involved in oxidative stress resistance                                                  |



**Table S22-** Phytohormone, polyamines and monoamine modulation genes

| Locus tag/operon                             | Gene/operon           | Product/putative product                                             | Function/Putative function                             |
|----------------------------------------------|-----------------------|----------------------------------------------------------------------|--------------------------------------------------------|
| SGBXF1_03481                                 | <i>ipdC</i>           | Indole pyruvate decarboxylase                                        | IAA biosynthesis                                       |
| SGBXF1_04163                                 | <i>iaaasp</i>         | IAA-aspartate hydrolase                                              | Degradation of IAA-aspartate                           |
| SGBXF1_03089-03103                           | <i>paaABCDEFGHIJK</i> | 1,2-phenylacetyl-CoA epoxidase and other elements                    | PAA degradation                                        |
| SGBXF1_02759                                 | <i>yvdD</i>           | LOG family protein                                                   | Cytokinin production                                   |
| SGBXF1_03911                                 | <i>ygdH</i>           | LOG family protein                                                   | Cytokinin production                                   |
| SGBXF1_02336                                 | <i>xdhA</i>           | Xanthine dehydrogenase                                               | Cytokinin modification                                 |
| SGBXF1_02337                                 | <i>xdhB</i>           | Xanthine dehydrogenase                                               | Cytokinin modification                                 |
| SGBXF1_03348                                 | <i>menF</i>           | Isochorismate synthase                                               | Salicylate biosynthesis                                |
| SGBXF1_03497                                 | <i>entC</i>           | Isochorismate synthase                                               |                                                        |
| SGBXF1_03572                                 | <i>pchB</i>           | Isochorismate pyruvate lyase                                         |                                                        |
| SGBXF1_04255                                 | <i>puuE</i>           | 4-aminobutyrate aminotransferase                                     | GABA degradation                                       |
| SGBXF1_04254                                 | <i>gabD</i>           | Succinate-semialdehyde dehydrogenase                                 |                                                        |
| SGBXF1_04074                                 | <i>speA</i>           | Arginine decarboxylase                                               | Putrescine production via L-arginine                   |
| SGBXF1_04070                                 | <i>speB</i>           | Agmatinase                                                           |                                                        |
| SGBXF1_00454                                 | <i>speC</i>           | Ornithine decarboxylase                                              | Putrescine production via L-ornithine                  |
| SGBXF1_04140                                 | <i>speF</i>           | Ornithine decarboxylase                                              |                                                        |
| SGBXF1_04100-101                             | <i>speDE</i>          | S-adenosylmethionine decarboxylase, Polyamine aminopropyltransferase | Spermidine biosynthesis                                |
| SGBXF1_03876-77                              | <i>cadAB</i>          | Lysine decarboxylase<br>Cadaverine/lysine antiporter                 | Cadaverine biosynthesis                                |
| SGBXF1_02442                                 | <i>ddc</i>            | L-2,4-diaminobutyrate decarboxylase                                  | 1,3-diaminopropane biosynthesis                        |
| SGBXF1_02443                                 | <i>dat</i>            | Diaminobutyrate--2-oxoglutarate aminotransferase                     |                                                        |
| SGBXF1_03604<br>SGBXF1_03660                 | <i>speG</i>           | Spermidine N(1)-acetyltransferase                                    | Protection against polyamine toxicity                  |
| SGBXF1_02813<br>SGBXF1_02814<br>SGBXF1_04618 | <i>mdtJ</i>           | Spermidine export protein                                            | Protection against polyamine toxicity                  |
| SGBXF1_2080-84                               | <i>puuABCD</i>        | Gamma-glutamyl-gamma-aminobutyrate hydrolase and others              | Putrescine degradation, GABA formation                 |
| SGBXF1_03712                                 | <i>patD</i>           | Gamma-aminobutyraldehyde dehydrogenase                               | Putrescine degradation, GABA formation                 |
| SGBXF1_00557                                 | <i>moaEF</i>          | Monoamine oxidoreductase                                             | Conversion of monoamine compounds or their metabolites |

**Table S23-** Genes involved in mixed acid fermentation and VOC production

| Locus tag/operon             | Gene/operon                | Product/putative product                                    | Function/Putative function                                                   |
|------------------------------|----------------------------|-------------------------------------------------------------|------------------------------------------------------------------------------|
| SGBXF1_03381                 | <i>ackA</i>                | Acetate kinase                                              | Acetate formation                                                            |
| SGBXF1_02050                 | <i>icd</i>                 | Isocitrate dehydrogenase [NADP]                             | 2-oxoglutarate formation                                                     |
| SGBXF1_04118                 | <i>fumA</i>                | Fumarate hydratase class I, aerobic                         | Succinate formation                                                          |
| SGBXF1_02310                 | <i>fumC</i>                | Fumarate hydratase class II                                 | Succinate formation                                                          |
| SGBXF1_0274                  | <i>adhE</i>                | Aldehyde-alcohol dehydrogenase                              | Ethanol formation                                                            |
| SGBXF1_01314                 | <i>dld</i>                 | D-lactate dehydrogenase                                     | (R)-lactate formation                                                        |
| SGBXF1_02633                 | <i>ldhA</i>                | D-lactate dehydrogenase                                     |                                                                              |
| SGBXF1_03968                 | <i>lldD</i>                | L-lactate dehydrogenase                                     | (S)-lactate formation                                                        |
| SGBXF1_03509                 | <i>budA</i>                | Acetolactate synthase                                       | Acetoin production                                                           |
| SGBXF1_03508                 | <i>budB</i>                | $\alpha$ -acetolactate decarboxylase                        |                                                                              |
| SGBXF1_04219                 | <i>dhaD</i>                | Glycerol dehydrogenase                                      | Glycerol fermentation<br>Can also oxidize 1,2-propanediol and 2,3-butanediol |
| SGBXF1_03274<br>SGBXF1_03945 | <i>dmsA</i>                | Dimethyl sulfoxide/trimethylamine N-oxide reductase         | DMS production                                                               |
| SGBXF1_04360-61              | <i>mrsPQ</i>               | Methionine-sulfoxide reductase                              |                                                                              |
| SGBXF1_04667                 | <i>ilvE</i>                | Branched-chain-amino-acid aminotransferase                  | Amino acid degradation                                                       |
| SGBXF1_00918                 | <i>ipdC</i>                | Indole-pyruvate decarboxylase                               | Transforms pyruvate to acetaldehyde                                          |
| SGBXF1_03481                 | <i>ipdC2</i>               | Indole-pyruvate decarboxylase                               |                                                                              |
| SGBXF1_02428                 | <i>adhP</i>                | Alcohol dehydrogenase 1                                     | Involved in the production of alcohols, aldehyde or ketone                   |
| SGBXF1_03723                 | <i>adhB</i>                | Alcohol dehydrogenase 2                                     |                                                                              |
| SGBXF1_04185                 | <i>adh2</i><br><i>ykhD</i> | Long-chain-alcohol dehydrogenase 2<br>Alcohol dehydrogenase | Involved in the production of long chain alcohols, aldehyde or ketone        |
| SGBXF1_02745                 | <i>adhE</i>                | Aldehyde-alcohol dehydrogenase                              | Involved in the production of alcohols, aldehyde or ketone                   |
| SGBXF1_01978                 | <i>xylB</i>                | Benzyl alcohol dehydrogenase                                | Involved in the production of benzyl alcohols, benzyl aldehyde benzyl ketone |

**Table S24-** Genes involved in fatty acid metabolism

| Locus tag/operon                                                                                                             | Gene/operon  | Product/putative product                                                                             | Function/Putative function |
|------------------------------------------------------------------------------------------------------------------------------|--------------|------------------------------------------------------------------------------------------------------|----------------------------|
| SGBXF1_04363-64                                                                                                              | <i>accBC</i> | Acetyl-coa carboxylase and carrier                                                                   | Fatty acid biosynthesis    |
| SGBXF1_03884                                                                                                                 | <i>accA</i>  | Acetyl-coa carboxylase carboxyl transferase subunit alpha                                            |                            |
| SGBXF1_03397                                                                                                                 | <i>accD</i>  | Acetyl-coa carboxylase carboxyl transferase subunit beta                                             |                            |
| SGBXF1_01919                                                                                                                 | <i>fabD</i>  | Malonyl coa-acyl carrier protein transacylase                                                        |                            |
| SGBXF1_01918<br>SGBXF1_02920                                                                                                 | <i>fabH</i>  | 3-oxoacyl-[acyl-carrier-protein] synthase III                                                        |                            |
| SGBXF1_00824<br>SGBXF1_03431                                                                                                 | <i>fabB</i>  | 3-oxoacyl-[acyl-carrier-protein] synthase I                                                          |                            |
| SGBXF1_00827<br>SGBXF1_01714<br>SGBXF1_01922                                                                                 | <i>fabF</i>  | 3-oxoacyl-[acyl-carrier-protein] synthase II                                                         |                            |
| SGBXF1_00130<br>SGBXF1_00136<br>SGBXF1_00559<br>SGBXF1_00826<br>SGBXF1_01355<br>SGBXF1_01920<br>SGBXF1_03834<br>SGBXF1_04382 | <i>fabG</i>  | 3-oxoacyl-[acyl-carrier protein] reductase                                                           |                            |
| SGBXF1_02405<br>SGBXF1_03889                                                                                                 | <i>fabZ</i>  | 3-hydroxyacyl-[acyl-carrier-protein] dehydratase [EC:4.2.1.59]                                       |                            |
| SGBXF1_01716                                                                                                                 | <i>fabA</i>  | 3-hydroxyacyl-[acyl-carrier protein] dehydratase / trans-2-decenoyl-[acyl-carrier protein] isomerase |                            |
| SGBXF1_01972                                                                                                                 | <i>fabV</i>  | Enoyl-[acyl-carrier protein] reductase / trans-2-enoyl-coa reductase (NAD <sup>+</sup> )             |                            |
| SGBXF1_00680<br>SGBXF1_02496<br>SGBXF1_02808                                                                                 | <i>lcfH</i>  | Long-chain acyl-coa synthetase<br>Long-chain-fatty-acid--coa ligase                                  |                            |
| SGBXF1_00870                                                                                                                 | <i>fadE</i>  | Acyl-coa dehydrogenase                                                                               |                            |
| SGBXF1_00279                                                                                                                 | <i>fadB</i>  | Fatty acid oxidation complex subunit alpha                                                           |                            |
| SGBXF1_03441                                                                                                                 | <i>fadJ</i>  | Fatty acid oxidation complex subunit alpha                                                           |                            |
| SGBXF1_00278<br>SGBXF1_03442                                                                                                 | <i>fadA</i>  | Acetyl-coa acyltransferase                                                                           |                            |
| SGBXF1_03444                                                                                                                 | <i>fadL</i>  | Long-chain fatty acid transport protein                                                              |                            |
